# Supplementary material for: Construction of the tetracyclic ring system of diterpene alkaloids via cationic [5 + 2] cycloaddition
Source: Royal Society of Chemistry journal article supplement (doi:10.1039/d3ob00647f), 2023-01-01

## Supporting Information

### Construction of the Tetracyclic Ring System of Diterpene Alkaloids via Cationic [5+2] Cycloaddition

Kosuke Mizuno, Yoshitake Nishiyama, and Satoshi Yokoshima\*

Graduate School of Pharmaceutical Sciences, Nagoya University, Nagoya 464-8601, Japan

\*E-mail: yokosima@ps.nagoya-u.ac.jp

## Table of Contents

|                                           |     |
|-------------------------------------------|-----|
| General Remarks.....                      | S2  |
| Experimental Procedure for Compounds..... | S3  |
| Procedure for Calculations.....           | S29 |
| Spectra for Compounds .....               | S32 |

## General Remarks

Nuclear magnetic resonance (NMR) spectra were determined on a JEOL-ECS400 or JEOL-ECZ400 instrument. Chemical shifts for  $^1\text{H}$  NMR are reported in parts per million (ppm) downfields from tetramethylsilane as the internal standard, and coupling constants are in hertz (Hz). The following abbreviations are used for spin multiplicity: s = singlet, d = doublet, m = multiplet. Chemical shifts for  $^{13}\text{C}$  NMR are reported in ppm relative to the center line of a triplet at 77.0 ppm for deuteriochloroform. Infrared (IR) spectra were recorded on a JASCO FT/IR-4100 Fourier Transform Infrared Spectrophotometer and are reported in wavenumbers ( $\text{cm}^{-1}$ ). High resolution mass spectra (HRMS) were obtained on a Bruker Daltonics compact in positive electrospray ionization (ESI) method, using ESI tuning mix as the internal standard. Analytical thin layer chromatography (TLC) was performed on Merck precoated analytical plates, 0.25 mm thick, silica gel 60 F254. Preparative TLC separations were performed on Merck analytical plates (0.25 or 0.50 mm thick) precoated with silica gel 60 F254. Flash chromatography separations were performed on KANTO CHEMICAL Silica Gel 60 (spherical, 40-100 mesh) or on KANTO CHEMICAL Silica Gel 60 (spherical, NH<sub>2</sub>, 40-50 mesh). Reagents were commercial grades and were used without any purification. Dehydrated tetrahydrofuran and dichloromethane were purchased from FUJIFILM Wako Pure Chemical Corporation. Dehydrated ethanol and acetonitrile were purchased from FUJIFILM Wako Pure Chemical Industries and stored over activated MS3A. All reactions sensitive to oxygen or moisture were conducted under an argon atmosphere. **S1**<sup>1</sup>, **S6**<sup>2</sup>, **S8**<sup>3</sup>, **2**<sup>4</sup>, and **1b**<sup>5</sup> were prepared according to the literature.



## Synthesis of styrene 1c

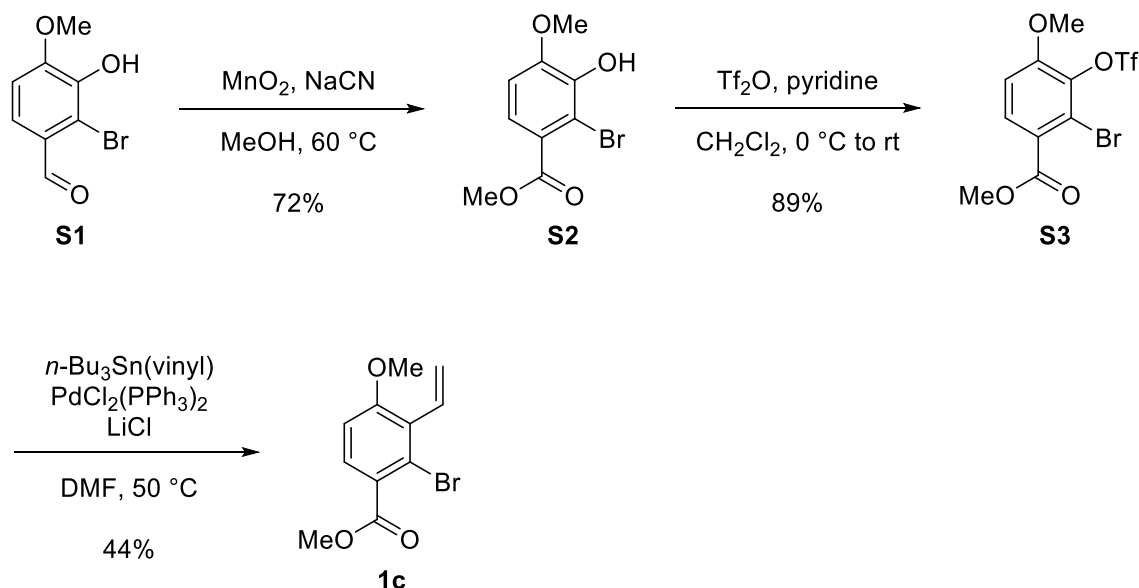

To a stirred solution of **S1** (78.8 mg, 0.341 mmol) in  $\text{MeOH}$  (1.7 mL) were added  $\text{NaCN}$  (50.1 mg, 1.02 mmol) and  $\text{MnO}_2$  (208 mg, 2.39 mmol) at rt. After stirring for 24 h at  $60\text{ }^\circ\text{C}$ , the resulting mixture was filtered through a pad of celite, and the filter cake was washed with  $\text{CH}_2\text{Cl}_2$  and 1N  $\text{HCl}$ . The resulting mixture was extracted three times with  $\text{CH}_2\text{Cl}_2$ . The combined organic layer was dried over  $\text{Na}_2\text{SO}_4$ , filtrated, and concentrated. The residue was purified by flash column chromatography on silica gel (20-40% ethyl acetate/hexane) to give **S2** (63.8 mg, 0.245 mmol, 72.0 %) as a yellow solid.

$^1\text{H NMR}$  ( $\text{CDCl}_3$ ): 7.50 (d,  $J = 8.7\text{ Hz}$ , 1H), 6.84 (d,  $J = 8.7\text{ Hz}$ , 1H), 3.96 (s, 3H), 3.91 (s, 3H)

$^{13}\text{C NMR}$  ( $\text{CDCl}_3$ ): 166.1 (C), 149.7 (C), 143.6 (C), 124.1 (C), 123.7 (CH), 108.9 (C), 108.7 (CH), 56.4 ( $\text{CH}_3$ ), 52.2 ( $\text{CH}_3$ )

**IR** (film,  $\text{cm}^{-1}$ ): 2924, 1720, 1596, 1489, 1436, 1285, 1220, 1139, 1030, 622

**HRMS** (ESI-QTOF) calcd for  $\text{C}_9\text{H}_9\text{BrNaO}_4^+ [\text{M}+\text{Na}^+]$  282.9576, found 282.9577

mp:  $156\text{--}160\text{ }^\circ\text{C}$

To a stirred solution of **S2** (104 mg, 0.398 mmol) in  $\text{CH}_2\text{Cl}_2$  (4.0 mL) were added pyridine (96  $\mu\text{L}$ , 1.2 mmol) and  $\text{Tf}_2\text{O}$  (114  $\mu\text{L}$ , 0.797 mmol) at  $0\text{ }^\circ\text{C}$ . After stirring for 1 h at rt, the resulting mixture was quenched with 1N  $\text{HCl}$  at the same temperature and extracted three times with  $\text{CH}_2\text{Cl}_2$ . The combined organic layer was dried over  $\text{Na}_2\text{SO}_4$ , filtrated, and concentrated. The residue was purified by flash column chromatography on silica gel (20-40% ethyl acetate/hexane) to give **S3** (138 mg, 0.353 mmol, 88.6%) as a yellow oil.

$^1\text{H NMR}$  ( $\text{CDCl}_3$ ): 7.90 (d,  $J = 8.9\text{ Hz}$ , 1H), 7.02 (d,  $J = 8.9\text{ Hz}$ , 1H), 3.98 (s, 3H), 3.93 (s, 3H)

$^{13}\text{C NMR}$  ( $\text{CDCl}_3$ ): 165.0 (C), 154.7 (C), 137.7 (C), 131.8 (CH), 125.1 (C), 118.5 ( $\text{CF}_3$ , q,  $J = 319.4\text{ Hz}$ ), 118.2 (C), 110.9 (CH), 56.6 ( $\text{CH}_3$ ), 52.6 ( $\text{CH}_3$ )

**IR** (film,  $\text{cm}^{-1}$ ): 2952, 1731, 1598, 1489, 1030, 999, 913, 849, 748, 592

**HRMS** (ESI-QTOF) calcd for  $\text{C}_{10}\text{H}_8\text{BrF}_3\text{NaO}_6\text{S}^+ [\text{M}+\text{Na}^+]$  414.9069, found 414.9055

To a stirred solution of **S3** (87.8 mg, 0.223 mmol) in DMF (1.5 mL) were added tributylvinyltin (72.1  $\mu$ L, 0.246 mmol), LiCl (28.4 mg, 0.670 mmol), and PdCl<sub>2</sub>(PPh<sub>3</sub>)<sub>2</sub> (7.8 mg, 0.011 mmol) at rt. After stirring for 12 h at 50 °C, the resulting mixture was quenched with H<sub>2</sub>O at rt and extracted three times with a 1:1 mixture of ethyl acetate and hexane. The combined organic layer was dried over Na<sub>2</sub>SO<sub>4</sub>, filtrated, and concentrated. The residue was purified by flash column chromatography on silica gel and K<sub>2</sub>CO<sub>3</sub> (5% w/w) (10-20% ethyl acetate/hexane) to give **1c** (26.5 mg, 43.8 %) as a clear oil.

**<sup>1</sup>H NMR** (CDCl<sub>3</sub>): 7.63 (d, *J* = 8.7 Hz, 1H), 6.88 (d, *J* = 8.7 Hz, 1H), 6.77 (dd, *J* = 17.9, 11.7 Hz, 1H), 5.81 (dd, *J* = 17.9, 1.8 Hz, 1H), 5.64 (dd, *J* = 11.7, 1.8 Hz, 1H), 3.91 (s, 3H), 3.88 (s, 3H)

**<sup>13</sup>C NMR** (CDCl<sub>3</sub>): 167.2 (C), 160.1 (C), 131.8 (CH), 130.5 (CH), 128.5 (C), 125.8 (C), 123.8 (C), 122.0 (CH<sub>2</sub>), 109.2 (CH), 56.0 (CH<sub>3</sub>), 52.3 (CH<sub>3</sub>)

**IR** (film, cm<sup>-1</sup>): 2922, 1728, 1579, 1433, 1362, 1263, 1189, 1139, 1029, 818

**HRMS** (ESI-QTOF) calcd for C<sub>11</sub>H<sub>11</sub>BrNaO<sub>3</sub><sup>+</sup> [M+Na<sup>+</sup>] 292.9784, found 292.9786

## Synthesis of styrene 1d

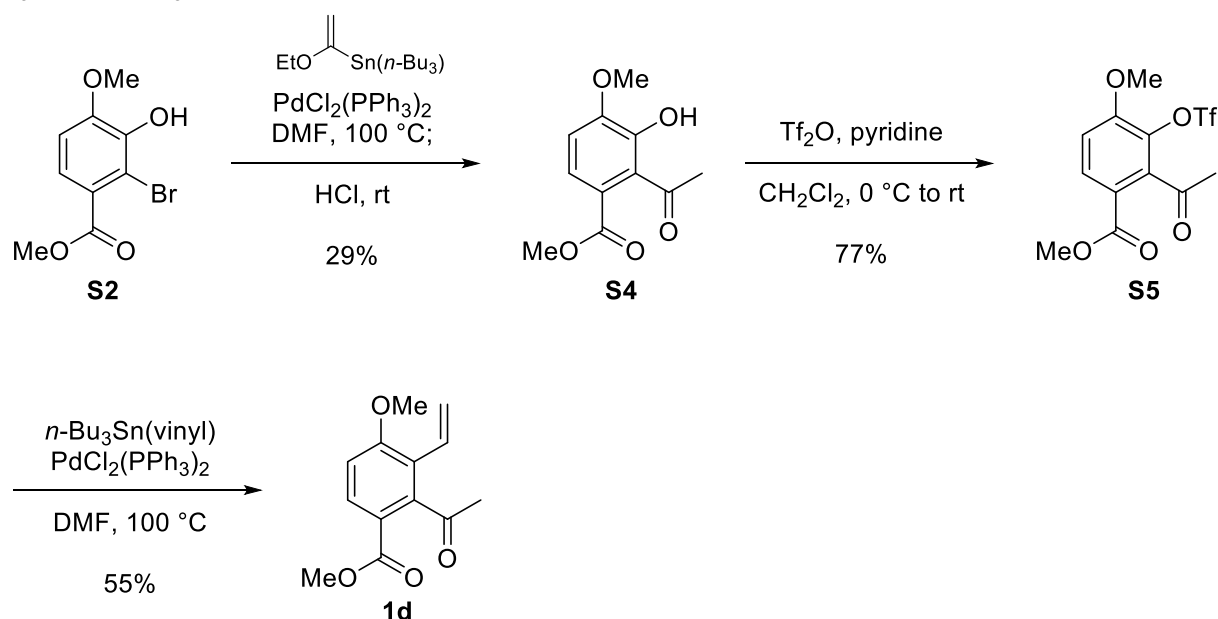

To a stirred solution of **S2** (127 mg, 0.486 mmol) in DMF (2.0 mL) were added (1-ethoxyvinyl)tri-*n*-butylstannane (181  $\mu\text{L}$ , 0.535 mmol) and  $\text{PdCl}_2(\text{PPh}_3)_2$  (34.0 mg, 0.0486 mmol) at rt. After stirring for 12 h at  $100\text{ }^\circ\text{C}$ , 2 M HCl (2 mL) was added to the reaction solution at rt. After stirring for 1 h at rt, the resulting mixture was quenched with aqueous  $\text{NaHCO}_3$  at the same temperature and extracted three times with a 1:1 mixture of ethyl acetate and hexane. The combined organic layer was dried over  $\text{Na}_2\text{SO}_4$ , filtrated, and concentrated. The residue was purified by flash column chromatography on silica gel and  $\text{K}_2\text{CO}_3$  (5% w/w) (20-35% ethyl acetate/hexane) to give **S4** (31.3 mg, 0.140 mmol, 28.7%) as an orange solid.

**$^1\text{H}$  NMR** ( $\text{CDCl}_3$ ): 7.52 (d,  $J = 8.2$  Hz, 1H), 6.88 (d,  $J = 8.2$  Hz, 1H), 6.67 (s, 1H), 3.96 (s, 3H), 3.85 (s, 3H), 2.56 (s, 3H)

**$^{13}\text{C}$  NMR** ( $\text{CDCl}_3$ ): 203.2 (C), 166.4 (C), 150.4 (C), 142.9 (C), 129.3 (C), 123.0 (CH), 120.8 (C), 110.2 (CH), 56.3 ( $\text{CH}_3$ ), 52.3 ( $\text{CH}_3$ ), 31.3 ( $\text{CH}_3$ )

**IR** (film,  $\text{cm}^{-1}$ ): 3397, 2361, 1710, 1606, 1437, 1349, 1282, 1133, 1042, 846

**HRMS** (ESI-QTOF) calcd for  $\text{C}_{11}\text{H}_{12}\text{NaO}_5^+$  [ $\text{M}+\text{Na}^+$ ] 247.0577, found 247.0583

mp:  $93\text{--}98\text{ }^\circ\text{C}$

To a stirred solution of **S4** (22.8 mg, 0.102 mmol) in  $\text{CH}_2\text{Cl}_2$  (1.0 mL) were added pyridine (16.4  $\mu\text{L}$ , 0.203 mmol) and  $\text{Tf}_2\text{O}$  (21.8  $\mu\text{L}$ , 0.153 mmol) at  $0\text{ }^\circ\text{C}$ . After stirring for 15 h at rt, the resulting mixture was quenched with 1N HCl at the same temperature and extracted three times with  $\text{CH}_2\text{Cl}_2$ . The combined organic layer was dried over  $\text{Na}_2\text{SO}_4$ , filtrated, and concentrated. The residue was purified by flash column chromatography on silica gel (20-40% ethylacetate/hexane) to give **S5** (28.0 mg, 0.0786 mmol, 77.1%) as a yellow oil.

**$^1\text{H}$  NMR** ( $\text{CDCl}_3$ ): 8.02 (d,  $J = 8.7$  Hz, 1H), 7.07 (d,  $J = 8.7$  Hz, 1H), 4.00 (s, 3H), 3.88 (s, 3H), 2.58 (s, 3H)

**$^{13}\text{C}$  NMR** ( $\text{CDCl}_3$ ): 198.7 (C), 164.7 (C), 154.6 (C), 139.3 (C), 133.9 (C), 131.7 (CH), 120.0 (C), 118.6 ( $\text{CF}_3$ , q,  $J = 319.4$  Hz), 112.2 (CH), 56.6 ( $\text{CH}_3$ ), 52.6 ( $\text{CH}_3$ ), 31.6 ( $\text{CH}_3$ )

**IR** (film,  $\text{cm}^{-1}$ ): 1720, 1606, 1421, 1285, 1225, 1131, 990, 915, 861, 602

**HRMS** (ESI-QTOF) calcd for  $C_{12}H_{11}F_3NaO_7S^+$   $[M+Na^+]$  379.0070, found 379.0070

To a stirred solution of **S5** (14.1 mg, 0.0396 mmol) in DMF (200  $\mu$ L) were added tributylvinyltin (12.8  $\mu$ L, 0.0435 mmol) and  $PdCl_2(PPh_3)_2$  (2.8 mg, 0.0040 mmol) at rt. After stirring for 12 h at 100  $^{\circ}C$ , the resulting mixture was quenched with  $H_2O$  at rt and extracted three times with a 1:1 mixture of ethyl acetate and hexane. The combined organic layer was dried over  $Na_2SO_4$ , filtrated, and concentrated. The residue was purified by flash column chromatography on silica gel and  $K_2CO_3$  (5% w/w) (15-30% ethyl acetate/hexane) to give **1d** (5.1 mg, 0.022 mmol, 55%) as a pale yellow oil.

**$^1H$  NMR** ( $CDCl_3$ ): 7.93 (d,  $J$  = 8.7 Hz, 1H), 6.90 (d,  $J$  = 8.7 Hz, 1H), 6.64 (dd,  $J$  = 17.8, 11.8 Hz, 1H), 5.67 (dd,  $J$  = 17.8, 1.6 Hz, 1H), 5.51 (dd,  $J$  = 11.8, 1.6 Hz, 1H), 3.92 (s, 3H), 3.85 (s, 3H), 2.49 (s, 3H)

**$^{13}C$  NMR** ( $CDCl_3$ ): 205.6 (C), 166.1 (C), 160.8 (C), 145.4 (C), 131.4 (CH), 129.2 (CH), 123.3 (C), 122.3 ( $CH_2$ ), 118.9 (C), 109.7 (CH), 55.9 ( $CH_3$ ), 52.2 ( $CH_3$ ), 31.9 ( $CH_3$ )

**IR** (film,  $cm^{-1}$ ): 2923, 2362, 1713, 1573, 1435, 1269, 1196, 1149, 1041, 986

**HRMS** (ESI-QTOF) calcd for  $C_{13}H_{14}NaO_4$   $[M+Na^+]$  257.0784, found 257.0788

## Synthesis of styrene **1e**

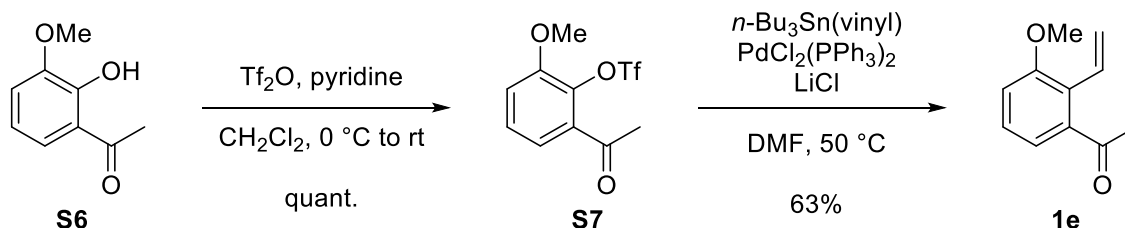

To a stirred solution of **S6** (93.4 mg, 0.562 mmol) in  $\text{CH}_2\text{Cl}_2$  (5.6 mL) were added pyridine (90.5  $\mu\text{L}$ , 1.12 mmol) and  $\text{Tf}_2\text{O}$  (120  $\mu\text{L}$ , 0.844 mmol) at  $0\text{ }^\circ\text{C}$ . After stirring for 150 min at rt, the resulting mixture was quenched with 1N HCl at the same temperature and extracted three times with  $\text{CH}_2\text{Cl}_2$ . The combined organic layer was dried over  $\text{Na}_2\text{SO}_4$ , filtrated, and concentrated. The residue was purified by flash column chromatography on silica gel (20-35% ethyl acetate/hexane) to give **S7** (175 mg, quant.) as a yellow oil.

$^1\text{H NMR}$  ( $\text{CDCl}_3$ ): 7.40 (dd,  $J = 8.4, 7.8\text{ Hz}$ , 1H), 7.27 (dd,  $J = 7.8, 1.5\text{ Hz}$ , 1H), 7.19 (dd,  $J = 8.4, 1.5\text{ Hz}$ , 1H), 3.93 (s, 3H), 2.61 (s, 3H)

$^{13}\text{C NMR}$  ( $\text{CDCl}_3$ ): 197.2 (C), 151.8 (C), 135.8 (C), 133.8 (C), 128.8 (CH), 121.0 (CH), 118.6 ( $\text{CF}_3$ , q,  $J = 318.5\text{ Hz}$ ), 116.2 (CH), 56.4 ( $\text{CH}_3$ ), 29.6 ( $\text{CH}_3$ )

IR (film,  $\text{cm}^{-1}$ ): 1698, 1577, 1420, 1286, 1204, 1134, 1044, 885, 784, 598

HRMS (ESI-QTOF) calcd for  $\text{C}_{10}\text{H}_9\text{F}_3\text{NaO}_5\text{S}^+$  [ $\text{M}+\text{Na}^+$ ] 321.0015, found 321.0029

To a stirred solution of **S7** (18.6 mg, 0.0624 mmol) in  $\text{DMF}$  (250  $\mu\text{L}$ ) were added tributylvinyltin (22.0  $\mu\text{L}$ , 0.0748 mmol),  $\text{LiCl}$  (7.9 mg, 0.187 mmol), and  $\text{PdCl}_2(\text{PPh}_3)_2$  (4.4 mg, 0.0063 mmol) at rt. After stirring for 13 h at  $50\text{ }^\circ\text{C}$ , the resulting mixture was quenched with  $\text{H}_2\text{O}$  at rt and extracted three times with a 1:1 mixture of ethyl acetate and hexane. The combined organic layer was dried over  $\text{Na}_2\text{SO}_4$ , filtrated, and concentrated. The residue was purified by flash column chromatography on silica gel and  $\text{K}_2\text{CO}_3$  (5% w/w) (10-25% ethyl acetate/hexane) to give **1e** (6.9 mg, 0.039 mmol, 63%) as a pale yellow oil.

$^1\text{H NMR}$  ( $\text{CDCl}_3$ ): 7.28 (dd,  $J = 7.6, 7.1\text{ Hz}$ , 1H), 6.97 (d,  $J = 7.6\text{ Hz}$ , 1H), 6.96 (d,  $J = 7.1\text{ Hz}$ , 1H), 6.96 (dd,  $J = 17.4, 11.8\text{ Hz}$ , 1H), 5.48 (dd,  $J = 11.8, 1.5\text{ Hz}$ , 1H), 5.45 (dd,  $J = 17.4, 1.5\text{ Hz}$ , 1H), 3.86 (s, 3H), 2.46 (s, 3H)

$^{13}\text{C NMR}$  ( $\text{CDCl}_3$ ): 205.3 (C), 157.2 (C), 142.3 (C), 131.1 (CH), 128.4 (CH), 125.4 (C), 121.1 ( $\text{CH}_2$ ), 119.2 (CH), 112.3 (CH), 55.8 ( $\text{CH}_3$ ), 31.0 ( $\text{CH}_3$ )

IR (film,  $\text{cm}^{-1}$ ): 2925, 2360, 1691, 1575, 1458, 1353, 1264, 1047, 924, 754

HRMS (ESI-QTOF) calcd for  $\text{C}_{11}\text{H}_{12}\text{NaO}_2^+$  [ $\text{M}+\text{Na}^+$ ] 199.0730, found 199.0730

## Synthesis of styrene **1g**

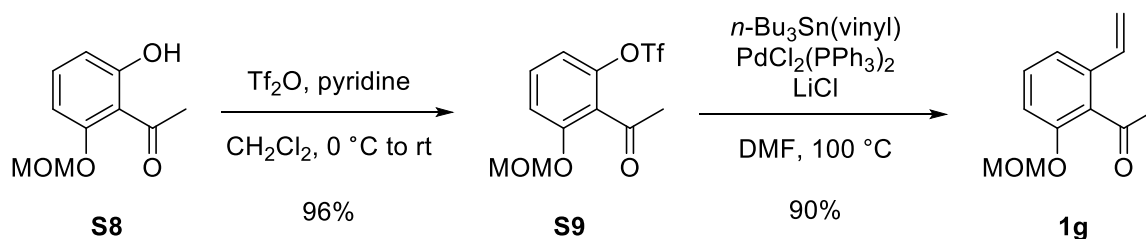

To a stirred solution of **S8** (6.04 g, 30.8 mmol) in  $\text{CH}_2\text{Cl}_2$  (92 mL) were added pyridine (4.96 mL, 61.6 mmol) and  $\text{Tf}_2\text{O}$  (6.20 mL, 37.0 mmol) at 0 °C. After stirring for 2 h at rt, the resulting mixture was quenched with 1N HCl at the same temperature and extracted three times with  $\text{CH}_2\text{Cl}_2$ . The combined organic layer was dried over  $\text{Na}_2\text{SO}_4$ , filtrated, and concentrated. The residue was purified by flash column chromatography on silica gel (10-20% ethyl acetate/hexane) to give **S9** (9.72 g, 29.6 mmol, 96.1 %) as a yellow oil.

**$^1\text{H}$  NMR** ( $\text{CDCl}_3$ ): 7.40 (dd,  $J = 8.7, 8.2$  Hz, 1H), 7.22 (d,  $J = 8.2$  Hz, 1H), 6.99 (d,  $J = 8.7$  Hz, 1H), 5.24 (s, 2H), 3.49 (s, 3H), 2.59 (s, 3H)

**$^{13}\text{C}$  NMR** ( $\text{CDCl}_3$ ): 198.2 (C), 155.4 (C), 145.3 (C), 131.5 (CH), 125.6 (C), 118.4 ( $\text{CF}_3$ , q,  $J = 318.5$  Hz), 114.9 (CH), 114.5 (CH), 94.6 ( $\text{CH}_2$ ), 56.6 ( $\text{CH}_3$ ), 32.0 ( $\text{CH}_3$ )

**IR** (film,  $\text{cm}^{-1}$ ): 1707, 1608, 1425, 1216, 1145, 1026, 926, 831, 741, 596

**HRMS** (ESI-QTOF) calcd for  $\text{C}_{11}\text{H}_{11}\text{F}_3\text{NaO}_6\text{S}^+$  [ $\text{M} + \text{Na}^+$ ] 351.0121, found 351.0125

To a stirred solution of **S9** (9.70 g, 29.6 mmol) in DMF (90 mL) were added tri-*n*-butylvinyltin (8.69 mL, 29.6 mmol), LiCl (3.14 g, 74.1 mmol) and  $\text{PdCl}_2(\text{PPh}_3)_2$  (415 mg, 0.593 mmol) at rt. After stirring for 1 h at 100 °C, the resulting mixture was quenched with  $\text{H}_2\text{O}$  at rt and extracted three times with a 1:1 mixture of ethyl acetate and hexane. The combined organic layer was dried over  $\text{Na}_2\text{SO}_4$ , filtrated, and concentrated. The residue was purified by flash column chromatography on a mixture of silica gel and  $\text{K}_2\text{CO}_3$  (5% w/w) (5-30% ethyl acetate/hexane) to give **1g** (5.50 g, 26.7 mmol, 90.1 %) as a yellow oil.

**$^1\text{H}$  NMR** ( $\text{CDCl}_3$ ): 7.28 (dd,  $J = 8.2, 7.3$  Hz, 1H), 7.22 (dd,  $J = 7.3, 0.9$  Hz, 1H), 7.05 (dd,  $J = 8.2, 0.9$  Hz, 1H), 6.65 (dd,  $J = 17.4, 11.0$  Hz, 1H), 5.70 (dd,  $J = 17.4, 0.9$  Hz, 1H), 5.31 (dd,  $J = 11.0, 0.9$  Hz, 1H), 5.18 (s, 2H), 3.46 (s, 3H), 2.52 (s, 3H)

**$^{13}\text{C}$  NMR** ( $\text{CDCl}_3$ ): 205.0 (C), 153.4 (C), 135.4 (C), 133.2 (CH), 131.2 (C), 129.9 (CH), 119.1 (CH), 117.2 ( $\text{CH}_2$ ), 113.5 (CH), 94.5 ( $\text{CH}_2$ ), 56.2 ( $\text{CH}_3$ ), 32.6 ( $\text{CH}_3$ )

**IR** (film,  $\text{cm}^{-1}$ ): 2912, 1700, 1568, 1464, 1353, 1249, 1155, 995, 920, 802

**HRMS** (ESI-QTOF) calcd for  $\text{C}_{12}\text{H}_{14}\text{NaO}_3^+$  [ $\text{M} + \text{Na}^+$ ] 229.0835, found 229.0844

## Synthesis of styrene **1f**

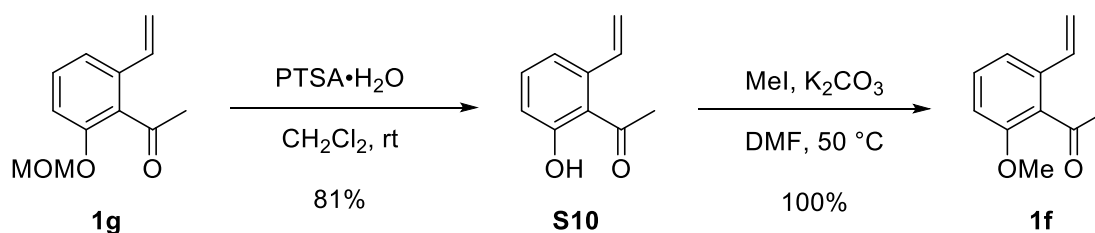

To a stirred solution of **1g** (5.50 g, 26.7 mmol) in CH<sub>2</sub>Cl<sub>2</sub> (107 mL) was added PTSA·H<sub>2</sub>O (1.02 g, 5.35 mmol) at rt. After stirring for 2 h at rt, the resulting mixture was quenched with aqueous NaHCO<sub>3</sub> at the same temperature and extracted three times with CH<sub>2</sub>Cl<sub>2</sub>. The combined organic layer was dried over Na<sub>2</sub>SO<sub>4</sub>, filtrated, and concentrated. The residue was purified by flash column chromatography on silica gel (5-15% ethyl acetate/hexane) to give **S10** (3.50 g, 21.6 mmol, 80.8 %) as a yellow oil.

**<sup>1</sup>H NMR** (CDCl<sub>3</sub>): 12.09 (s, 1H), 7.37 (dd, *J* = 8.4, 7.8 Hz, 1H), 7.04 (dd, *J* = 17.1, 10.9 Hz, 1H), 6.92 (d, *J* = 8.4 Hz, 1H), 6.89 (d, *J* = 7.8 Hz, 1H), 5.57 (dd, *J* = 17.1, 0.9 Hz, 1H), 5.41 (dd, *J* = 10.9, 0.9 Hz, 1H), 2.60 (s, 3H)

**<sup>13</sup>C NMR** (CDCl<sub>3</sub>): 206.1 (C), 161.8 (C), 141.5 (C), 138.1 (CH), 134.7 (CH), 120.2 (CH), 119.9 (C), 118.1 (CH<sub>2</sub>), 117.7 (CH), 33.0 (CH<sub>3</sub>)

**IR** (film, cm<sup>-1</sup>): 2920, 1627, 1444, 1331, 1248, 1215, 1007, 930, 806, 742

**HRMS** (ESI-QTOF) calcd for C<sub>10</sub>H<sub>10</sub>NaO<sub>2</sub><sup>+</sup> [*M* + Na<sup>+</sup>] 185.0573, found 185.0574

To a stirred solution of **S10** (37.2 mg, 0.229 mmol) in DMF (1.1 mL) were added K<sub>2</sub>CO<sub>3</sub> (95.1 mg, 0.688 mmol) and MeI (21.4 μL, 0.344 mmol) at rt. After stirring for 2 h at 50 °C, the resulting mixture was quenched with H<sub>2</sub>O at rt and extracted three times with a 1:1 mixture of ethyl acetate and hexane. The combined organic layer was dried over Na<sub>2</sub>SO<sub>4</sub>, filtrated, and concentrated. The residue was purified by flash column chromatography on silica gel (10-20% ethyl acetate/hexane) to give **1f** (40.2 mg, 0.228 mmol, 99.6%) as a pale yellow oil.

**<sup>1</sup>H NMR** (CDCl<sub>3</sub>): 7.30 (dd, *J* = 8.3, 7.8 Hz, 1H), 7.17 (d, *J* = 7.8 Hz, 1H), 6.83 (d, *J* = 8.3 Hz, 1H), 6.66 (dd, *J* = 17.4, 11.0 Hz, 1H), 5.70 (d, *J* = 17.4 Hz, 1H), 5.30 (d, *J* = 11.0 Hz, 1H), 3.83 (s, 3H), 2.50 (s, 3H)

**<sup>13</sup>C NMR** (CDCl<sub>3</sub>): 205.3 (C), 156.0 (C), 135.4 (C), 133.3 (CH), 130.5 (C), 130.0 (CH), 118.0 (CH), 117.2 (CH<sub>2</sub>), 109.9 (CH), 55.7 (CH<sub>3</sub>), 32.5 (CH<sub>3</sub>)

**IR** (film, cm<sup>-1</sup>): 2923, 1698, 1568, 1465, 1351, 1262, 1071, 919, 798, 744

**HRMS** (ESI-QTOF) calcd for C<sub>11</sub>H<sub>12</sub>NaO<sub>2</sub><sup>+</sup> [*M*+Na<sup>+</sup>] 199.0730, found 199.0736

## Synthesis of styrene **1h**

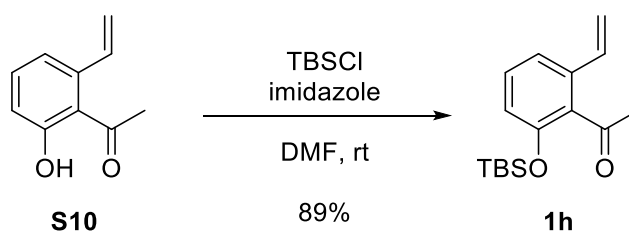

To a stirred solution of **S10** (3.40 g, 21.0 mmol) in DMF (63 mL) were added imidazole (2.85 g, 41.9 mmol) and TBSCl (3.79 g, 25.2 mmol) at rt. After stirring for 4 h at rt, the resulting mixture was quenched with H<sub>2</sub>O at the same temperature and extracted three times with a 1:1 mixture of ethyl acetate and hexane. The combined organic layer was dried over Na<sub>2</sub>SO<sub>4</sub>, filtrated, and concentrated. The residue was purified by flash column chromatography on silica gel (0-15% ethyl acetate/hexane) to give **1h** (5.16 g, 18.7 mmol, 89.0 %) as a pale yellow oil.

**<sup>1</sup>H NMR** (CDCl<sub>3</sub>): 7.20 (dd, *J* = 7.9, 7.6 Hz, 1H), 7.16 (dd, *J* = 7.9, 1.6 Hz, 1H), 6.75 (dd, *J* = 7.6, 1.6 Hz, 1H), 6.63 (dd, *J* = 17.4, 10.8 Hz, 1H), 5.68 (dd, *J* = 17.4, 0.9 Hz, 1H), 5.28 (dd, *J* = 10.8, 0.9 Hz, 1H), 2.49 (s, 3H), 0.96 (s, 9H), 0.21 (s, 6H)

**<sup>13</sup>C NMR** (CDCl<sub>3</sub>): 205.4 (C), 151.8 (C), 135.6 (C), 133.4 (CH), 133.2 (C), 129.6 (CH), 118.4 (CH), 118.1 (CH), 116.9 (CH), 32.6 (CH<sub>3</sub>), 25.6 (CH<sub>3</sub>), 18.1 (C), -4.3 (CH<sub>3</sub>)

**IR** (film, cm<sup>-1</sup>): 2934, 2860, 1705, 1569, 1465, 1354, 1278, 977, 838, 745

**HRMS** (ESI-QTOF) calcd for C<sub>16</sub>H<sub>24</sub>NaO<sub>2</sub>Si<sup>+</sup> [*M* + Na<sup>+</sup>] 299.1438, found 299.1437



## Synthesis of compound 3a

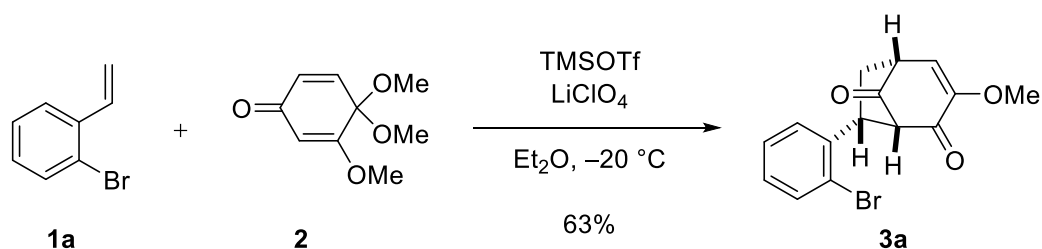

To a stirred solution of **1a** (70.5 mg, 0.385 mmol) in Et<sub>2</sub>O (1.0 mL) were added **2** (35.4 mg, 0.193 mmol), LiClO<sub>4</sub> (307 mg, 2.89 mmol), and TMSOTf (38  $\mu$ L, 0.21 mmol) at -20 °C. After stirring for 10 min at -20 °C, the resulting mixture was quenched with aqueous NaHCO<sub>3</sub> at the same temperature and extracted four times with ethyl acetate. The combined organic layer was dried over Na<sub>2</sub>SO<sub>4</sub>, filtrated, and concentrated. The residue was purified by flash column chromatography on silica gel twice (30-60% ethyl acetate/hexane) (100% CH<sub>2</sub>Cl<sub>2</sub>) to give **3a** (39.2 mg, 0.122 mmol, 63.2%) as an orange foam.

**<sup>1</sup>H NMR** (CDCl<sub>3</sub>): 7.55 (d, *J* = 8.0 Hz, 1H), 7.21 (dd, *J* = 7.8, 7.8 Hz, 1H), 7.07 (dd, *J* = 8.0, 7.8 Hz, 1H), 6.93 (7.8 Hz, 1H), 6.48 (d, *J* = 8.4 Hz, 1H), 4.35 (ddd, *J* = 10.7, 7.1, 4.6 Hz, 1H), 3.98 (dd, *J* = 7.1, 2.1 Hz, 1H), 3.70 (s, 3H), 3.44 (ddd, *J* = 8.4, 6.3, 2.1 Hz, 1H), 2.72 (ddd, *J* = 13.5, 10.7, 6.3 Hz, 1H), 2.24 (dd, *J* = 13.5, 4.6 Hz, 1H)

**<sup>13</sup>C NMR** (CDCl<sub>3</sub>): 200.3 (C), 198.6 (C), 155.2 (C), 137.6 (C), 133.2 (CH), 128.9 (CH), 128.0 (CH), 127.7 (CH), 126.1 (C), 118.0 (CH), 66.8 (CH), 55.8 (CH<sub>3</sub>), 46.5 (CH), 38.3 (CH), 32.6 (CH<sub>3</sub>)

**IR** (film, cm<sup>-1</sup>): 2936, 1764, 1688, 1605, 1465, 1362, 1217, 1122, 1023, 756

**HRMS** (ESI-QTOF) calcd for C<sub>15</sub>H<sub>13</sub>BrNaO<sub>3</sub><sup>+</sup> [M+Na<sup>+</sup>] 342.9940, found 342.9936

## Synthesis of compound 3b

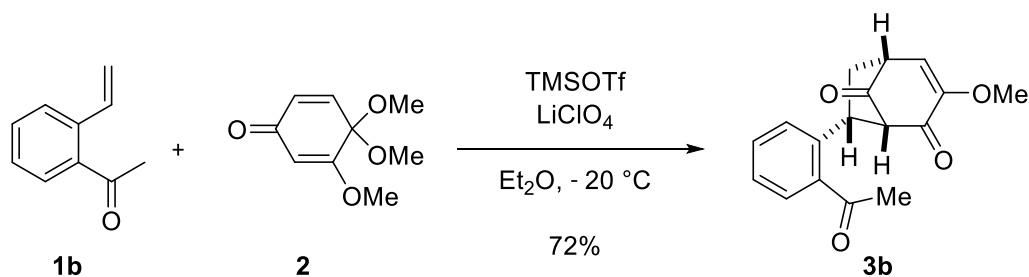

To a stirred solution of **1b** (90.6 mg, 0.620 mmol) in Et<sub>2</sub>O (1.6 mL) were added **2** (57.0 mg, 0.310 mmol), LiClO<sub>4</sub> (485 mg, 4.65 mmol), and TMSOTf (61.6  $\mu$ L, 0.341 mmol) at  $-20\text{ }^\circ\text{C}$ . After stirring for 10 min at  $-20\text{ }^\circ\text{C}$ , the resulting mixture was quenched with aqueous NaHCO<sub>3</sub> at the same temperature and extracted four times with ethyl acetate. The combined organic layer was dried over Na<sub>2</sub>SO<sub>4</sub>, filtrated, and concentrated. The residue was purified by flash column chromatography on silica gel (40-60% ethyl acetate/hexane) to give **3b** (63.6 mg, 0.224 mmol, 72.2%) as a red foam.

**<sup>1</sup>H NMR** (CDCl<sub>3</sub>): 7.68 (dd,  $J = 7.7, 1.4$  Hz, 1H), 7.39 (ddd,  $J = 7.7, 7.6, 1.4$  Hz, 1H), 7.30 (ddd,  $J = 7.7, 7.7, 1.1$  Hz, 1H), 7.08 (dd,  $J = 7.6, 1.1$  Hz, 1H), 6.47 (d,  $J = 8.2$  Hz, 1H), 4.74 (ddd,  $J = 10.9, 6.9, 6.2$  Hz, 1H), 3.96 (dd,  $J = 6.9, 1.9$  Hz, 1H), 3.71 (s, 3H), 3.42 (ddd,  $J = 8.2, 6.4, 1.9$  Hz, 1H), 2.69 (ddd,  $J = 13.7, 10.9, 6.4$  Hz, 1H), 2.63 (s, 3H), 2.26 (dd,  $J = 13.7, 6.2$  Hz, 1H)

**<sup>13</sup>C NMR** (CDCl<sub>3</sub>): 202.3 (C), 200.6 (C), 190.1 (C), 155.3 (C), 138.9 (C), 138.2 (C), 131.7 (CH), 129.6 (CH), 128.0 (CH), 127.1 (CH), 118.1 (CH), 68.7 (CH), 55.8 (CH<sub>3</sub>), 46.8 (CH), 34.7 (CH), 33.1 (CH<sub>2</sub>), 30.0 (CH<sub>3</sub>)

**IR** (film, cm<sup>-1</sup>): 2360, 1764, 1685, 1604, 1456, 1360, 1248, 1122, 760, 675

**HRMS** (ESI-QTOF) calcd for C<sub>17</sub>H<sub>16</sub>NaO<sub>4</sub><sup>+</sup> [M+Na<sup>+</sup>] 307.0941, found 307.0951

## Synthesis of compound 3f

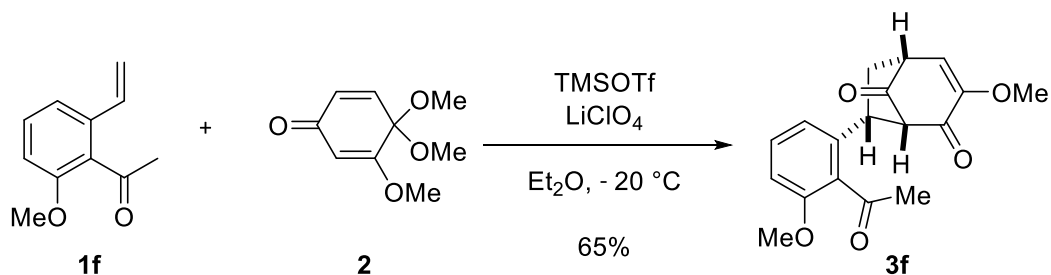

To a stirred solution of **1f** (33.2 mg, 0.188 mmol) in Et<sub>2</sub>O (470  $\mu$ L) were added **2** (17.3 mg, 0.0942 mmol), LiClO<sub>4</sub> (150 mg, 1.41 mmol), and TMSOTf (18.7  $\mu$ L, 0.104 mmol) at  $-20\text{ }^\circ\text{C}$ . After stirring for 10 min at  $-20\text{ }^\circ\text{C}$ , the resulting mixture was quenched with aqueous NaHCO<sub>3</sub> at the same temperature and extracted four times with ethyl acetate. The combined organic layer was dried over Na<sub>2</sub>SO<sub>4</sub>, filtrated, and concentrated. The residue was purified by flash column chromatography on silica gel (30-60% ethyl acetate/hexane) to give **3f** (19.2 mg, 0.0611 mmol, 64.8%) as an orange foam.

**<sup>1</sup>H NMR** (CDCl<sub>3</sub>): 7.24 (dd,  $J = 8.3, 8.2$  Hz, 1H), 6.80 (d,  $J = 8.3$  Hz, 1H), 6.55 (d,  $J = 8.2$  Hz, 1H), 6.45 (d,  $J = 8.3$  Hz, 1H), 3.97 (ddd,  $J = 10.7, 6.8, 6.1$  Hz, 1H), 3.81 (s, 3H), 3.72 (s, 3H), 3.69 (dd,  $J = 6.8, 1.8$  Hz, 1H), 3.38 (ddd,  $J = 8.3, 6.4, 1.8$  Hz, 1H), 2.68 (ddd,  $J = 13.7, 10.7, 6.4$  Hz, 1H), 2.58 (s, 3H), 2.20 (dd,  $J = 13.7, 6.1$  Hz, 1H)

**<sup>13</sup>C NMR** (CDCl<sub>3</sub>): 205.8 (C), 200.1 (C), 189.8 (C), 156.4 (C), 155.3 (C), 136.2 (C), 132.2 (C), 130.5 (CH), 119.2 (CH), 118.0 (CH), 110.0 (CH), 68.8 (CH), 55.8 (CH<sub>3</sub>), 55.6 (CH<sub>3</sub>), 46.4 (CH), 34.8 (CH), 33.2 (CH<sub>2</sub>), 32.5 (CH<sub>3</sub>)

**IR** (film, cm<sup>-1</sup>): 2943, 1763, 1689, 1602, 1466, 1358, 1264, 1078, 1002, 749

**HRMS** (ESI-QTOF) calcd for C<sub>18</sub>H<sub>18</sub>NaO<sub>5</sub><sup>+</sup> [ $M+Na^+$ ] 337.1046, found 337.1043

## Synthesis of compound 3h

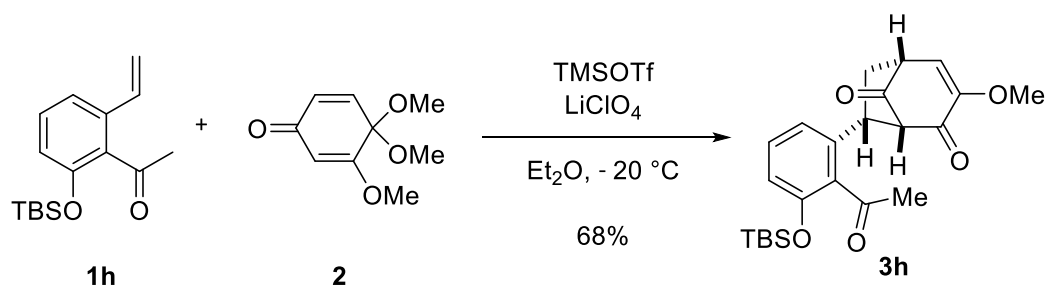

To a stirred solution of **1h** (5.26 g, 19.0 mmol) in Et<sub>2</sub>O (48 mL) were added **2** (1.75 g, 9.52 mmol), LiClO<sub>4</sub> (15.2 g, 143 mmol) and TMSOTf (1.89 mL, 10.5 mmol) at –20 °C. After stirring for 10 min at –20 °C, the resulting mixture was quenched with aqueous NaHCO<sub>3</sub> at the same temperature and extracted four times with ethyl acetate. The combined organic layer was dried over Na<sub>2</sub>SO<sub>4</sub>, filtrated, and concentrated. The residue was purified by flash column chromatography on silica gel (30-60% ethyl acetate/hexane) to give **3h** (2.69 g, 6.49 mmol, 68.2 %) as a red foam.

**<sup>1</sup>H NMR** (CDCl<sub>3</sub>): 7.13 (dd, *J* = 8.2, 8.0 Hz, 1H), 6.71 (d, *J* = 8.0 Hz, 1H), 6.54 (d, *J* = 8.0 Hz, 1H), 6.43 (d, 8.2 Hz, 1H), 3.93 (ddd, *J* = 10.8, 7.3, 5.5 Hz, 1H), 3.71 (s, 3H), 3.67 (dd, *J* = 7.3, 1.8 Hz, 1H), 3.38 (ddd, *J* = 8.2, 6.4, 1.8 Hz, 1H), 2.67 (ddd, *J* = 13.6, 10.8, 6.4 Hz, 1H), 2.54 (s, 3H), 2.20 (dd, *J* = 13.6, 5.5 Hz, 1H), 0.97 (s, 9H), 0.21 (s, 6H)

**<sup>13</sup>C NMR** (CDCl<sub>3</sub>): 206.2 (C), 200.2 (C), 189.7 (C), 155.3 (C), 152.4 (C), 136.3 (C), 135.0 (C), 130.0 (CH), 119.7 (CH), 118.2 (CH), 117.9 (CH), 68.8 (CH), 55.8 (CH<sub>3</sub>), 46.5 (CH), 34.8 (CH), 33.2 (CH<sub>2</sub>), 32.8 (CH<sub>3</sub>), 25.6 (CH<sub>3</sub>), 18.1 (C), –4.2 (CH<sub>3</sub>), –4.4 (CH<sub>3</sub>)

**IR** (film, cm<sup>–1</sup>): 2934, 2360, 1765, 1692, 1601, 1463, 1259, 1126, 889, 834

**HRMS** (ESI-QTOF) calcd for C<sub>23</sub>H<sub>30</sub>NaO<sub>5</sub>Si<sup>+</sup> [*M* + Na<sup>+</sup>] 437.1755, found 437.1743

## Synthesis of alcohols **4** and **S11**

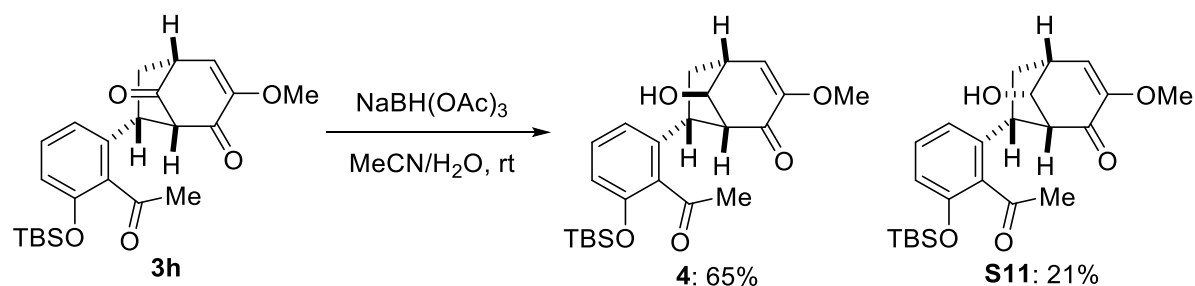

To a stirred solution of **3h** (2.68 g, 6.46 mmol) in MeCN (123.5 mL) and  $\text{H}_2\text{O}$  (6.5 mL) was added  $\text{NaBH}(\text{OAc})_3$  (4.11 g, 19.4 mmol) at rt. After stirring for 12 h at rt, the resulting mixture was quenched with  $\text{H}_2\text{O}$  at the same temperature and extracted three times with ethyl acetate. The combined organic layer was dried over  $\text{Na}_2\text{SO}_4$ , filtrated, and concentrated. The residue was purified by flash column chromatography on silica gel (50-70% ethyl acetate/hexane) to give **4** (1.75 g, 4.20 mmol, 65.0 %) as a pink foam and its diastereomer **S11** (573 mg, 1.37 mmol, 21.3%) as a pink foam, respectively.

### Data for alcohol **4**

$^1\text{H NMR}$  ( $\text{CDCl}_3$ ): 7.08 (dd,  $J = 8.0, 8.0$  Hz, 1H), 6.64 (d,  $J = 8.0$  Hz, 1H), 6.57 (d,  $J = 8.0$  Hz, 1H), 5.98 (dd  $J = 7.3, 1.1$  Hz, 1H), 4.35 (ddd,  $J = 6.6, 4.5, 1.1$  Hz, 1H), 3.81 (ddd,  $J = 10.5, 5.0, 4.8$  Hz, 1H), 3.68 (s, 3H), 3.16 (ddd,  $J = 6.6, 4.8, 1.4$  Hz, 1H), 3.06 (dddd,  $J = 7.3, 5.9, 4.5, 1.4$  Hz, 1H), 2.59 (s, 3H), 2.49 (ddd,  $J = 13.7, 10.5, 5.9$  Hz, 1H), 2.08 (dd,  $J = 13.7, 5.0$  Hz, 1H), 0.95 (s, 9H), 0.20 (s, 3H), 0.16 (s, 3H)

$^{13}\text{C NMR}$  ( $\text{CDCl}_3$ ): 207.0 (C), 193.2 (C), 154.1 (C), 152.0 (C), 137.4 (C), 134.5 (C), 129.7 (CH), 119.7 (CH), 117.5 (CH), 114.8 (CH), 79.7 (CH), 62.2 (CH), 55.1 ( $\text{CH}_3$ ), 40.6 (CH), 36.5 (CH), 34.2 ( $\text{CH}_2$ ), 32.9 ( $\text{CH}_3$ ), 25.6 ( $\text{CH}_3$ ), 18.1 (C), -4.2 ( $\text{CH}_3$ ), -4.4 ( $\text{CH}_3$ )

IR (film,  $\text{cm}^{-1}$ ): 3445, 2954, 2361, 1691, 1577, 1464, 1259, 1128, 897, 838

HRMS (ESI-QTOF) calcd for  $\text{C}_{23}\text{H}_{32}\text{NaO}_5\text{Si}^+ [\text{M} + \text{Na}^+]$  439.1911, found 439.1905

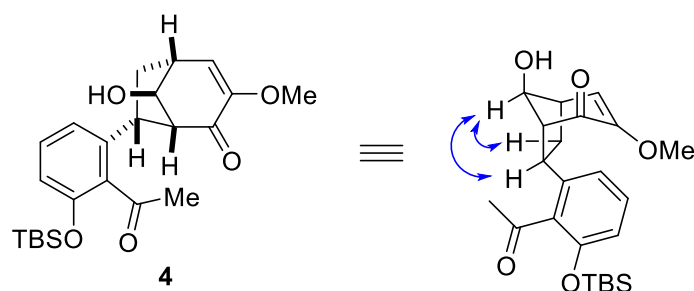

### Data for alcohol **S11**

$^1\text{H NMR}$  ( $\text{CDCl}_3$ ): 7.06 (dd,  $J = 8.2, 7.8$  Hz, 1H), 6.63 (d,  $J = 8.2$  Hz, 1H), 6.53 (d,  $J = 7.8$  Hz, 1H), 6.21 (d,  $J = 7.8$  Hz, 1H), 4.14 (m, 1H), 4.00 (ddd,  $J = 10.5, 6.7, 4.4$  Hz, 1H), 3.64 (s, 3H), 3.21 (d,  $J = 6.7$  Hz, 1H), 2.98 (dd,  $J = 7.8, 6.1$  Hz, 1H), 2.71 (ddd,  $J = 13.2, 10.5, 6.1$  Hz, 1H), 2.59 (s, 3H), 2.49 (br, 1H), 2.00 (dd,  $J = 13.2, 4.4$  Hz, 1H), 0.95 (s, 9H),

0.19 (s, 3H), 0.18 (s, 3H)

**<sup>13</sup>C NMR** (CDCl<sub>3</sub>): 206.8 (C), 194.3 (C), 154.3 (C), 151.9 (C), 137.6 (C), 134.8 (C), 129.6 (CH), 120.1 (CH), 119.8 (CH), 117.2 (CH), 79.0 (CH), 65.2 (CH), 55.3 (CH<sub>3</sub>), 42.9 (CH), 38.1 (CH), 34.2 (CH<sub>2</sub>), 32.9 (CH<sub>3</sub>), 25.6 (CH<sub>3</sub>), 18.1 (C), -4.3 (CH<sub>3</sub>), -4.4 (CH<sub>3</sub>)

**IR** (film, cm<sup>-1</sup>): 3449, 2954, 1691, 1615, 1463, 1257, 1126, 1057, 896, 835

**HRMS** (ESI-QTOF) calcd for C<sub>23</sub>H<sub>32</sub>NaO<sub>5</sub>Si<sup>+</sup> [M+Na<sup>+</sup>] 439.1911, found 439.1926

## Synthesis of alcohol 6

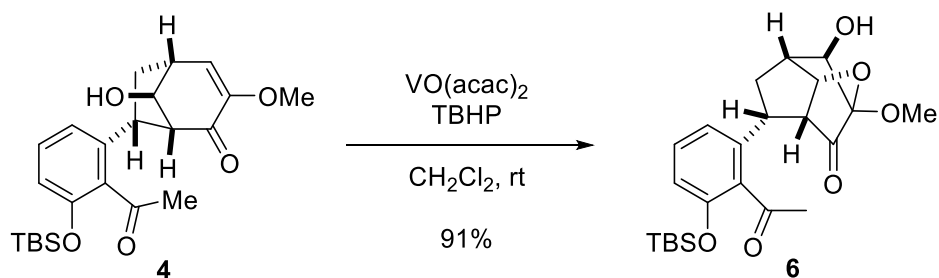

To a stirred solution of **4** (1.69 g, 4.06 mmol) in  $\text{CH}_2\text{Cl}_2$  (41 mL) were added  $\text{VO(acac)}_2$  (108 mg, 0.406 mmol) and 70% TBHP solution in  $\text{H}_2\text{O}$  (783 mL, 6.09 mmol) at rt. After stirring for 3 h at rt, the resulting mixture was quenched with aqueous  $\text{Na}_2\text{S}_2\text{O}_3$  at the same temperature and extracted three times with  $\text{CH}_2\text{Cl}_2$ . The combined organic layer was dried over  $\text{Na}_2\text{SO}_4$ , filtrated, and concentrated. The residue was purified by flash column chromatography on silica gel (40-60% ethyl acetate/hexane) to give **6** (1.60 g, 3.70 mmol, 91.1 %) as a yellow foam.

**$^1\text{H}$  NMR** ( $\text{CDCl}_3$ ): 7.20 (dd,  $J = 8.2, 8.0$  Hz, 1H), 6.75 (d,  $J = 8.2$  Hz, 1H), 6.70 (d,  $J = 8.0$  Hz, 1H), 5.15 (dd,  $J = 6.2, 5.5$  Hz, 1H), 3.73 (d,  $J = 3.2$  Hz, 1H), 3.51 (s, 3H), 3.43 (ddd,  $J = 10.9, 8.4, 7.4$  Hz, 1H), 2.77 (dd,  $J = 7.4, 5.5$  Hz, 1H), 2.72 (dd,  $J = 8.3, 6.2$  Hz, 1H), 2.52 (s, 3H), 2.47 (m, 1H), 2.26 (d,  $J = 3.2$  Hz, 1H), 2.11 (dd,  $J = 14.7, 8.4$  Hz, 1H), 0.96 (s, 9H), 0.22 (s, 3H), 0.21 (s, 3H)

**$^{13}\text{C}$  NMR** ( $\text{CDCl}_3$ ): 208.3 (C), 206.5 (C), 152.0 (C), 136.3 (C), 134.2 (C), 129.3 (CH), 120.3 (CH), 117.7 (CH), 108.2 (C), 80.2 (CH), 77.2 (CH), 55.4 (CH), 54.6 ( $\text{CH}_3$ ), 49.5 (CH), 41.4 (CH), 33.8 ( $\text{CH}_2$ ), 32.8 ( $\text{CH}_3$ ), 25.6 ( $\text{CH}_3$ ), 18.1 (C),  $-4.3$  ( $\text{CH}_3$ )

**IR** (film,  $\text{cm}^{-1}$ ): 2954, 2360, 1766, 1696, 1578, 1464, 1278, 1154, 995, 834

**HRMS** (ESI-QTOF) calcd for  $\text{C}_{23}\text{H}_{32}\text{NaO}_6\text{Si}^+$  [ $\text{M} + \text{Na}^+$ ] 455.1860, found 455.1860

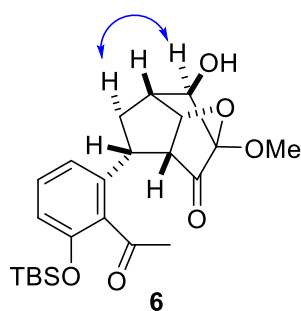

Selected NOESY correlation of **6**

## Synthesis of MOM ether **7**

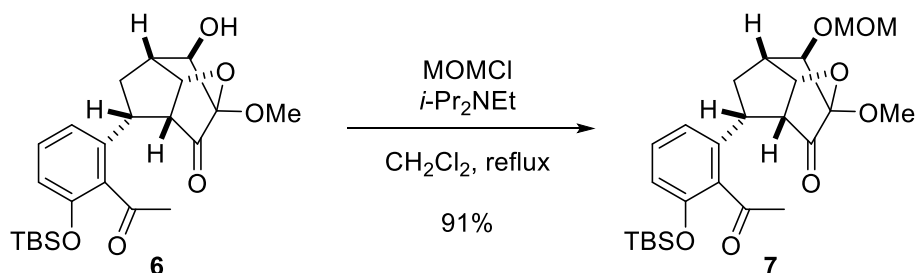

To a stirred solution of **6** (1.56 g, 3.61 mmol) in CH<sub>2</sub>Cl<sub>2</sub> (14.5 mL) were added *i*-Pr<sub>2</sub>NEt (1.26 mL, 7.21 mmol) and MOMCl (411  $\mu$ L, 5.41 mmol) at rt. After stirring for 8 h at reflux, the resulting mixture was quenched with H<sub>2</sub>O at rt and extracted three times with CH<sub>2</sub>Cl<sub>2</sub>. The combined organic layer was dried over Na<sub>2</sub>SO<sub>4</sub>, filtrated, and concentrated. The residue was purified by flash column chromatography on silica gel (20-50% ethyl acetate/hexane) to give **7** (1.56 g, 3.27 mmol, 90.7 %) as a yellow foam.

**<sup>1</sup>H NMR** (CDCl<sub>3</sub>): 7.21 (dd, *J* = 8.5, 8.0 Hz, 1H), 6.76 (d, *J* = 8.5 Hz, 1H), 6.74 (d, *J* = 8.0 Hz, 1H), 5.16 (dd, *J* = 6.2, 5.7 Hz, 1H), 4.85 (d, *J* = 6.7 Hz, 1H), 4.72 (d, *J* = 6.7 Hz, 1H), 3.72 (s, 1H), 3.48 (s, 3H), 3.46 (m, 1H), 3.41 (s, 3H), 2.77 (dd, *J* = 8.7, 6.2 Hz, 1H), 2.72 (dd, *J* = 7.3, 5.7 Hz, 1H), 2.51 (s, 3H), 2.49 (m, 1H), 2.13 (dd, *J* = 14.9, 8.9 Hz, 1H), 0.96 (s, 9H), 0.22 (s, 6H)

**<sup>13</sup>C NMR** (CDCl<sub>3</sub>): 208.9 (C), 206.5 (C), 152.0 (C), 136.3 (C), 134.1 (C), 129.4 (CH), 120.4 (CH), 117.7 (CH), 108.7 (C), 95.9 (CH<sub>2</sub>), 80.1 (CH), 79.9 (CH), 55.7 (CH<sub>3</sub>), 55.3 (CH), 54.5 (CH<sub>3</sub>), 48.9 (CH), 41.7 (CH), 34.0 (CH<sub>2</sub>), 32.8 (CH<sub>3</sub>), 25.6 (CH<sub>3</sub>), 18.1 (C), -4.3 (CH<sub>3</sub>)

**IR** (film, cm<sup>-1</sup>): 2952, 1767, 1697, 1577, 1464, 1279, 1152, 1103, 1029, 834

**HRMS** (ESI-QTOF) calcd for C<sub>25</sub>H<sub>36</sub>NaO<sub>7</sub>Si<sup>+</sup> [*M* + Na<sup>+</sup>] 499.2123, found 499.2108



## Synthesis of $\beta$ -hydroxyketone **8**

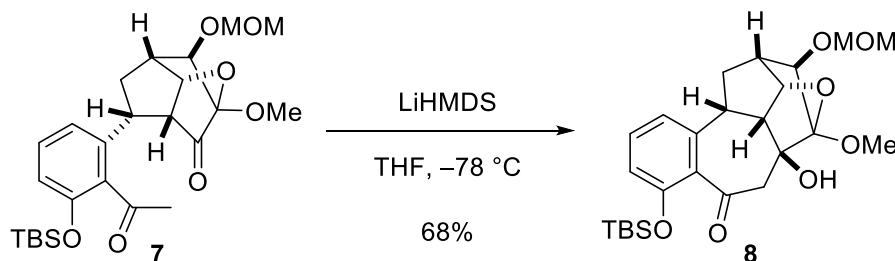

To a stirred solution of **7** (273 mg, 0.573 mmol) in THF (5.7 mL) was added LiHMDS (0.72 M in THF, 2.39 mL, 1.72 mmol) at  $-78\text{ }^{\circ}\text{C}$ . After stirring for 12 h at  $-78\text{ }^{\circ}\text{C}$ , the resulting mixture was quenched with aqueous  $\text{NH}_4\text{Cl}$  at the same temperature and extracted three times with ethyl acetate. The combined organic layer was dried over  $\text{Na}_2\text{SO}_4$ , filtrated, and concentrated. The residue was purified by flash column chromatography on silica gel (40-60% ethyl acetate/hexane) to give **8** (186 mg, 0.390 mmol, 68.1 %) as a yellow foam.

**$^1\text{H}$  NMR** ( $\text{CDCl}_3$ ): 7.17 (dd,  $J = 8.2, 7.8$  Hz, 1H), 6.73 (d,  $J = 8.2$  Hz, 1H), 6.69 (d,  $J = 7.8$  Hz, 1H), 4.86 (dd,  $J = 5.5, 5.0$  Hz, 1H), 4.74 (d,  $J = 6.9$  Hz, 1H), 4.68 (d,  $J = 6.9$  Hz, 1H), 3.84 (s, 3H), 3.81 (s, 1H), 3.48 (ddd,  $J = 11.1, 9.9, 5.5$  Hz, 1H), 3.38 (s, 3H), 3.17 (d,  $J = 11.5$  Hz, 1H), 2.79 (s, 1H), 2.72 (dd,  $J = 5.5, 5.0$  Hz, 1H), 2.65 (d,  $J = 11.5$  Hz, 1H), 2.62-2.51 (m, 2H), 1.85 (dd,  $J = 13.5, 11.1$  Hz), 0.96 (s, 9H), 0.26 (s, 3H), 0.18 (s, 3H)

**$^{13}\text{C}$  NMR** ( $\text{CDCl}_3$ ): 197.4 (C), 153.4 (C), 141.4 (C), 131.3 (CH), 130.6 (C), 123.1 (CH), 118.8 (CH), 110.4 (C), 95.1 ( $\text{CH}_2$ ), 82.8 (CH), 80.1 (CH), 78.0 (C), 56.0 ( $\text{CH}_3$ ), 55.7 (CH), 55.6 ( $\text{CH}_3$ ), 49.3 ( $\text{CH}_2$ ), 47.9 (CH), 44.9 (CH), 36.7 ( $\text{CH}_2$ ), 25.7 ( $\text{CH}_3$ ), 18.2 (C),  $-4.4$  ( $\text{CH}_3$ ),  $-4.4$  ( $\text{CH}_3$ )

**IR** (film,  $\text{cm}^{-1}$ ): 2952, 1695, 1583, 1457, 1285, 1151, 1034, 890, 837, 785

**HRMS** (ESI-QTOF) calcd for  $\text{C}_{25}\text{H}_{37}\text{NaO}_7\text{Si}^+ [\text{M} + \text{Na}^+]$  499.2123, found 499.2105

## Synthesis of MOM ether **9**

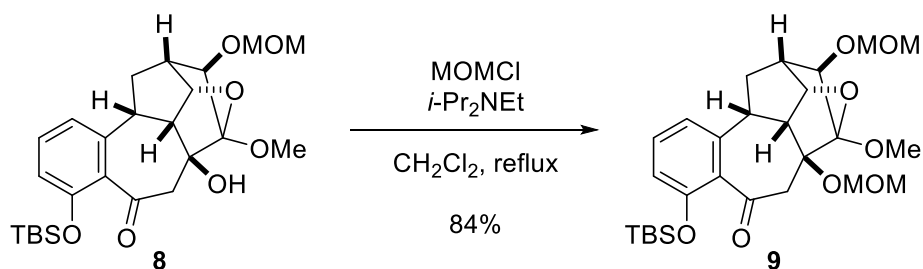

To a stirred solution of **8** (130 mg, 0.273 mmol) in  $\text{CH}_2\text{Cl}_2$  (2.4 mL) were added MOMCl (83.0  $\mu\text{L}$ , 1.09 mmol) and *i*-Pr<sub>2</sub>NEt (190  $\mu\text{L}$ , 1.09 mmol) at rt. After stirring for 14 h at reflux, the resulting mixture was quenched with  $\text{H}_2\text{O}$  at rt and extracted three times with  $\text{CH}_2\text{Cl}_2$ . The combined organic layer was dried over  $\text{Na}_2\text{SO}_4$ , filtrated, and concentrated. The residue was purified by flash column chromatography on silica gel (30-40% ethyl acetate/hexane) to give **9** (120 mg, 0.230 mmol, 84.4 %) as a yellow foam.

**<sup>1</sup>H NMR** ( $\text{CDCl}_3$ ): 7.17 (dd,  $J = 8.1, 7.5$  Hz, 1H), 6.75 (dd,  $J = 8.1, 0.9$  Hz, 1H), 6.72 (d,  $J = 7.5$  Hz, 1H), 5.17 (d,  $J = 7.3$  Hz, 1H), 4.85 (dd,  $J = 5.5, 5.5$  Hz, 1H), 4.80 (d,  $J = 7.3$  Hz, 1H), 4.77 (d,  $J = 6.8$  Hz, 1H), 4.67 (d,  $J = 6.8$  Hz, 1H), 3.77 (s, 3H), 3.74 (s, 1H), 3.49 (ddd,  $J = 10.1, 5.5, 5.5$  Hz, 1H), 3.37 (s, 3H), 3.35 (s, 3H), 3.22 (dd,  $J = 5.5, 5.5$  Hz, 1H), 3.12 (d,  $J = 12.1$  Hz, 1H), 3.01 (d,  $J = 12.1$  Hz, 1H), 2.58-2.46 (m, 2H), 1.81 (dd,  $J = 13.7, 10.1$  Hz, 1H), 0.98 (s, 9H), 0.22 (s, 3H), 0.18 (s, 3H)

**<sup>13</sup>C NMR** ( $\text{CDCl}_3$ ): 197.0 (C), 153.3 (C), 141.1 (C), 131.1 (CH), 131.1 (C), 123.1 (CH), 119.3 (CH), 112.3 (C), 95.6 (CH<sub>2</sub>), 92.9 (CH<sub>2</sub>), 82.6 (C), 82.5 (CH), 80.1 (CH), 55.8 (CH<sub>3</sub>), 55.6 (CH<sub>3</sub>), 55.2 (CH<sub>3</sub>), 52.4 (CH), 48.2 (CH), 47.9 (CH<sub>2</sub>), 45.7 (CH), 36.9 (CH<sub>2</sub>), 25.7 (CH<sub>3</sub>), 18.2 (C), -4.3 (CH<sub>3</sub>), -4.4 (CH<sub>3</sub>)

**IR** (film,  $\text{cm}^{-1}$ ): 2951, 1696, 1584, 1464, 1286, 1152, 1027, 891, 837, 785

**HRMS** (ESI-QTOF) calcd for  $\text{C}_{27}\text{H}_{40}\text{NaO}_8\text{Si}^+$  [ $\text{M} + \text{Na}^+$ ] 543.2385, found 543.2373

## Synthesis of alcohol **10**

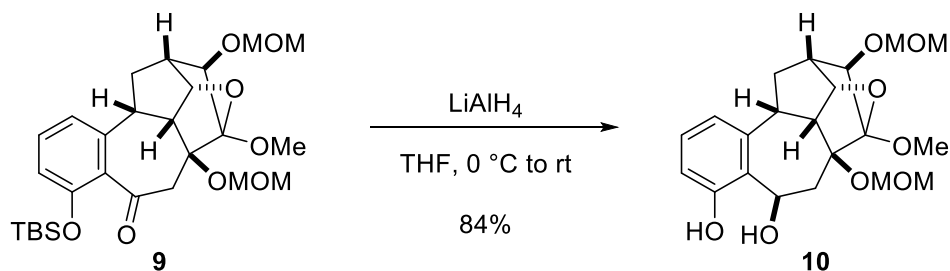

To a stirred solution of **9** (694 mg, 1.33 mmol) in THF (13.3 mL) was added  $\text{LiAlH}_4$  (101 mg, 2.67 mmol) at 0 °C. After stirring for 90 min at rt, the resulting mixture was quenched with aqueous Rochel salt at the same temperature and extracted three times with ethyl acetate. The combined organic layer was dried over  $\text{Na}_2\text{SO}_4$ , filtrated, and concentrated. The residue was purified by flash column chromatography on silica gel (40-70% ethyl acetate/hexane) to give **10** (456 mg, 1.12 mmol, 83.9 %) as a pale yellow foam.

**$^1\text{H}$  NMR** ( $\text{CDCl}_3$ ): 7.46 (s, 1H), 7.09 (dd,  $J = 8.1, 7.6$  Hz, 1H), 6.83 (dd,  $J = 8.1, 1.1$  Hz, 1H), 6.60 (d,  $J = 7.6$  Hz, 1H), 5.19 (m, 1H), 5.17 (d,  $J = 6.7$  Hz, 1H), 5.09 (d,  $J = 8.2$  Hz, 1H), 4.96 (d,  $J = 6.7$  Hz, 1H), 4.80 (dd,  $J = 5.5, 5.5$  Hz, 1H), 4.74 (d,  $J = 6.9$  Hz, 1H), 4.68 (d,  $J = 6.9$  Hz, 1H), 3.85 (s, 1H), 3.79 (s, 3H), 3.40 (s, 3H), 3.38 (s, 3H), 3.34 (m, 1H), 3.16 (dd,  $J = 5.5, 5.0$  Hz, 1H), 2.66 (dd,  $J = 15.6, 5.0$  Hz, 1H), 2.56-2.46 (m, 2H), 2.29 (dd,  $J = 15.6, 2.7$  Hz, 1H), 1.80 (dd,  $J = 12.8, 10.0$  Hz, 1H)

**$^{13}\text{C}$  NMR** ( $\text{CDCl}_3$ ): 157.7 (C), 137.6 (C), 128.7 (CH), 126.9 (C), 123.7 (CH), 115.3 (CH), 111.6 (C), 94.9 ( $\text{CH}_2$ ), 92.9 ( $\text{CH}_2$ ), 84.5 (C), 82.8 (CH), 79.3 (CH), 68.1 (CH), 56.5 ( $\text{CH}_3$ ), 55.7 ( $\text{CH}_3$ ), 55.0 ( $\text{CH}_3$ ), 53.9 (CH), 47.4 (CH), 45.1 (CH), 35.7 ( $\text{CH}_2$ ), 33.2 ( $\text{CH}_2$ )

**IR** (film,  $\text{cm}^{-1}$ ): 3415, 2950, 2361, 1585, 1459, 1281, 1151, 1018, 921, 753

**HRMS** (ESI-QTOF) calcd for  $\text{C}_{21}\text{H}_{28}\text{NaO}_8^+$  [ $\text{M} + \text{Na}^+$ ] 431.1676, found 431.1663

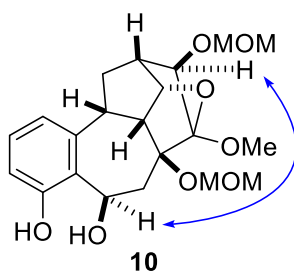

Selected NOESY correlation of **10**

## Synthesis of hydroquinone **13**

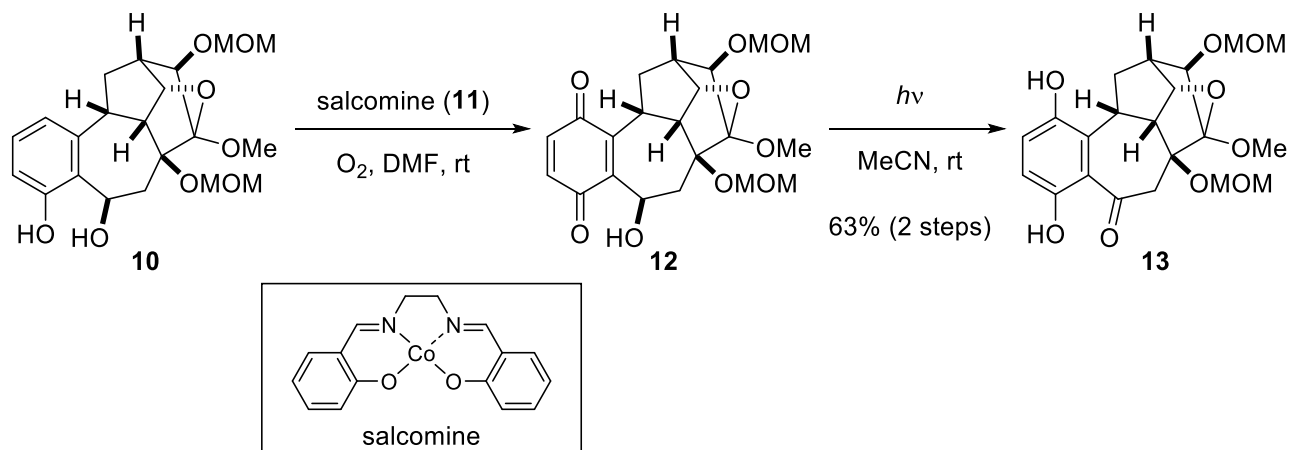

To a stirred solution of **10** (1.14 g, 2.79 mmol) in DMF (14 mL) was added salcomine **11** (227 mg, 0.698 mmol) and then oxygen gas was purged at rt. After stirring for 13 h at rt, the resulting mixture was quenched with H<sub>2</sub>O at the same temperature and extracted three times with ethyl acetate. The combined organic layer was dried over Na<sub>2</sub>SO<sub>4</sub>, filtrated, and concentrated to give the crude product of **12**. This was used for the next reaction without further purification.

A solution of the residue in MeCN (280 mL) was irradiated with a Hg lamp at rt. After stirring for 3 h, the solution was concentrated. The residue was purified by flash column chromatography on silica gel (40-70% ethyl acetate/hexane) to give **13** (744 mg, 1.76 mmol, 63.1 %) as a yellow foam.

**<sup>1</sup>H NMR** (CDCl<sub>3</sub>): 12.01 (s, 1H), 6.88 (d, *J* = 8.7 Hz, 1H), 6.77 (d, *J* = 8.7 Hz, 1H), 5.28 (d, *J* = 6.9 Hz, 1H), 5.22 (br, 1H), 4.82 (dd, *J* = 6.4, 5.5 Hz, 1H), 4.77 (d, *J* = 6.9 Hz, 1H), 4.77 (d, *J* = 6.9 Hz, 1H), 3.82 (ddd, *J* = 11.6, 10.8, 4.6 Hz, 1H), 3.78 (s, 3H), 3.70 (s, 1H), 3.41 (s, 3H), 3.31 (s, 3H), 3.22 (dd, *J* = 5.5, 4.6 Hz, 1H), 3.03 (d, *J* = 12.2 Hz, 1H), 2.95 (d, *J* = 12.2 Hz, 1H), 2.81 (ddd, *J* = 14.1, 11.6, 9.1 Hz, 1H), 2.54 (dd, *J* = 6.4, 9.1 Hz, 1H), 1.71 (dd, *J* = 14.1, 10.8 Hz, 1H)

**<sup>13</sup>C NMR** (CDCl<sub>3</sub>): 202.7 (C), 156.3 (C), 146.6 (C), 127.9 (C), 123.3 (CH), 120.5 (C), 117.2 (CH), 111.7 (C), 95.0 (CH<sub>2</sub>), 92.7 (CH<sub>2</sub>), 83.0 (C), 82.8 (CH), 79.3 (CH), 55.7 (CH<sub>3</sub>), 55.7 (CH<sub>3</sub>), 55.2 (CH<sub>3</sub>), 52.2 (CH), 47.6 (CH<sub>2</sub>), 47.6 (CH), 38.6 (CH), 33.4 (CH<sub>2</sub>)

**IR** (film, cm<sup>-1</sup>): 3363, 2953, 1637, 1462, 1291, 1205, 1150, 1025, 919, 756

**HRMS** (ESI-QTOF) calcd for C<sub>21</sub>H<sub>26</sub>NaO<sub>9</sub><sup>+</sup> [*M* + Na<sup>+</sup>] 445.1469, found 445.1451

## Synthesis of benzyl ether **14**

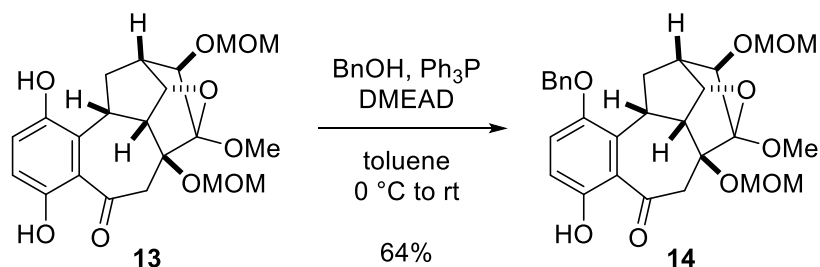

To a stirred solution of **13** (440 mg, 1.04 mmol) in toluene (10.5 mL) were added BnOH (130  $\mu\text{L}$ , 1.25 mmol),  $\text{PPh}_3$  (328 mg, 1.25 mmol) and DMEAD (293 mg, 1.25 mmol) at 0  $^\circ\text{C}$ . After stirring for 1.5 h at rt, the resulting mixture was quenched with  $\text{H}_2\text{O}$  at the same temperature and extracted three times with ethyl acetate. The combined organic layer was dried over  $\text{Na}_2\text{SO}_4$ , filtrated, and concentrated. The residue was purified by flash column chromatography on silica gel (20-50% ethyl acetate/hexane) to give **14** (340 mg, 0.663 mmol, 63.7 %) as a yellow foam.

**$^1\text{H}$  NMR** ( $\text{CDCl}_3$ ): 12.03 (s, 1H), 7.43-7.34 (m, 5H), 7.10 (d,  $J = 9.2$  Hz, 1H), 6.85 (d,  $J = 9.2$  Hz, 1H), 5.28 (d,  $J = 7.3$  Hz, 1H), 5.08 (d,  $J = 11.7$  Hz, 1H), 4.99 (d,  $J = 11.7$  Hz, 1H), 4.80 (dd,  $J = 6.7, 5.5$  Hz, 1H), 4.77 (d,  $J = 6.9$  Hz, 1H), 4.75 (d,  $J = 7.3$  Hz, 1H), 4.67 (d,  $J = 6.9$  Hz, 1H), 3.93 (ddd,  $J = 11.6, 10.5, 5.6$  Hz, 1H), 3.77 (s, 3H), 3.72 (s, 1H), 3.38 (s, 3H), 3.29 (s, 3H), 3.22 (dd,  $J = 5.6, 5.5$  Hz, 1H), 3.13 (d,  $J = 11.9$  Hz, 1H), 2.99 (d,  $J = 11.9$  Hz, 1H), 2.79 (ddd,  $J = 14.3, 11.6, 8.8$  Hz, 1H), 2.52 (dd,  $J = 8.8, 6.7$  Hz, 1H), 1.79 (dd,  $J = 14.3, 10.5$  Hz, 1H)

**$^{13}\text{C}$  NMR** ( $\text{CDCl}_3$ ): 203.0 (C), 156.3 (C), 149.6 (C), 136.8 (C), 130.9 (CH), 128.7 (CH), 128.1 (CH), 127.3 (CH), 120.8 (C), 120.7 (CH), 116.9 (CH), 111.8 (C), 95.2 ( $\text{CH}_2$ ), 92.8 ( $\text{CH}_2$ ), 82.8 (C), 82.7 (CH), 79.2 (CH), 71.4 ( $\text{CH}_2$ ), 55.6 ( $\text{CH}_3$ ), 55.6 ( $\text{CH}_3$ ), 55.3 ( $\text{CH}_3$ ), 52.3 (CH), 47.7 (CH), 47.7 ( $\text{CH}_2$ ), 38.7 (CH), 33.6 ( $\text{CH}_2$ )

**IR** (film,  $\text{cm}^{-1}$ ): 2952, 1640, 1457, 1380, 1290, 1214, 1150, 1027, 916, 750

**HRMS** (ESI-QTOF) calcd for  $\text{C}_{28}\text{H}_{32}\text{NaO}_9^+$  [ $\text{M} + \text{Na}^+$ ] 535.1939, found 535.1935

## Synthesis of alcohol **15**

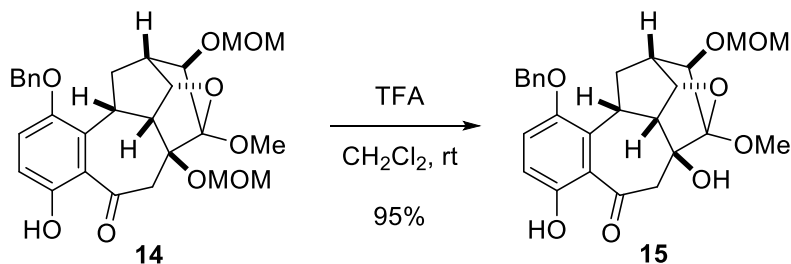

To a stirred solution of **14** (307 mg, 0.599 mmol) in  $\text{CH}_2\text{Cl}_2$  (5.7 mL) was added TFA (300  $\mu\text{L}$ ) at rt. After stirring for 30 min, the resulting mixture was quenched with aqueous  $\text{NaHCO}_3$  at the same temperature and extracted three times with  $\text{CH}_2\text{Cl}_2$ . The combined organic layer was dried over  $\text{Na}_2\text{SO}_4$ , filtrated, and concentrated. The residue was purified by flash column chromatography on silica gel (30-60% ethyl acetate/hexane) to give **15** (266 mg, 0.568 mmol, 94.8 %) as a yellow foam.

**$^1\text{H}$  NMR** ( $\text{CDCl}_3$ ): 11.79 (s, 1H), 7.43-7.34 (m, 5H), 7.10 (d,  $J = 9.1$  Hz, 1H), 6.85 (d,  $J = 9.1$  Hz, 1H), 5.07 (d,  $J = 11.7$  Hz, 1H), 4.99 (d,  $J = 11.7$  Hz, 1H), 4.83 (dd,  $J = 6.9, 5.0$  Hz, 1H), 4.72 (d,  $J = 6.8$  Hz, 1H), 4.70 (d,  $J = 6.8$  Hz, 1H), 3.85 (s, 3H), 3.82 (s, 1H), 3.81 (m, 1H), 3.40 (s, 3H), 3.21 (d,  $J = 11.7$  Hz, 1H), 2.81 (ddd,  $J = 14.5, 11.4, 8.9$  Hz, 1H), 2.76 (s, 1H), 2.71 (d,  $J = 11.7$  Hz, 1H), 2.62 (dd,  $J = 5.0, 5.0$  Hz, 1H), 2.56 (dd,  $J = 8.9, 6.9$  Hz, 1H), 1.79 (dd,  $J = 14.5, 10.3$  Hz, 1H)

**$^{13}\text{C}$  NMR** ( $\text{CDCl}_3$ ): 203.0 (C), 155.9 (C), 149.6 (C), 136.8 (C), 130.7 (C), 128.7 (C), 128.2 (CH), 127.3 (CH), 121.0 (C), 120.7 (CH), 117.0 (CH), 109.9 (C), 94.7 ( $\text{CH}_2$ ), 82.9 (CH), 79.5 (CH), 78.3 (C), 71.5 ( $\text{CH}_2$ ), 56.0 ( $\text{CH}_3$ ), 55.7 ( $\text{CH}_3$ ), 55.5 (CH), 49.4 ( $\text{CH}_2$ ), 47.7 (CH), 38.1 (CH), 33.3 ( $\text{CH}_2$ )

**IR** (film,  $\text{cm}^{-1}$ ): 3489, 2952, 1640, 1457, 1288, 1217, 1145, 1029, 749, 547

**HRMS** (ESI-QTOF) calcd for  $\text{C}_{26}\text{H}_{28}\text{NaO}_8^+$  [ $\text{M} + \text{Na}^+$ ] 491.1676, found 491.1670

## Synthesis of triflate **16**

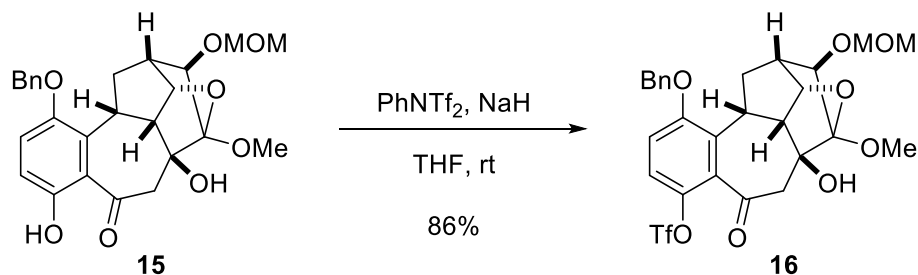

To a stirred solution of **15** (243 mg, 0.517 mmol) in THF (5.2 mL) were added PhNTf<sub>2</sub> (278 mg 0.778 mmol) and NaH (55%, dispersion in paraffin liquid, 27.2 mg, 0.622 mmol) at rt. After stirring for 2 h at rt, the resulting mixture was quenched with 1N HCl at the same temperature and extracted three times with ethyl acetate. The combined organic layer was dried over Na<sub>2</sub>SO<sub>4</sub>, filtrated, and concentrated. The residue was purified by flash column chromatography on silica gel (30-60% ethyl acetate/hexane) to give **16** (267 mg, 0.445 mmol, 86.0 %) as a pale yellow foam.

**<sup>1</sup>H NMR** (CDCl<sub>3</sub>): 7.46-7.36 (m, 5H), 7.13 (d, *J* = 9.2 Hz, 1H), 7.00 (d, *J* = 9.2 Hz, 1H), 5.13 (d, *J* = 11.9 Hz, 1H), 5.08 (d, *J* = 11.9 Hz, 1H), 4.87 (dd, *J* = 6.8, 5.0 Hz, 1H), 4.72 (d, *J* = 6.9 Hz, 1H), 4.69 (d, *J* = 6.9 Hz, 1H), 3.87 (m, 1H), 3.84 (s, 3H), 3.81 (s, 1H), 3.39 (s, 3H), 3.21 (d, *J* = 11.2 Hz, 1H), 2.83 (ddd, *J* = 14.2, 11.3, 9.2 Hz, 1H), 2.74-2.69 (m, 2H), 2.72 (d, 11.2 Hz, 1H), 2.54 (dd, *J* = 9.2, 6.8 Hz, 1H), 1.71 (dd, *J* = 14.2, 10.7 Hz, 1H)

**<sup>13</sup>C NMR** (CDCl<sub>3</sub>): 195.1 (C), 155.9 (C), 139.2 (C), 135.6 (C), 132.9 (C), 131.6 (C), 128.9 (CH), 128.6 (CH), 127.4 (CH), 121.7 (CH), 118.6 (CF<sub>3</sub>, q, *J* = 318.5 Hz), 114.1 (CH), 110.1 (C), 94.8 (CH<sub>2</sub>), 82.7 (CH), 79.8 (CH), 78.2 (C), 71.1 (CH<sub>2</sub>), 56.0 (CH<sub>3</sub>), 55.7 (CH<sub>3</sub>), 55.3 (CH), 48.9 (CH<sub>2</sub>), 47.7 (CH), 38.0 (CH), 33.8 (CH<sub>2</sub>)

**IR** (film, cm<sup>-1</sup>): 2953, 1703, 1597, 1423, 1213, 1142, 1030, 873, 753, 591

**HRMS** (ESI-QTOF) calcd for C<sub>27</sub>H<sub>27</sub>F<sub>3</sub>NaO<sub>10</sub><sup>+</sup> [*M* + Na<sup>+</sup>] 623.1169, found 623.1144

### Synthesis of furan 17

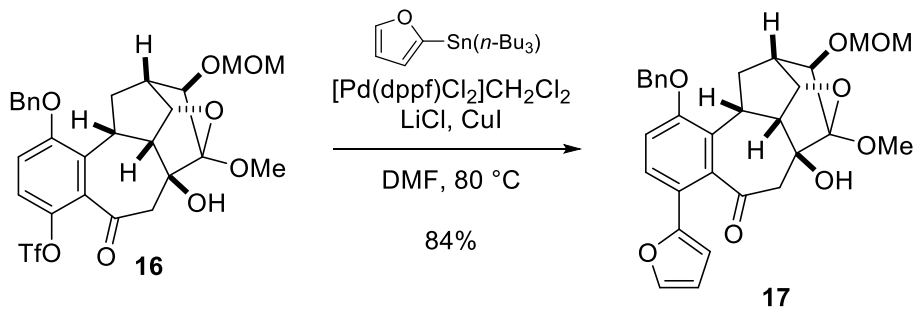

To a stirred solution of **16** (245 mg, 0.408 mmol) in DMF (2.1 mL) were added tributyl(2-furyl)tin (190  $\mu$ L, 0.612 mmol), LiCl (52.0 mg, 1.22 mmol), CuI (117 mg, 0.612 mmol) and [Pd(dppf)Cl<sub>2</sub>](CH<sub>2</sub>Cl<sub>2</sub>) (66.6 mg, 0.0816 mmol) at rt. After stirring for 1 h at 80  $^{\circ}$ C, the resulting mixture was quenched with H<sub>2</sub>O at rt and extracted three times with ethyl acetate. The combined organic layer was dried over Na<sub>2</sub>SO<sub>4</sub>, filtered, and concentrated. The residue was purified by flash column chromatography on silica gel and K<sub>2</sub>CO<sub>3</sub> (40-70% ethyl acetate/hexane) to give **17** (179 mg, 0.344 mmol, 84.4 %) as an orange foam.

**<sup>1</sup>H NMR** (CDCl<sub>3</sub>): 7.44-7.33 (m, 7H), 6.98 (d, *J* = 8.7 Hz, 1H), 6.41-6.38 (m, 2H), 5.13 (d, *J* = 11.9 Hz, 1H), 5.09 (d, *J* = 11.9 Hz, 1H), 4.86 (dd, *J* = 6.4, 5.3 Hz, 1H), 4.74 (d, *J* = 6.6 Hz, 1H), 4.69 (d, *J* = 6.6 Hz, 1H), 3.94 (ddd, *J* = 11.3, 10.5, 5.7 Hz, 1H), 3.86 (s, 1H), 3.84 (s, 3H), 3.40 (d, *J* = 11.2 Hz, 1H), 3.38 (s, 3H), 2.87 (s, 1H), 2.82 (d, *J* = 11.2 Hz, 1H), 2.77 (ddd, *J* = 14.3, 11.3, 9.0 Hz, 1H), 2.65 (dd, *J* = 5.7, 5.3 Hz, 1H), 2.52 (dd, *J* = 9.0, 6.4 Hz, 1H), 1.69 (dd, *J* = 14.3, 10.5 Hz, 1H)

**<sup>13</sup>C NMR** (CDCl<sub>3</sub>): 201.2 (C), 156.0 (C), 153.1 (C), 141.9 (CH), 139.0 (C), 126.3 (C), 129.2 (CH), 128.8 (C), 128.8 (CH), 128.2 (CH), 127.3 (CH), 122.2 (C), 113.2 (CH), 111.2 (CH), 110.5 (C), 107.1 (CH), 95.0 (CH<sub>2</sub>), 82.7 (CH), 80.0 (CH), 78.1 (C), 70.7 (CH<sub>2</sub>), 56.2 (CH), 56.0 (CH<sub>3</sub>), 55.6 (CH<sub>3</sub>), 48.2 (CH<sub>2</sub>), 48.0 (CH), 37.2 (CH), 34.4 (CH<sub>2</sub>)

IR (film, cm<sup>-1</sup>): 2952, 1699, 1573, 1450, 1284, 1150, 1030, 914, 815, 749

**HRMS** (ESI-QTOF) calcd for  $C_{30}H_{30}NaO_8^+$  [ $M + Na^+$ ] 541.1833, found 541.1823



## Synthesis of methyl ester 19

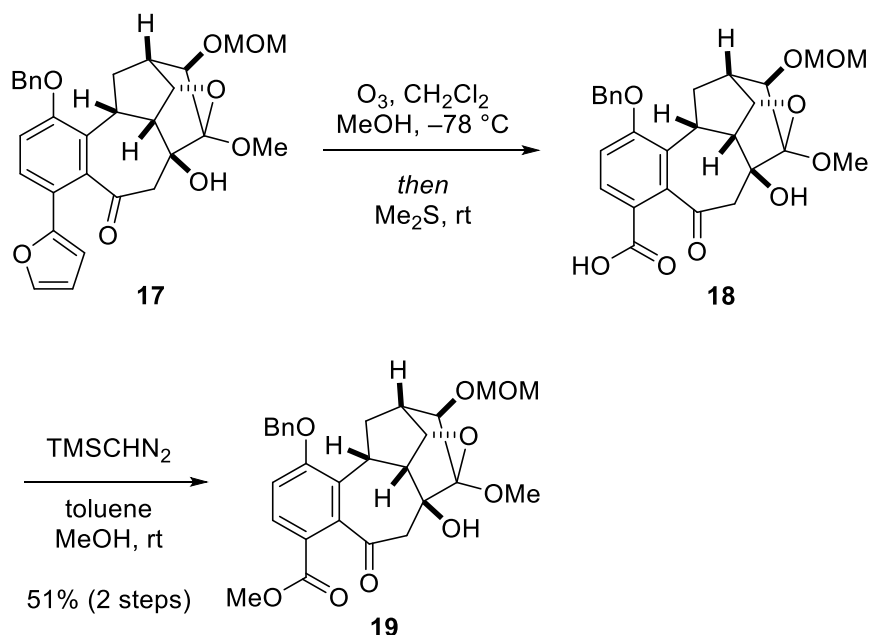

A stirred solution of **17** (28.8 mg, 0.0555 mmol) in  $\text{CH}_2\text{Cl}_2$  (420  $\mu\text{L}$ ) and  $\text{MeOH}$  (140  $\mu\text{L}$ ) was bubbled with ozone gas at  $-78^\circ\text{C}$ . After the starting material was consumed completely, argon gas was then passed through the mixture until the disappearance of the blue color. Then the reaction mixture was added to  $\text{Me}_2\text{S}$  (20.5  $\mu\text{L}$ , 0.278 mmol) at  $-78^\circ\text{C}$ . After stirring for 1 h at rt, the resulting mixture was concentrated to give the crude product of **18**. This was used for the next reaction without further purification.

To a stirred solution of the residue in toluene (330  $\mu\text{L}$ ) and  $\text{MeOH}$  (220  $\mu\text{L}$ ) was added  $\text{TMSCHN}_2$  (0.6 M in hexane, 185  $\mu\text{L}$ , 0.111 mmol) at rt. After stirring for 40 min at rt, the resulting mixture was quenched with  $\text{AcOH}$  at the same temperature and concentrated. The residue was purified by pTLC (60% ethyl acetate/hexane) to give **19** (14.4 mg, 0.0282 mmol, 50.8%) as a yellow foam.

**$^1\text{H}$  NMR** ( $\text{CDCl}_3$ ): 7.49 (d,  $J = 8.3$  Hz, 1H), 7.44–7.36 (m, 5H), 6.96 (d,  $J = 8.3$  Hz, 1H), 5.14 (d,  $J = 11.9$  Hz, 1H), 5.09 (d,  $J = 11.9$  Hz, 1H), 4.86 (dd,  $J = 6.2, 5.5$  Hz, 1H), 4.73 (d,  $J = 6.9$  Hz, 1H), 4.69 (d,  $J = 6.9$  Hz, 1H), 3.90 (m, 1H), 3.87 (s, 1H), 3.85 (s, 3H), 3.80 (s, 3H), 3.39 (s, 3H), 3.37 (d,  $J = 11.4$  Hz, 1H), 2.81 (d,  $J = 11.4$  Hz, 1H), 2.81 (s, 1H), 2.74 (ddd,  $J = 14.1, 11.6, 9.0$  Hz, 1H), 2.64 (dd,  $J = 5.5, 5.0$  Hz, 1H), 2.53 (dd,  $J = 9.0, 6.2$  Hz, 1H), 1.69 (dd,  $J = 14.1, 10.5$  Hz, 1H)

**$^{13}\text{C}$  NMR** ( $\text{CDCl}_3$ ): 199.6 (C), 160.1 (C), 158.0 (C), 140.7 (C), 135.8 (C), 129.2 (C), 128.9 (CH), 128.8 (CH), 128.4 (CH), 127.4 (CH), 124.9 (C), 112.6 (CH), 110.4 (C), 94.9 ( $\text{CH}_2$ ), 82.7 (CH), 79.9 (CH), 77.9 (C), 70.8 ( $\text{CH}_2$ ), 56.0 ( $\text{CH}_3$ ), 56.0 (CH), 55.7 ( $\text{CH}_3$ ), 52.5 ( $\text{CH}_3$ ), 48.0 (CH), 47.8 ( $\text{CH}_2$ ), 37.0 (CH), 34.1 ( $\text{CH}_2$ )

**IR** (film,  $\text{cm}^{-1}$ ): 2951, 2361, 1724, 1579, 1457, 1236, 1146, 1031, 914, 751

**HRMS** (ESI-QTOF) calcd for  $\text{C}_{28}\text{H}_{30}\text{NaO}_9^+$  [ $\text{M} + \text{Na}^+$ ] 533.1782, found 533.1771

### References for Supporting Information

1. Cheng, B.; Zhang, S.; Zhu, L.; Zhang, J.; Li, Q.; Shan, A.; He, L. *Synthesis* **2009**, *15*, 2501.
2. Phan, J.; Ruser, S.; Zeitler, K.; Rehbein, J. *Eur. J. Org. Chem.* **2019**, 557.
3. Kagawa, H.; Shigemitsu, A.; Ohta, S.; Harigaya, Y. *Chem. Pharm. Bull.* **2005**, *53*, 547.
4. Tamura, Y.; Yakura, T.; Haruta, J.; Kita, Y. *J. Org. Chem.* **1987**, *17*, 3927.
5. Jarrige, L.; Carboni, A.; Dagousset, G.; Levitre, G.; Magnier, E.; Masson, G. *Org. Lett.* **2016**, *18*, 2906.

**Procedure for calculations.** The geometries of the stationary points and transition states were optimized using  $\omega$ B97X-D and the 6-31G(d) basis set with Spartan '16. The vibrational frequencies were calculated at the same level of theory. Intrinsic reaction coordinate (IRC) calculations from the transition state were performed at the same level of theory.

| Structure                   | Gibbs free energy / au (298.15 K) | Number of imaginary frequency |
|-----------------------------|-----------------------------------|-------------------------------|
| <b>TS<sub>endo</sub></b>    | -844.756214                       | 1                             |
| <b>TS<sub>exo</sub></b>     | -844.749535                       | 1                             |
| <b>TS<sub>ri-endo</sub></b> | -844.744644                       | 1                             |
| <b>TS<sub>ri-exo</sub></b>  | -844.737279                       | 1                             |

**Figure S1.** Relative Gibbs free energies of transition states at 298.15 K (kcal/mol). *ri* = regioisomeric.

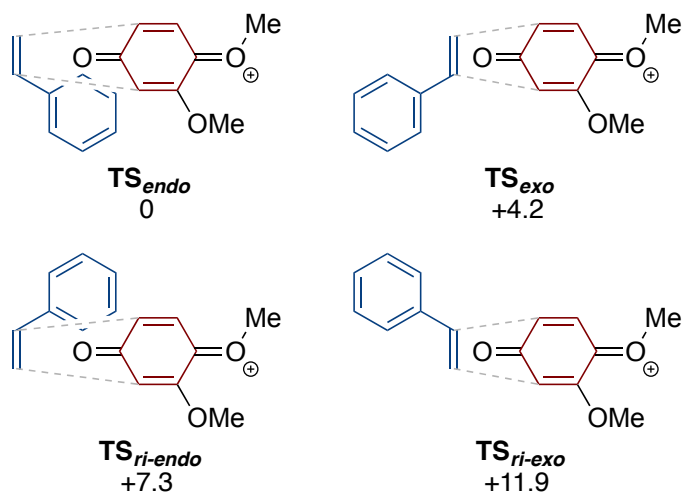

Cartesian coordinates

| <b>TS<sub>endo</sub></b> |           |           |           | <b>TS<sub>exo</sub></b> |           |           |           |
|--------------------------|-----------|-----------|-----------|-------------------------|-----------|-----------|-----------|
| H                        | 0.107939  | 2.317740  | -3.115774 | H                       | -1.412883 | 1.480500  | -2.466513 |
| C                        | -0.466300 | 1.877884  | -2.306558 | C                       | -1.752291 | 1.164973  | -1.484621 |
| H                        | -1.459687 | 1.522751  | -2.561811 | H                       | -2.750619 | 0.745465  | -1.426680 |
| C                        | -0.091989 | 2.102765  | -1.009556 | C                       | -1.108117 | 1.547599  | -0.346422 |
| H                        | 0.845510  | 2.627948  | -0.837824 | C                       | 0.917076  | -0.931923 | -0.101600 |
| C                        | 2.232602  | -0.085556 | -0.838068 | H                       | 1.851634  | -0.489851 | 0.219988  |
| H                        | 3.222513  | 0.274314  | -0.586118 | C                       | -0.873275 | -1.088214 | -1.867453 |
| C                        | 0.358601  | -0.226617 | -2.523774 | H                       | -1.156525 | -0.896541 | -2.896790 |
| H                        | 0.085645  | -0.153886 | -3.572018 | C                       | -1.565351 | -2.001958 | -1.102832 |
| C                        | -0.350278 | -1.061949 | -1.675032 | H                       | -2.488816 | -2.435034 | -1.466418 |
| H                        | -1.295971 | -1.485701 | -1.988558 | C                       | -1.065821 | -2.348087 | 0.160219  |
| C                        | 0.155011  | -1.325589 | -0.399771 | C                       | 0.178182  | -1.747783 | 0.687557  |
| C                        | 1.469006  | -0.792390 | 0.029460  | C                       | 0.493993  | -0.631709 | -1.468004 |
| C                        | 1.778784  | 0.160640  | -2.207546 | O                       | 1.196337  | -0.035438 | -2.263231 |
| O                        | 2.479854  | 0.661171  | -3.062813 | O                       | -1.614257 | -3.198200 | 0.969338  |
| O                        | -0.403570 | -2.094120 | 0.487296  | O                       | 0.435724  | -2.109981 | 1.935275  |
| O                        | 1.760200  | -1.107978 | 1.282284  | C                       | -2.824303 | -3.890438 | 0.613306  |
| C                        | -1.632881 | -2.770356 | 0.190491  | H                       | -3.633914 | -3.172464 | 0.462547  |
| H                        | -2.416918 | -2.042225 | -0.029299 | H                       | -3.041541 | -4.531275 | 1.464249  |
| H                        | -1.876228 | -3.326311 | 1.092887  | H                       | -2.657671 | -4.491966 | -0.283163 |
| H                        | -1.486840 | -3.455441 | -0.648488 | C                       | 1.616996  | -1.592140 | 2.545105  |
| C                        | 3.012929  | -0.675081 | 1.805083  | H                       | 2.506159  | -1.930242 | 2.003422  |
| H                        | 3.839155  | -1.110504 | 1.233807  | H                       | 1.622309  | -1.990966 | 3.557319  |
| H                        | 3.041718  | -1.033911 | 2.832246  | H                       | 1.584825  | -0.497463 | 2.570372  |
| H                        | 3.078516  | 0.418604  | 1.786612  | C                       | 0.134065  | 2.288169  | -0.241029 |
| C                        | -0.768302 | 1.603345  | 0.160370  | C                       | 2.572749  | 3.621702  | 0.074839  |
| C                        | -1.926529 | 0.512947  | 2.465462  | C                       | 0.657533  | 2.533191  | 1.042826  |
| C                        | -2.029113 | 0.973374  | 0.101944  | C                       | 0.854637  | 2.734513  | -1.363602 |
| C                        | -0.115047 | 1.688733  | 1.408268  | C                       | 2.066408  | 3.393078  | -1.201501 |
| C                        | -0.681069 | 1.140864  | 2.544720  | C                       | 1.863803  | 3.194319  | 1.200446  |
| C                        | -2.604668 | 0.445645  | 1.250076  | H                       | 0.100542  | 2.204357  | 1.916997  |
| H                        | -2.580777 | 0.940191  | -0.832281 | H                       | 0.470672  | 2.574484  | -2.364758 |
| H                        | 0.851070  | 2.183214  | 1.465465  | H                       | 2.615279  | 3.730874  | -2.073843 |
| H                        | -0.165052 | 1.206506  | 3.496326  | H                       | 2.254337  | 3.385933  | 2.194532  |
| H                        | -3.590093 | -0.007100 | 1.202459  | H                       | 3.517672  | 4.141521  | 0.196865  |
| H                        | -2.377739 | 0.096080  | 3.360032  | H                       | -1.565514 | 1.269754  | 0.602779  |

**TS<sub>ri-endo</sub>**

|   |           |           |           |
|---|-----------|-----------|-----------|
| H | 0.423858  | 2.181414  | -2.091463 |
| C | 0.219746  | 1.959474  | -1.045879 |
| C | 1.201575  | 2.255419  | -0.115637 |
| H | 2.077494  | 2.808008  | -0.441742 |
| H | 0.942206  | 2.365284  | 0.932992  |
| C | 2.249298  | 0.425392  | 0.255980  |
| H | 3.045416  | 0.925770  | 0.798062  |
| C | 1.516503  | -0.552193 | -1.942670 |
| H | 1.595207  | -0.577440 | -3.024036 |
| C | 0.616794  | -1.301736 | -1.271044 |
| H | -0.083386 | -1.922061 | -1.817876 |
| C | 0.555954  | -1.303520 | 0.172461  |
| C | 1.389182  | -0.443101 | 0.929488  |
| C | 2.537446  | 0.216094  | -1.200446 |
| O | 3.527900  | 0.675604  | -1.722668 |
| O | -0.206555 | -2.115091 | 0.863145  |
| O | 1.212462  | -0.482356 | 2.255346  |
| C | -1.079987 | -3.042815 | 0.206619  |
| H | -1.812157 | -2.506692 | -0.402754 |
| H | -1.583966 | -3.572500 | 1.012466  |
| H | -0.504265 | -3.749277 | -0.397396 |
| C | 2.178133  | 0.151101  | 3.091123  |
| H | 3.181010  | -0.241556 | 2.893455  |
| H | 1.883945  | -0.092057 | 4.110458  |
| H | 2.166984  | 1.238610  | 2.960591  |
| C | -1.046589 | 1.354879  | -0.743392 |
| C | -3.489690 | 0.075323  | -0.250357 |
| C | -1.955857 | 1.101933  | -1.796841 |
| C | -1.392882 | 0.942912  | 0.560187  |
| C | -2.605221 | 0.303444  | 0.798795  |
| C | -3.162981 | 0.477058  | -1.552579 |
| H | -1.698152 | 1.412539  | -2.805853 |
| H | -0.733827 | 1.137825  | 1.399470  |
| H | -2.862021 | -0.001857 | 1.807546  |
| H | -3.860502 | 0.303996  | -2.365706 |
| H | -4.443072 | -0.407825 | -0.059845 |

**TS<sub>ri-exo</sub>**

|   |           |           |           |
|---|-----------|-----------|-----------|
| C | -0.880421 | 1.293665  | -0.205508 |
| H | -1.851494 | 0.803743  | -0.215189 |
| C | -0.182065 | 1.296852  | 0.999451  |
| H | 0.625931  | 2.007284  | 1.143832  |
| H | -0.710687 | 1.006987  | 1.900269  |
| C | 1.191077  | -0.378989 | 1.067797  |
| H | 2.040178  | 0.176598  | 1.450929  |
| C | 0.008299  | -1.269244 | -0.948260 |
| H | -0.189191 | -1.210262 | -2.013055 |
| C | -0.636554 | -2.148889 | -0.139441 |
| H | -1.402912 | -2.795140 | -0.552508 |
| C | -0.330069 | -2.250618 | 1.257246  |
| C | 0.579498  | -1.352507 | 1.862534  |
| C | 1.147837  | -0.498402 | -0.419281 |
| O | 1.976297  | 0.034284  | -1.127882 |
| O | -0.877921 | -3.131889 | 2.062942  |
| O | 0.705538  | -1.462621 | 3.186736  |
| C | -1.757250 | -4.144474 | 1.561924  |
| H | -2.674079 | -3.697523 | 1.166827  |
| H | -1.993877 | -4.764271 | 2.424128  |
| H | -1.256026 | -4.745163 | 0.797914  |
| C | 1.708621  | -0.695616 | 3.844827  |
| H | 2.702235  | -0.928663 | 3.447037  |
| H | 1.656455  | -0.986977 | 4.892179  |
| H | 1.507802  | 0.377871  | 3.755885  |
| C | -0.491087 | 1.954528  | -1.423549 |
| C | 0.176205  | 3.193388  | -3.839588 |
| C | 0.746916  | 2.613122  | -1.573571 |
| C | -1.383487 | 1.927886  | -2.516443 |
| C | -1.055698 | 2.546049  | -3.709120 |
| C | 1.073771  | 3.223682  | -2.774749 |
| H | 1.456152  | 2.649618  | -0.754198 |
| H | -2.341044 | 1.424386  | -2.410847 |
| H | -1.751786 | 2.528476  | -4.540903 |
| H | 2.029335  | 3.725096  | -2.882258 |
| H | 0.433503  | 3.677734  | -4.776106 |

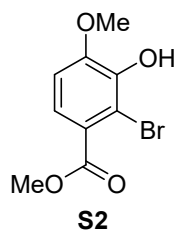 $^1\text{H-NMR}$  (400 MHz,  $\text{CDCl}_3$ )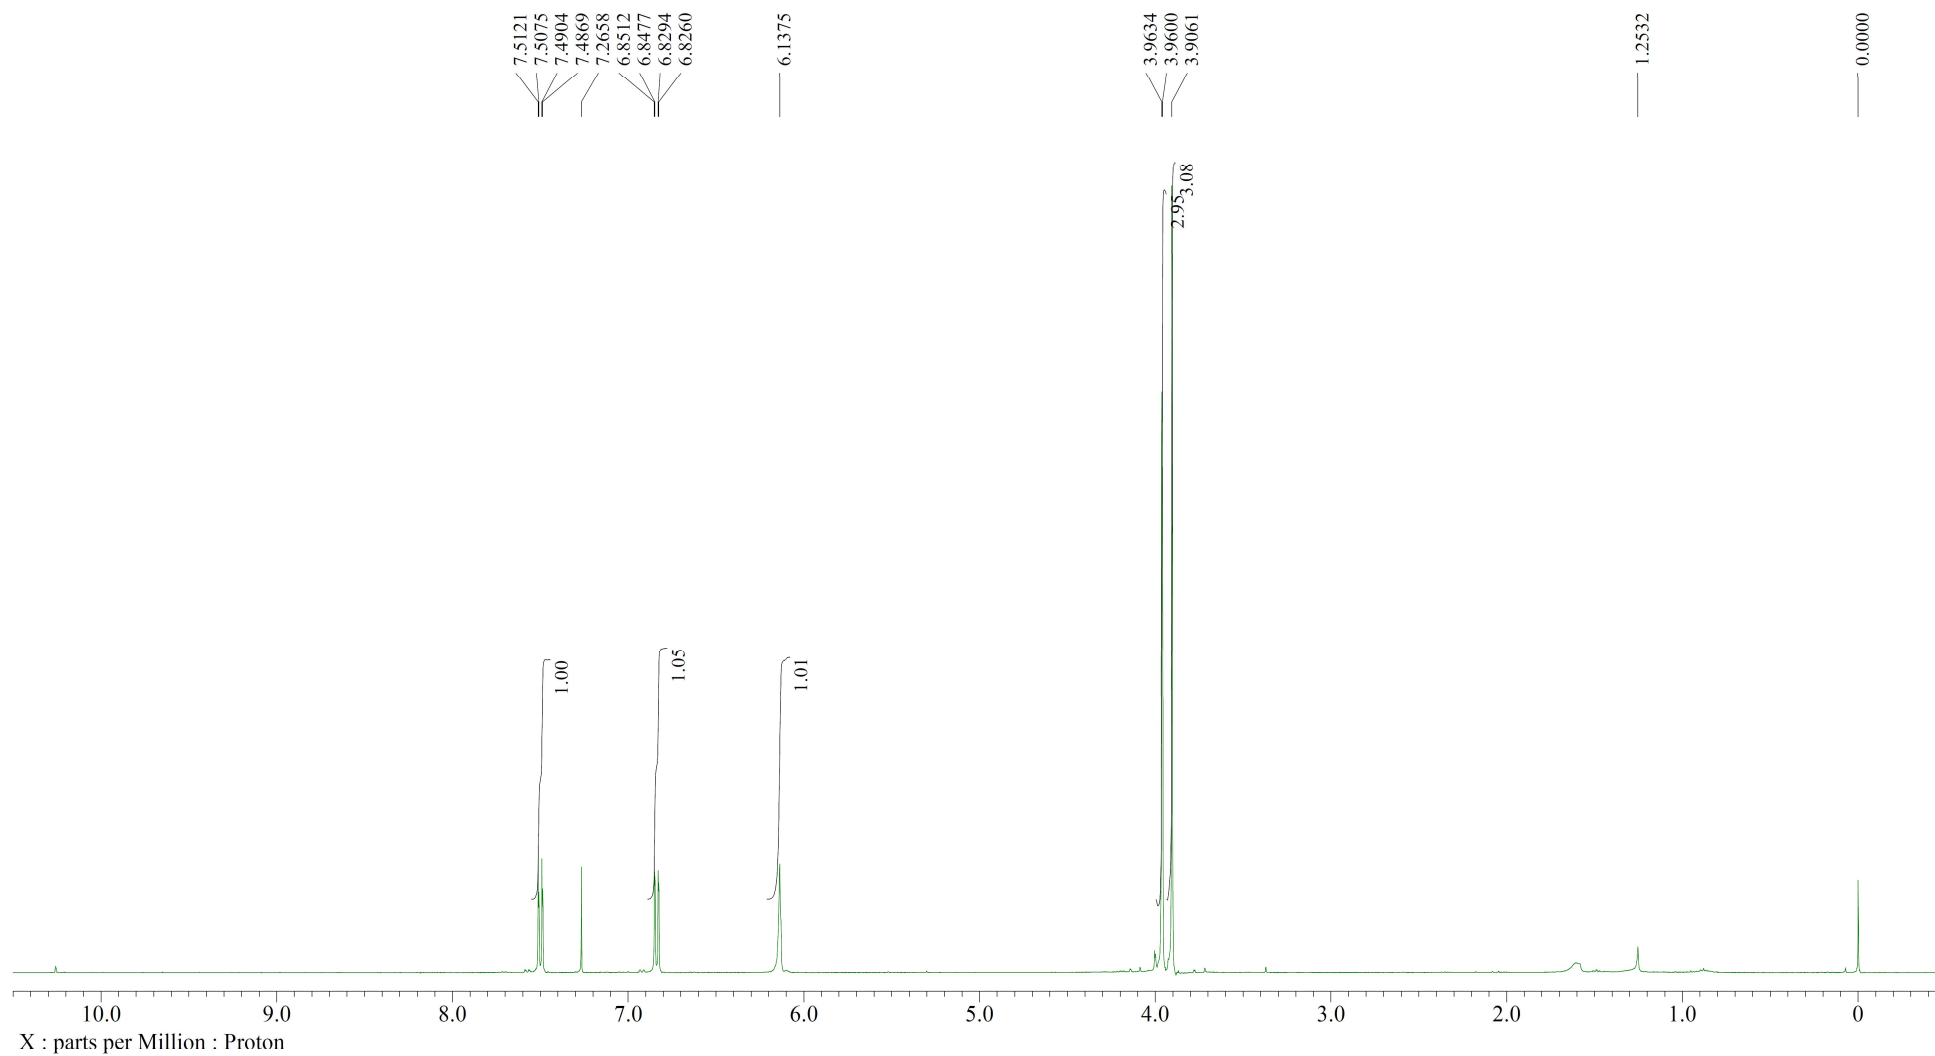

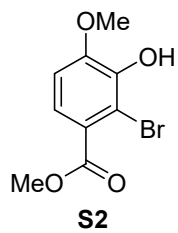

$^{13}\text{C}$ -NMR (100 MHz,  $\text{CDCl}_3$ )

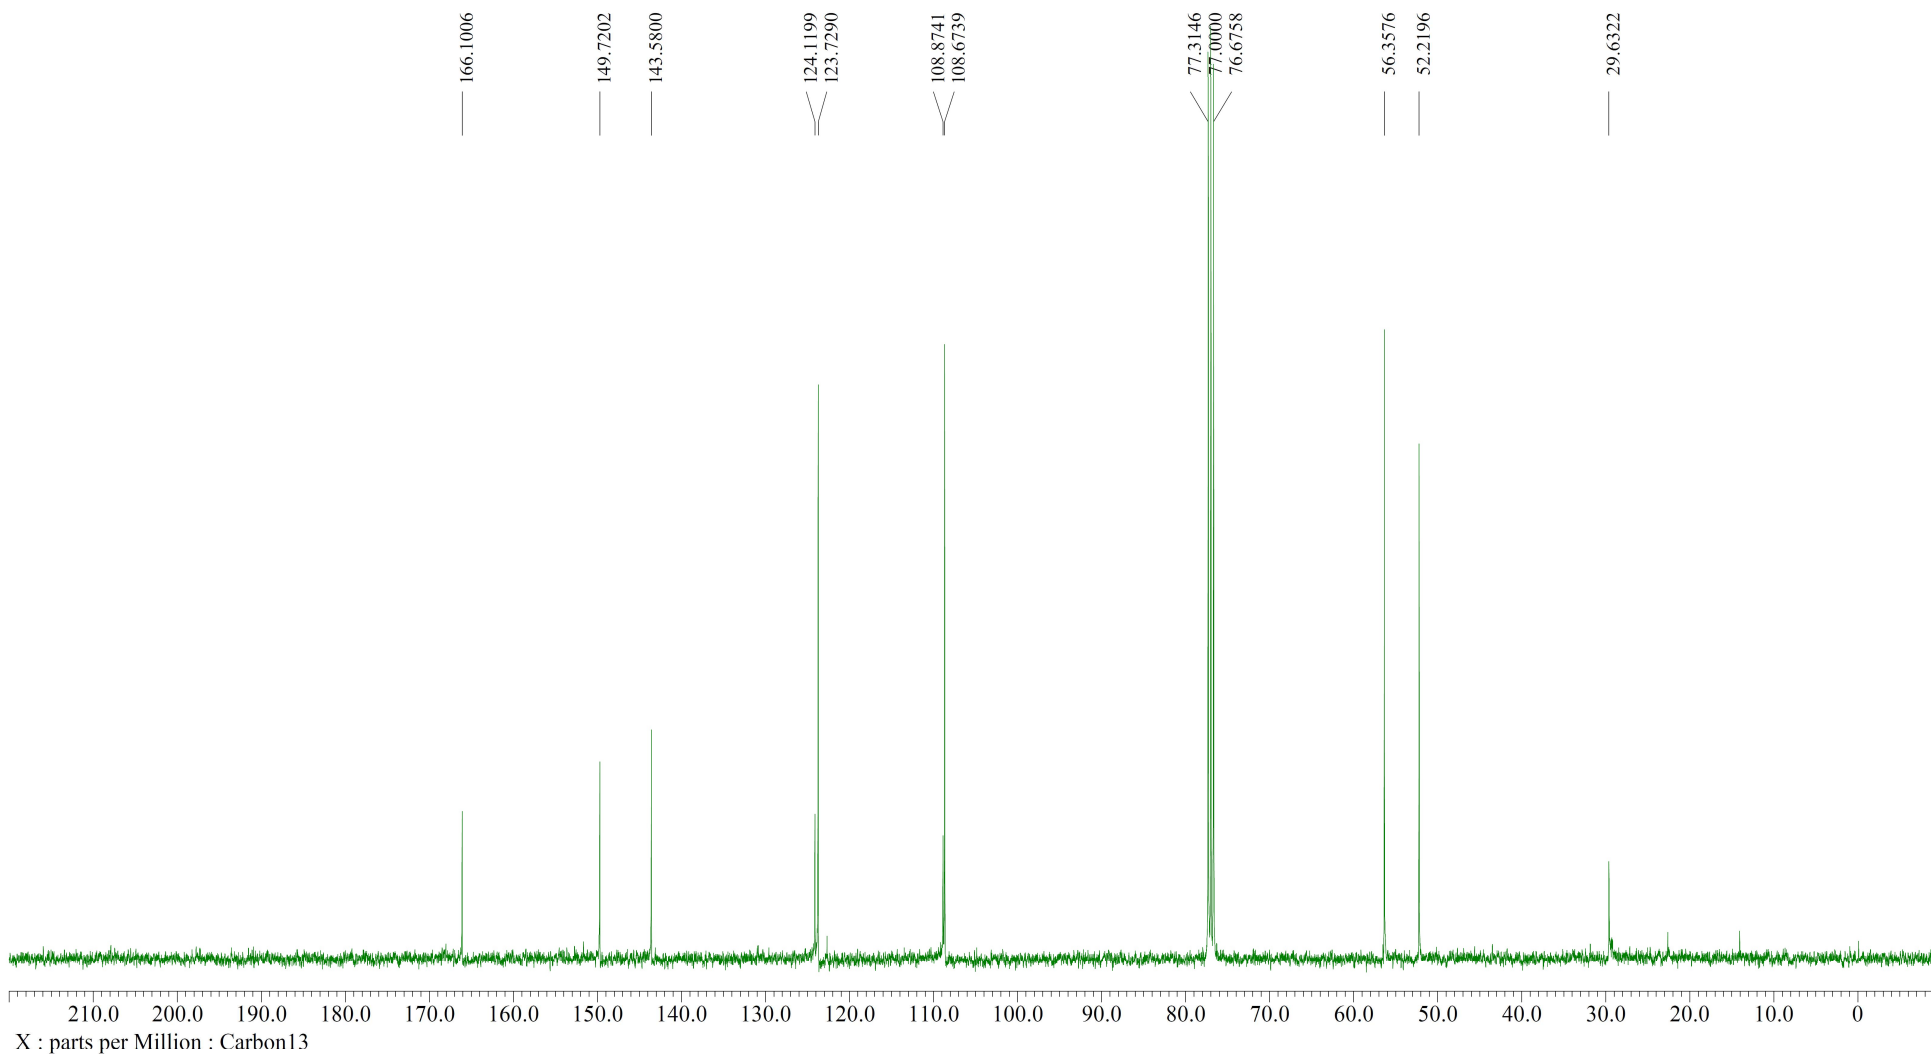

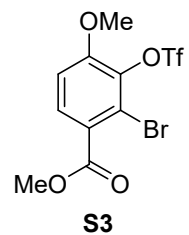

<sup>1</sup>H-NMR (400 MHz, CDCl<sub>3</sub>)

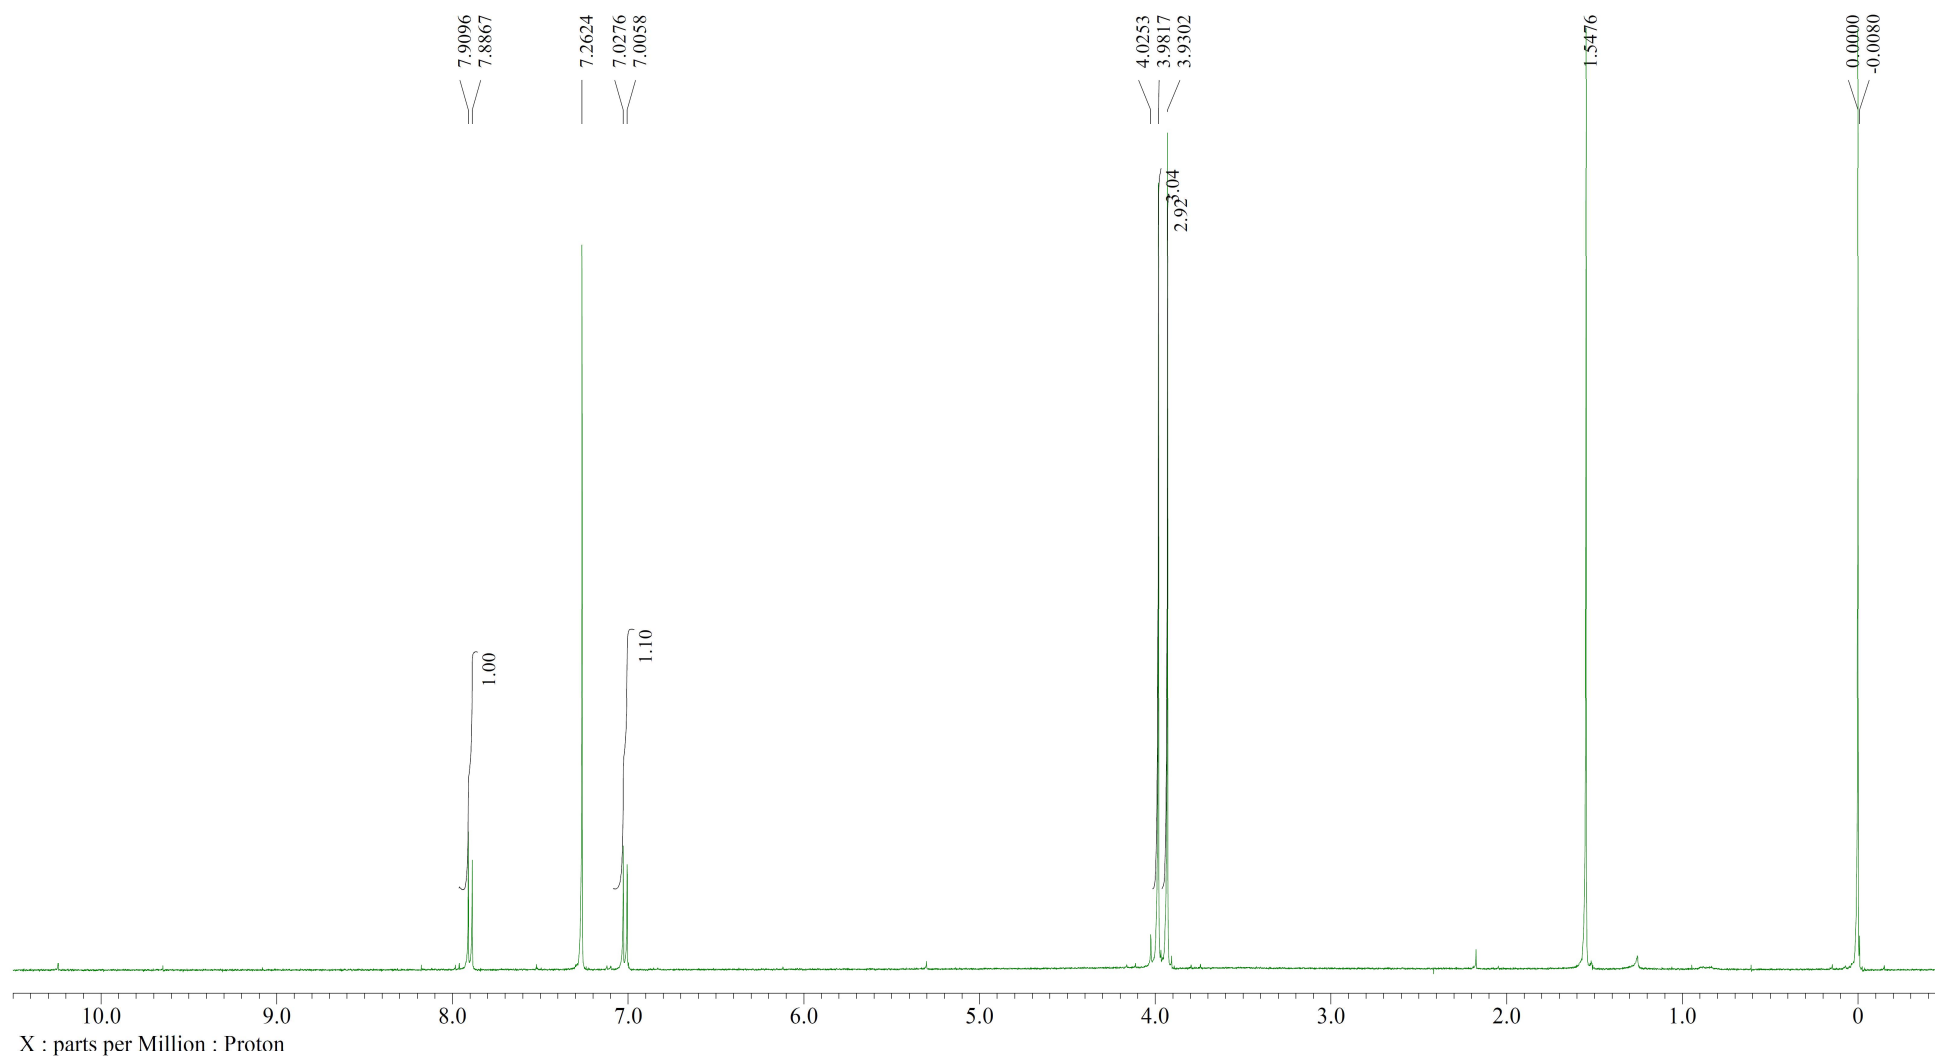



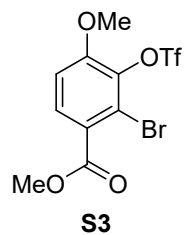

$^{13}\text{C}$ -NMR (100 MHz,  $\text{CDCl}_3$ )

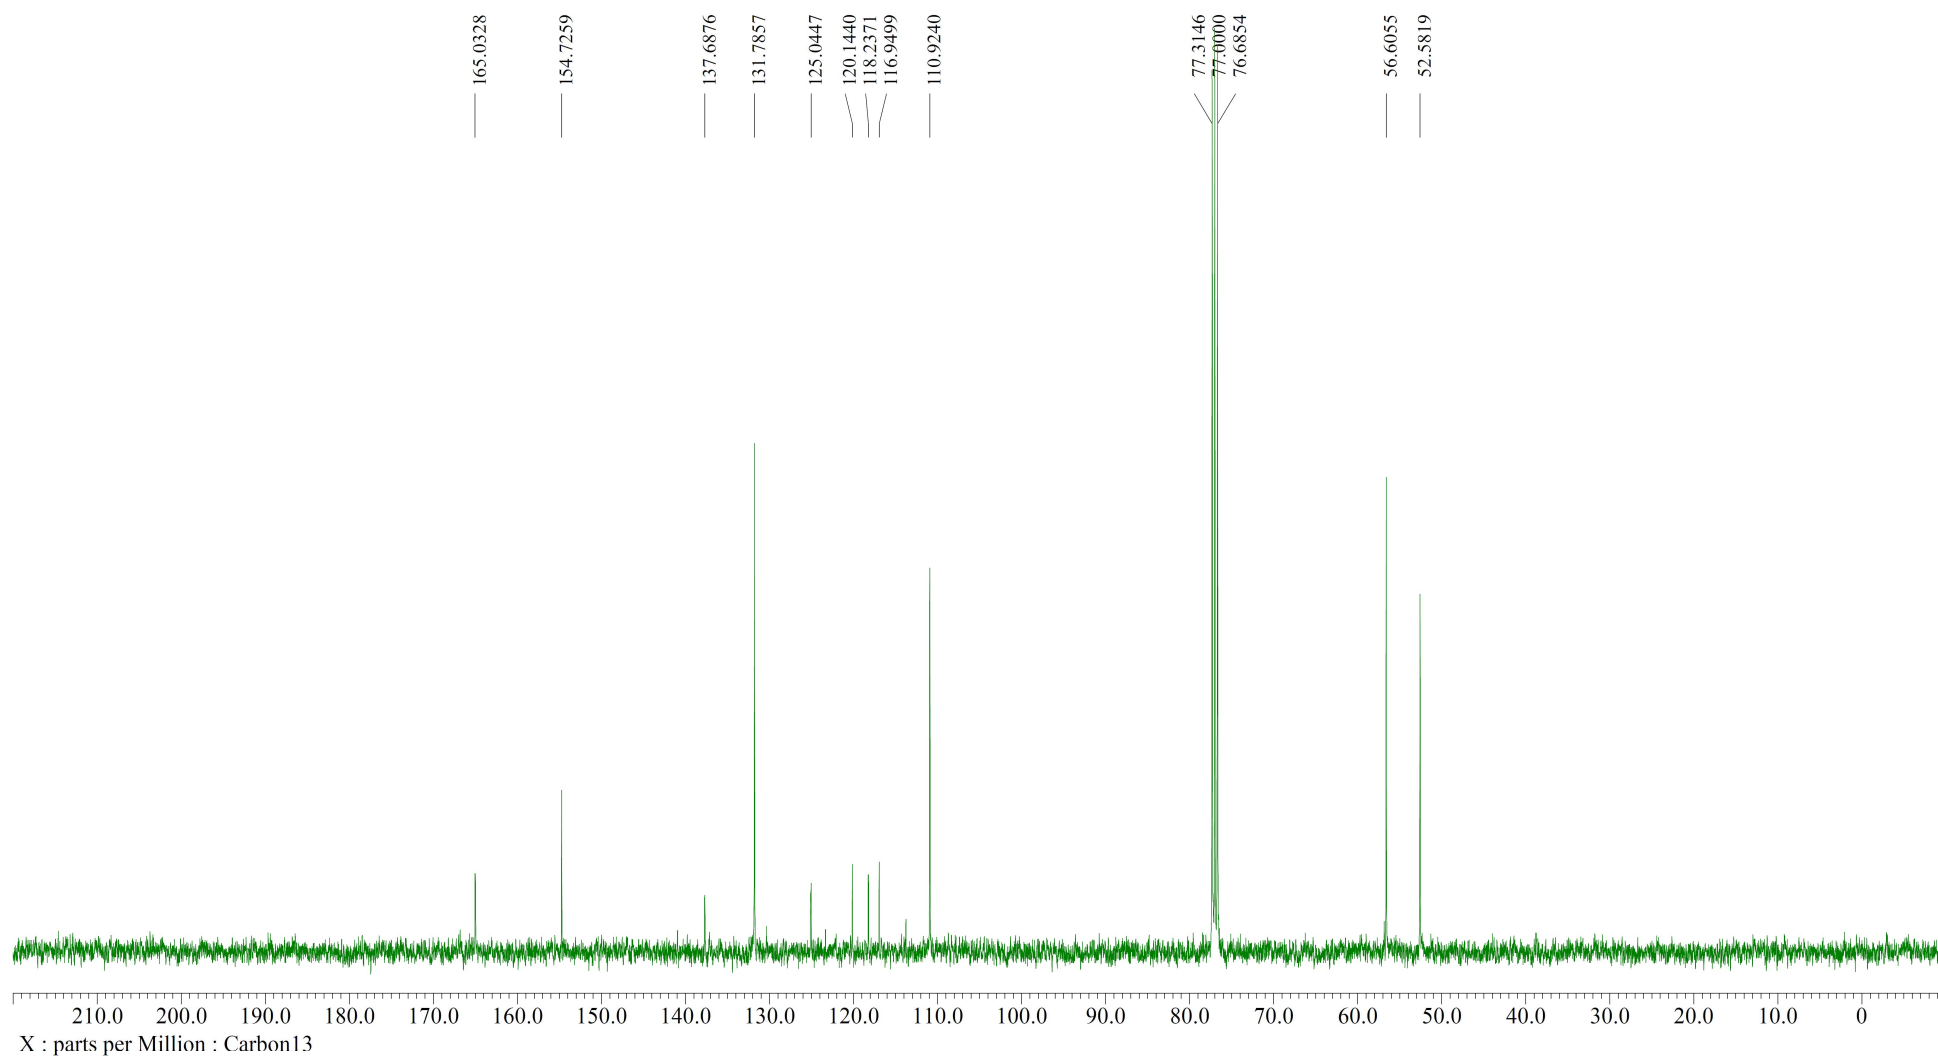

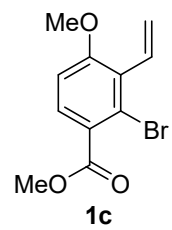

# <sup>1</sup>H-NMR (400 MHz, CDCl<sub>3</sub>)

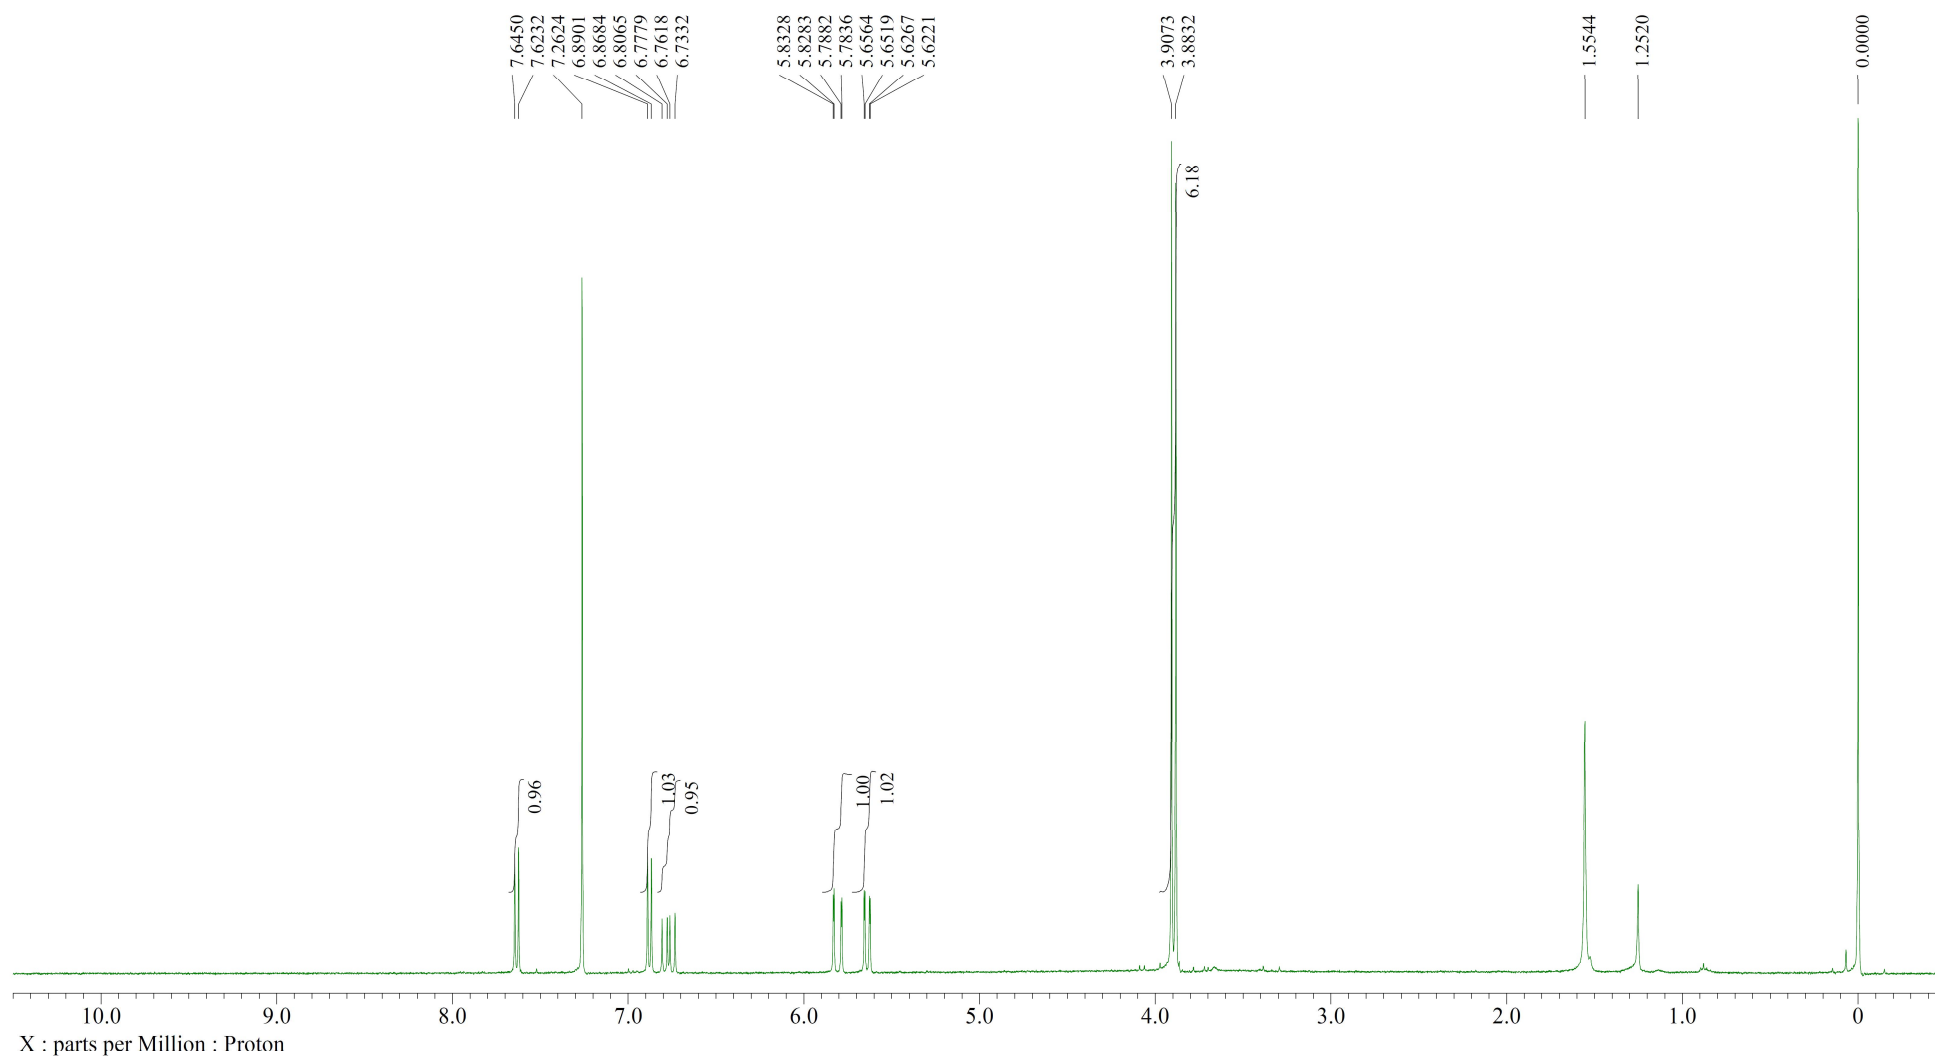

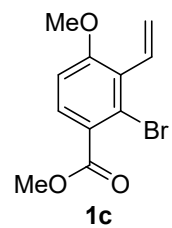

$^{13}\text{C}$ -NMR (100 MHz,  $\text{CDCl}_3$ )

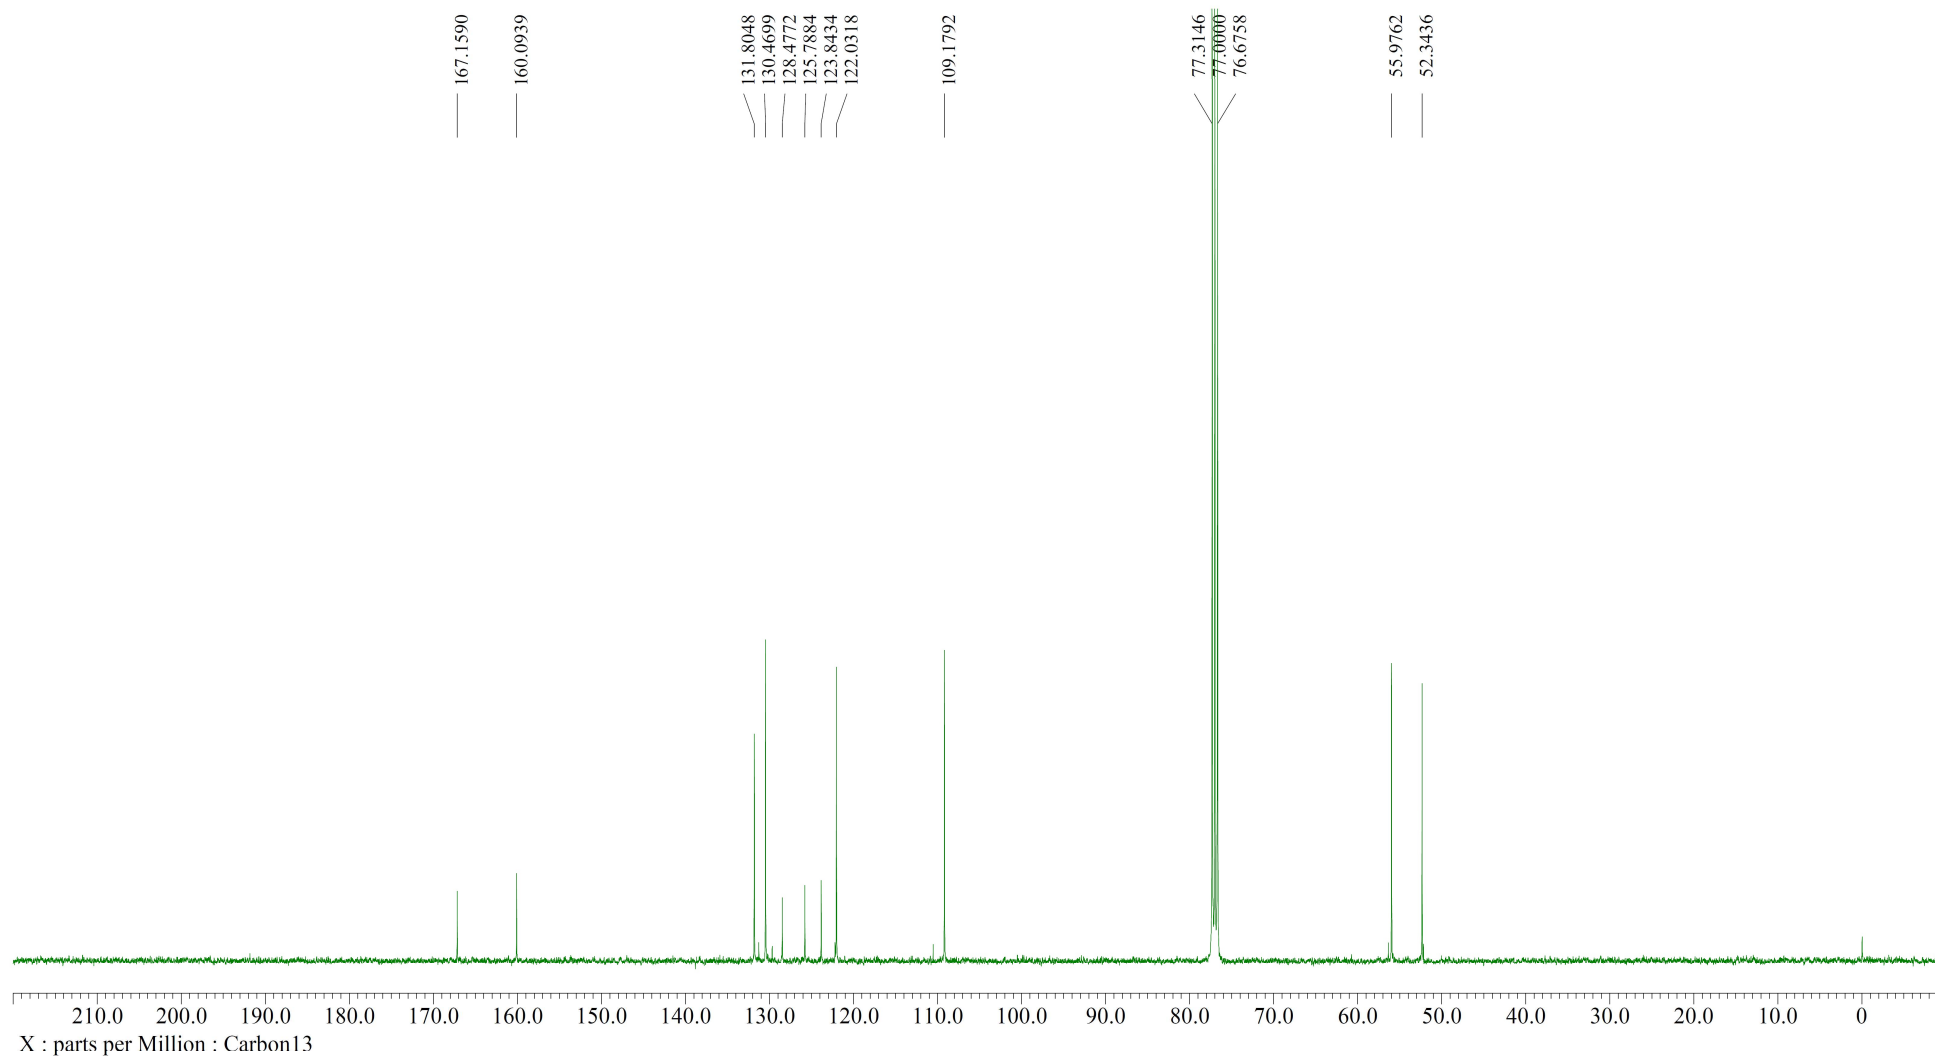

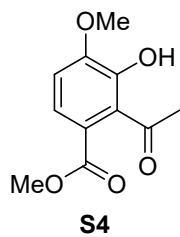

<sup>1</sup>H-NMR (400 MHz, CDCl<sub>3</sub>)

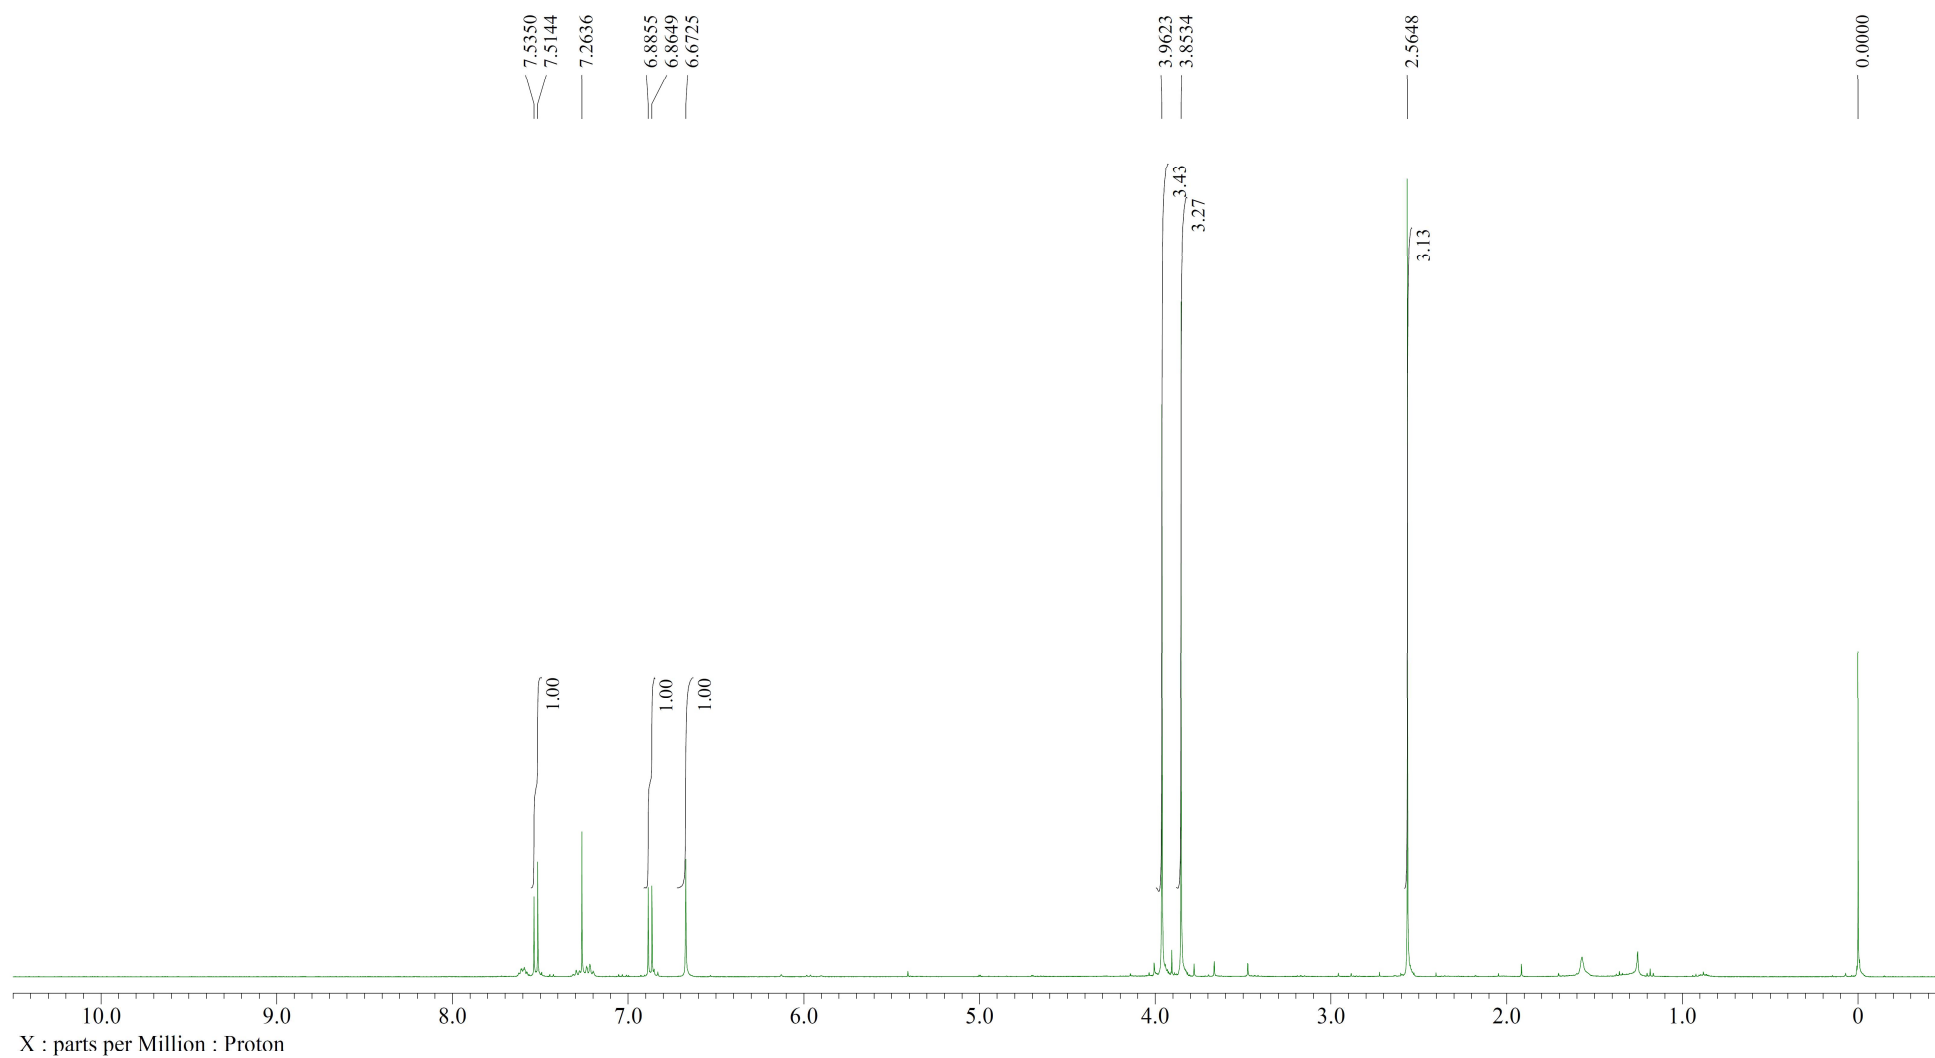

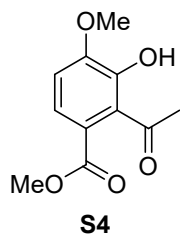

$^{13}\text{C}$ -NMR (100 MHz,  $\text{CDCl}_3$ )

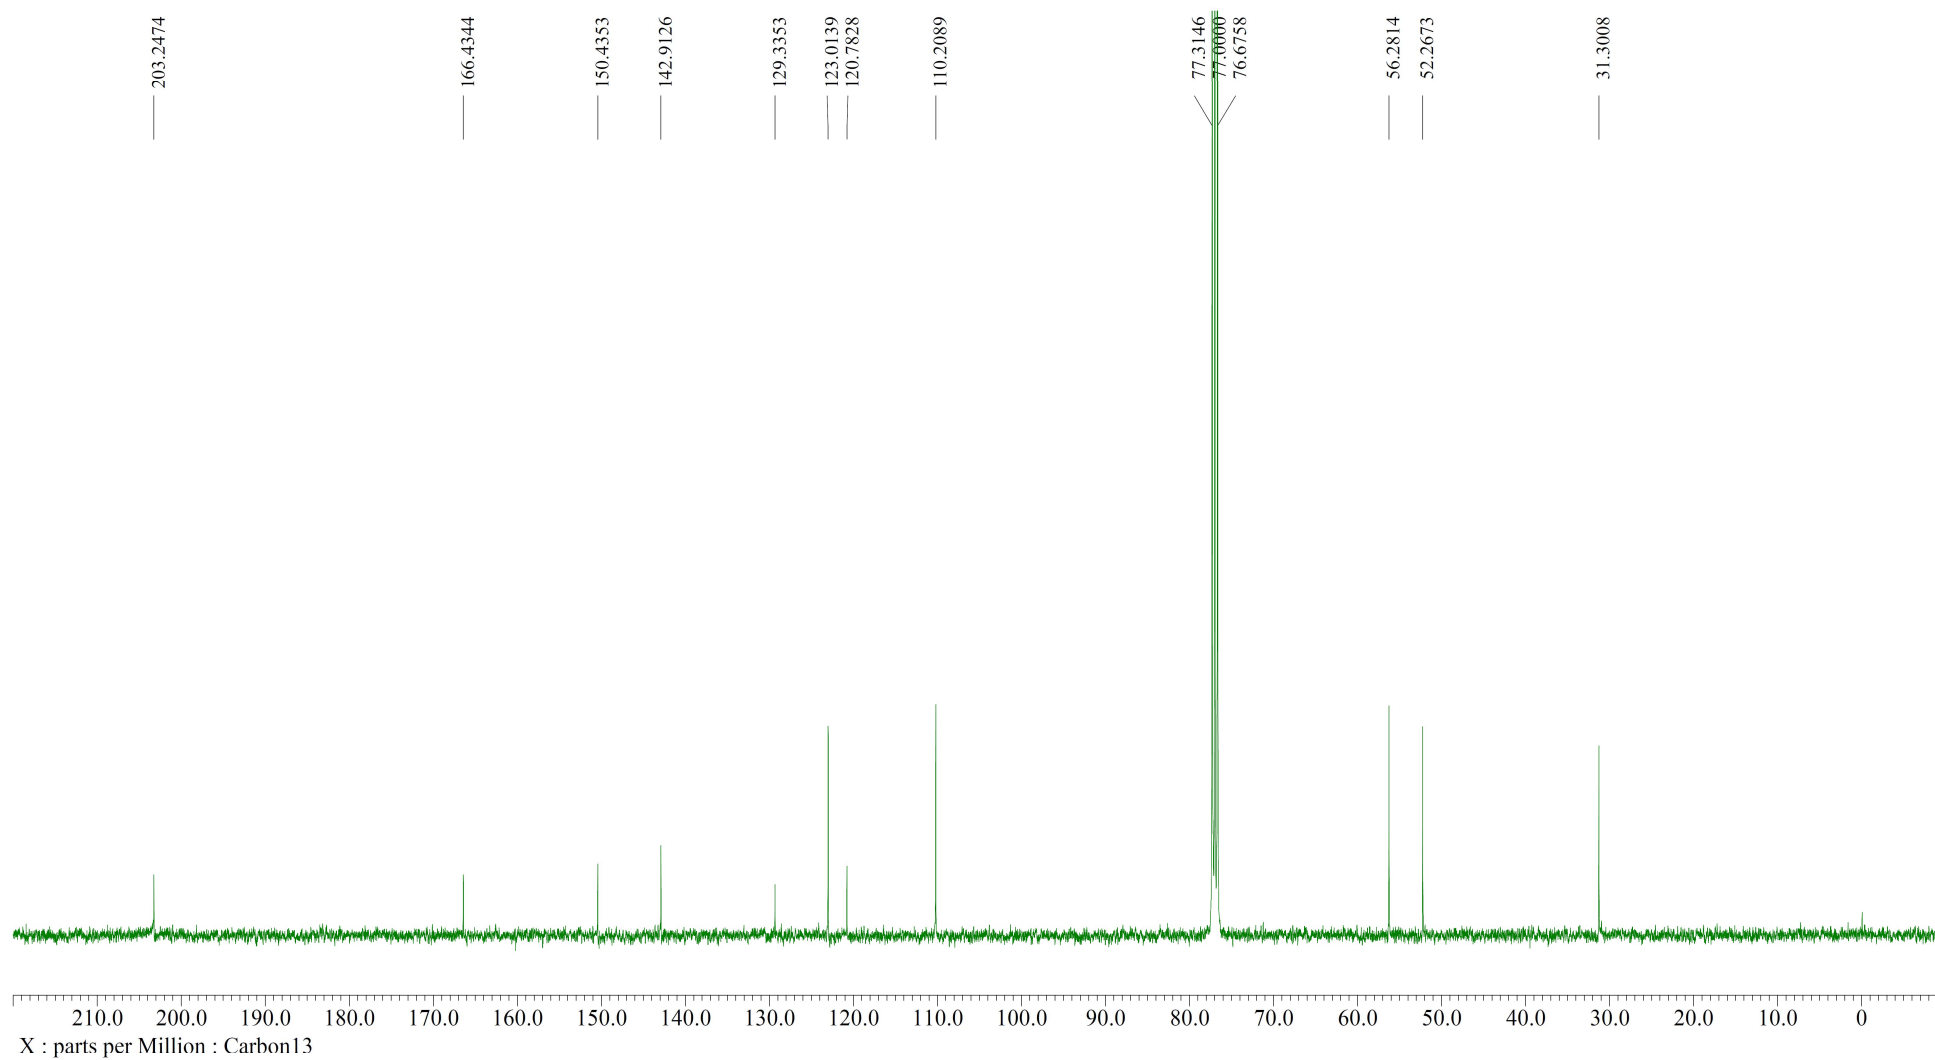

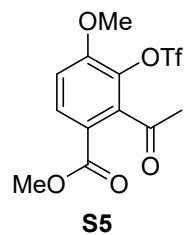

# <sup>1</sup>H-NMR (400 MHz, CDCl<sub>3</sub>)

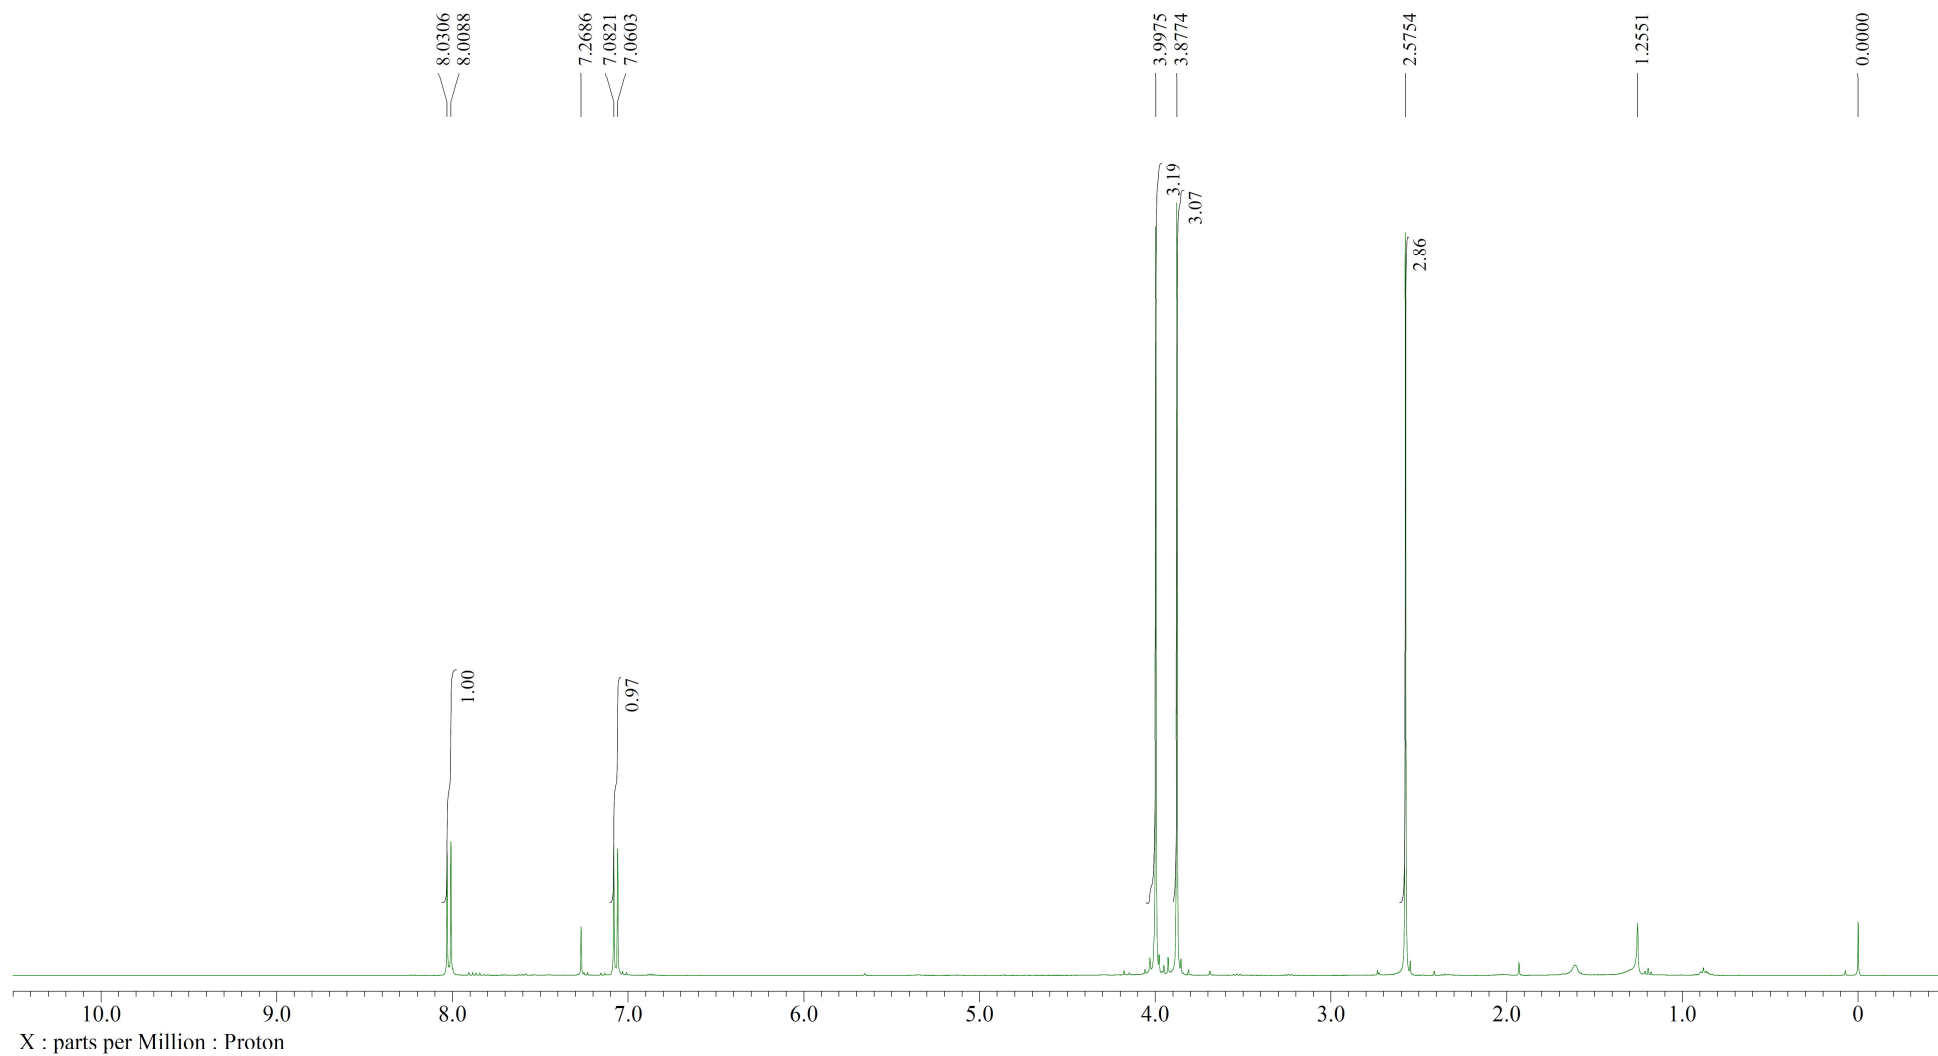

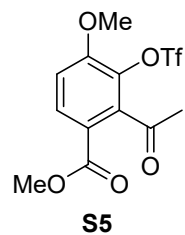

<sup>13</sup>C-NMR (100 MHz, CDCl<sub>3</sub>)

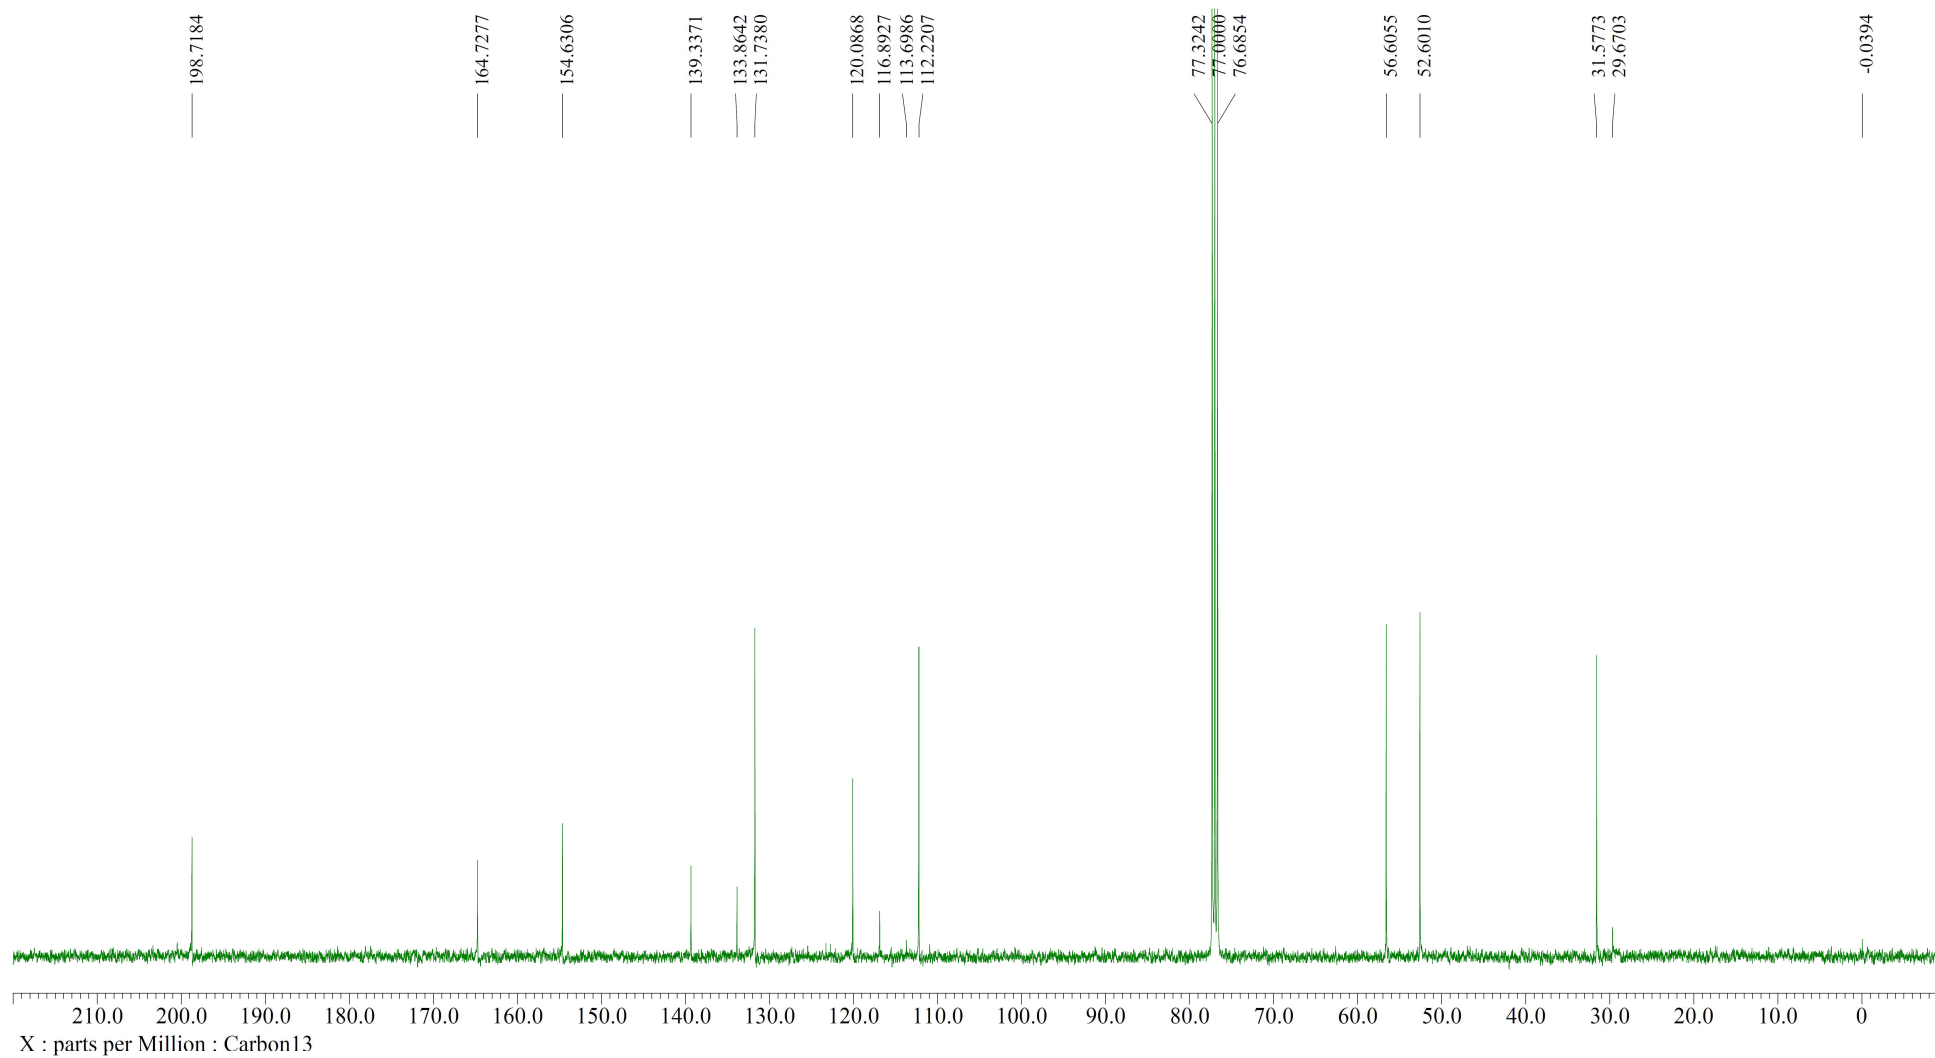

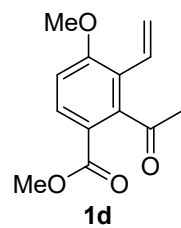

$^1\text{H-NMR}$  (400 MHz,  $\text{CDCl}_3$ )

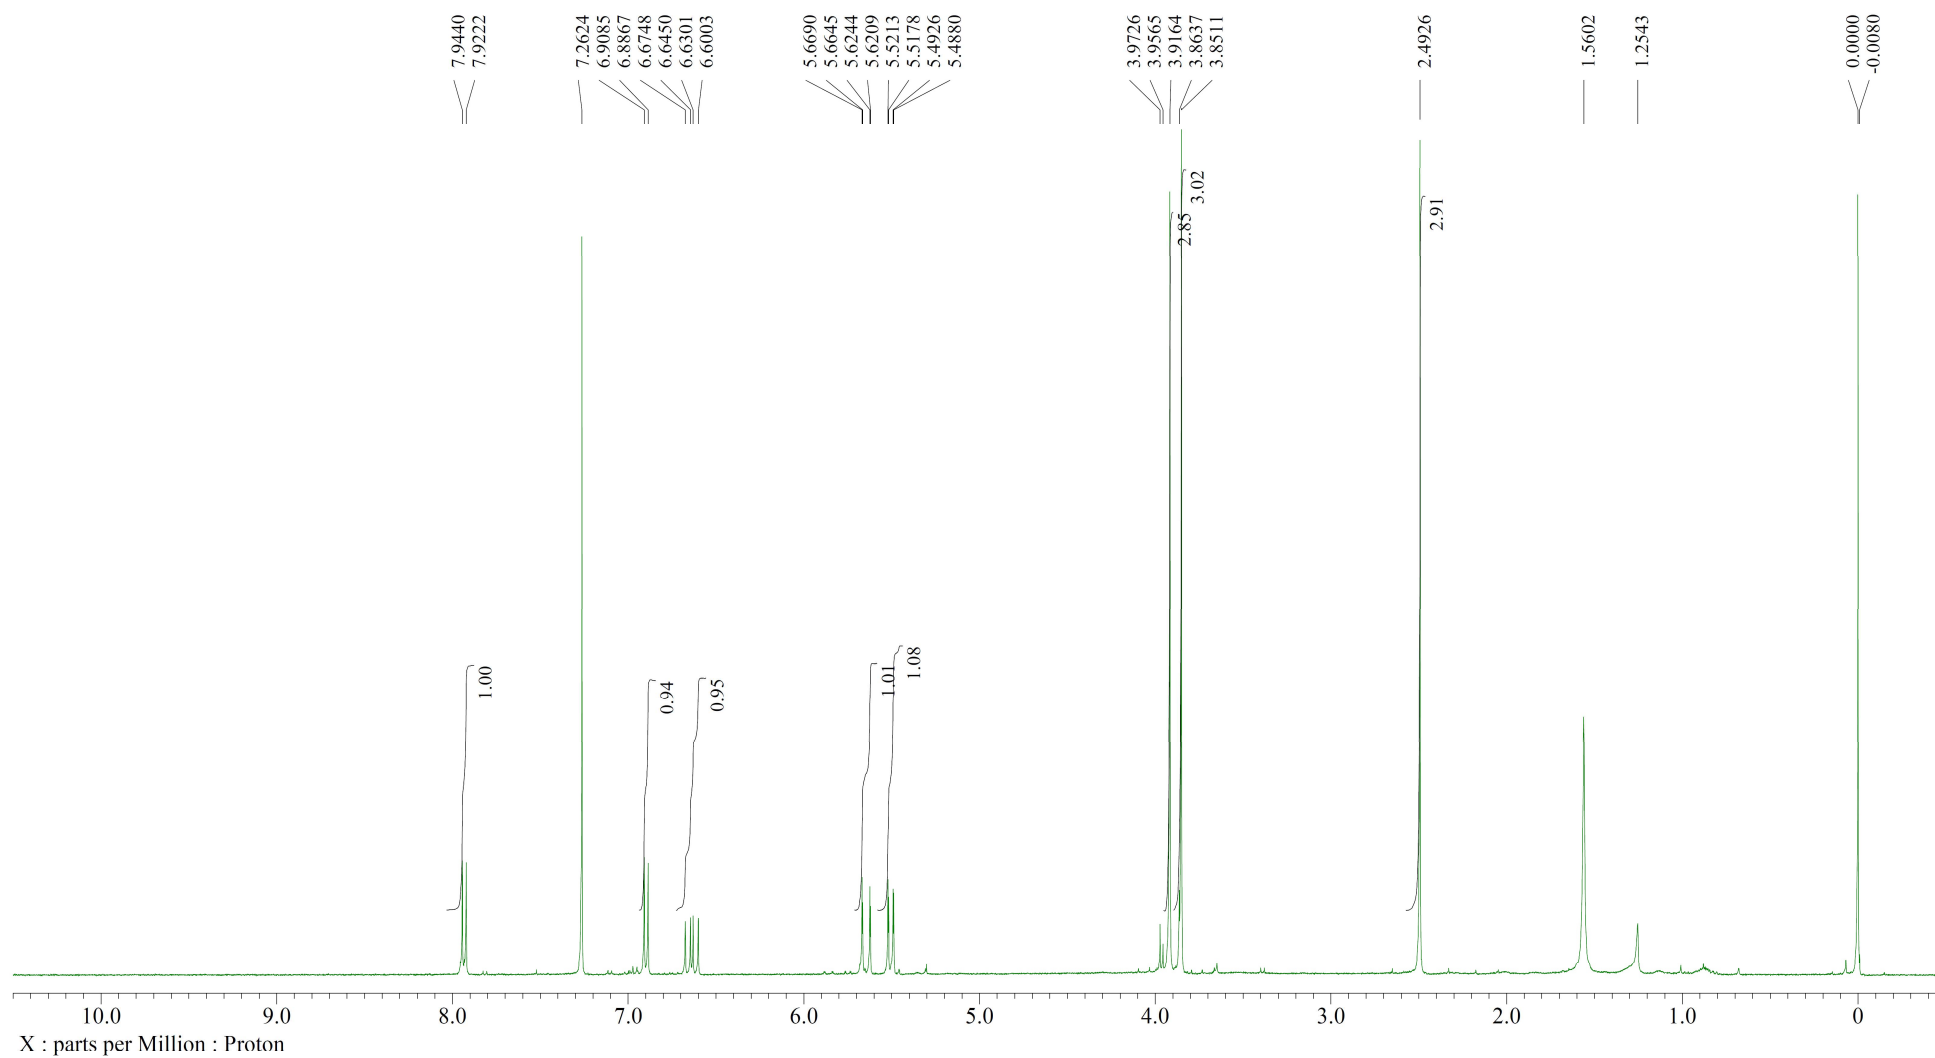





$^{13}\text{C}$ -NMR (100 MHz,  $\text{CDCl}_3$ )

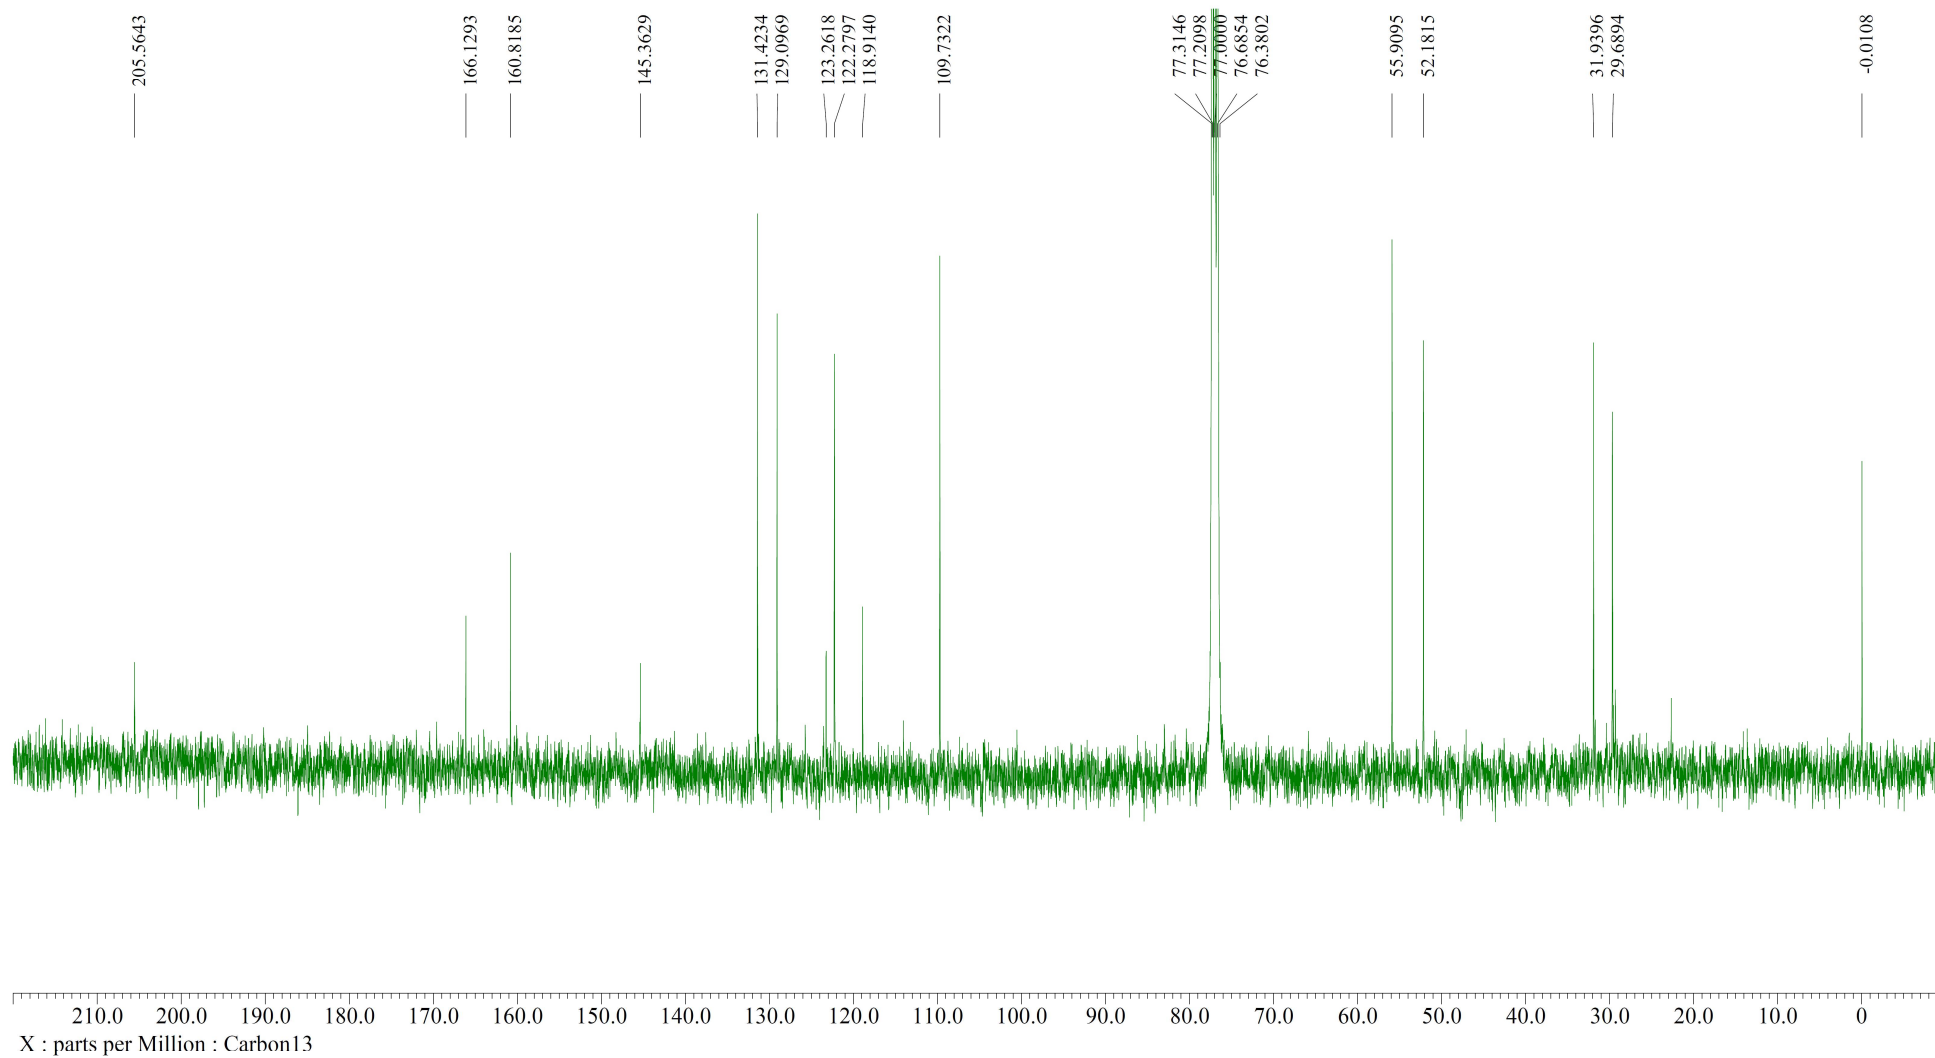

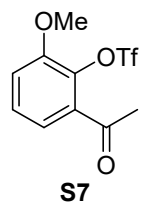

$^1\text{H}$ -NMR (400 MHz,  $\text{CDCl}_3$ )

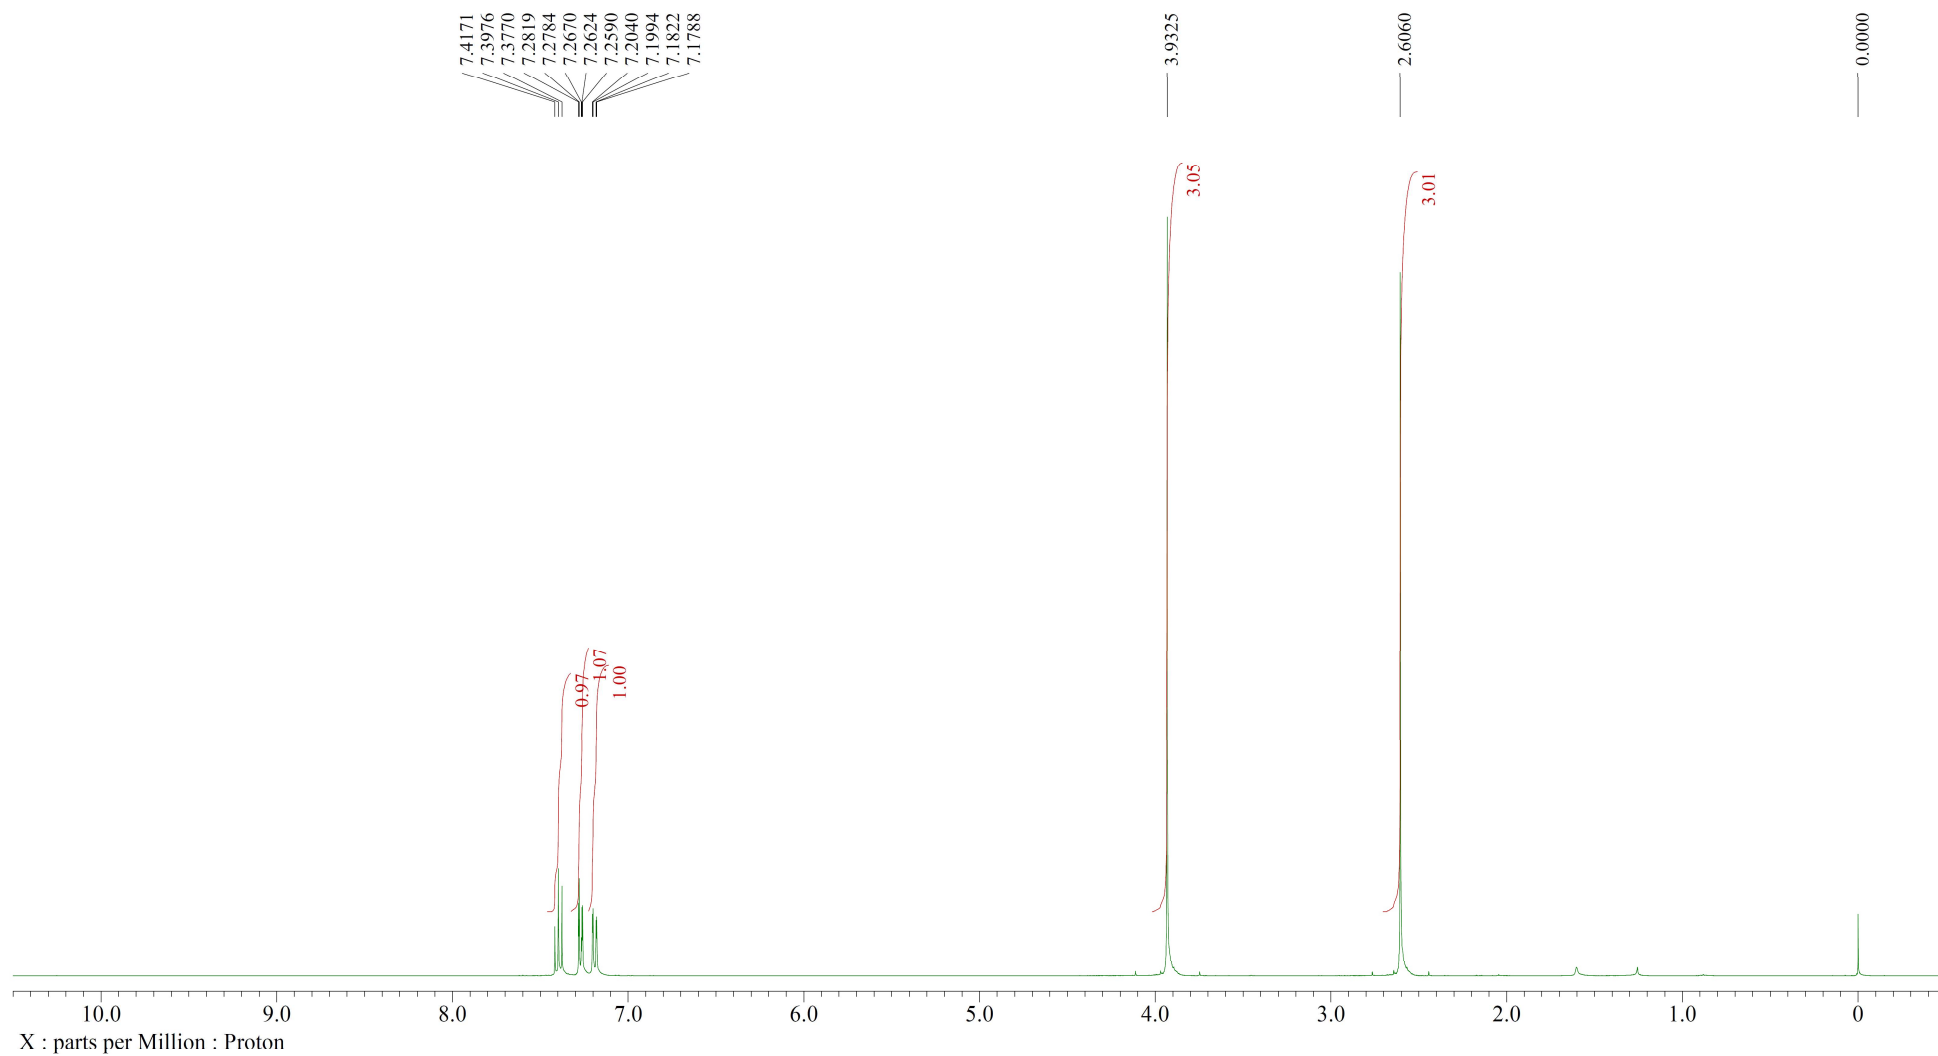

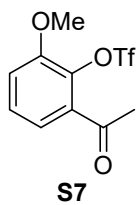

# $^{13}\text{C}$ -NMR (100 MHz, $\text{CDCl}_3$ )

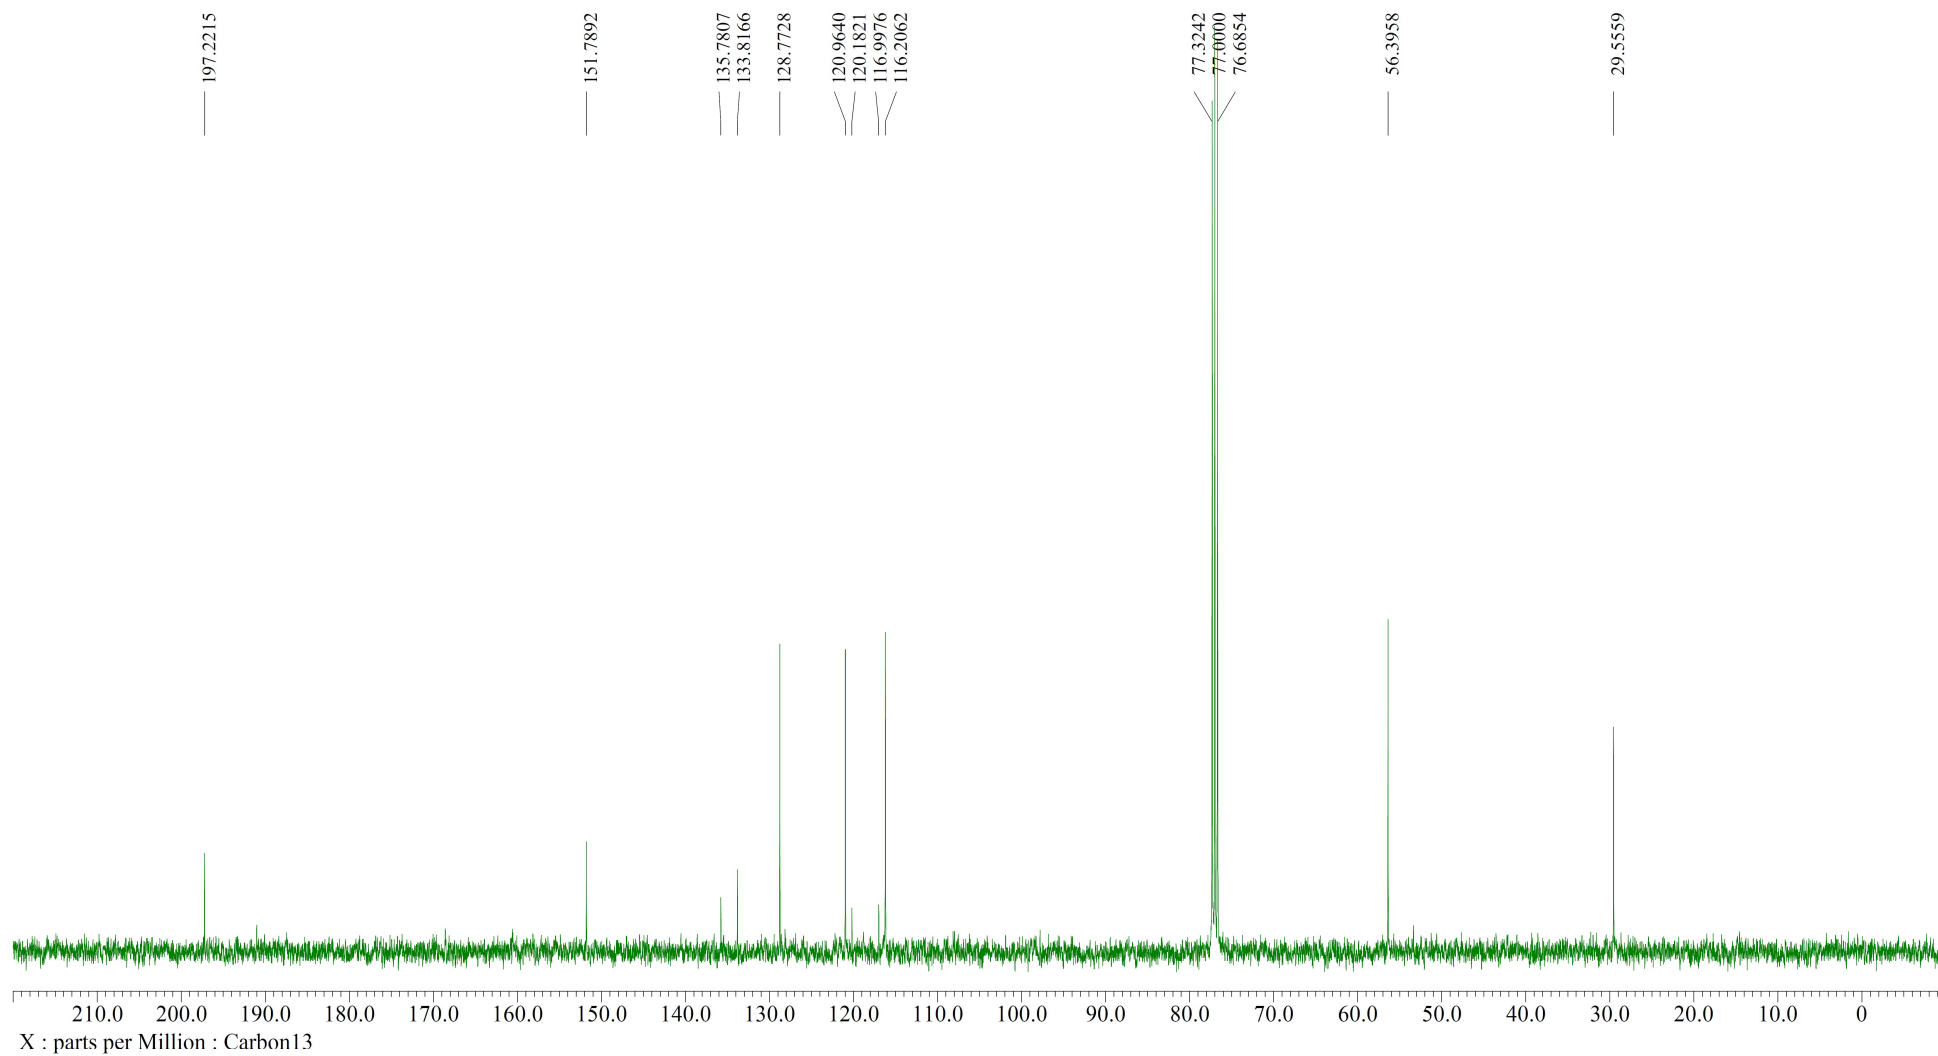

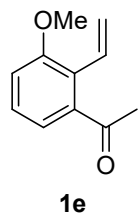

# <sup>1</sup>H-NMR (400 MHz, CDCl<sub>3</sub>)

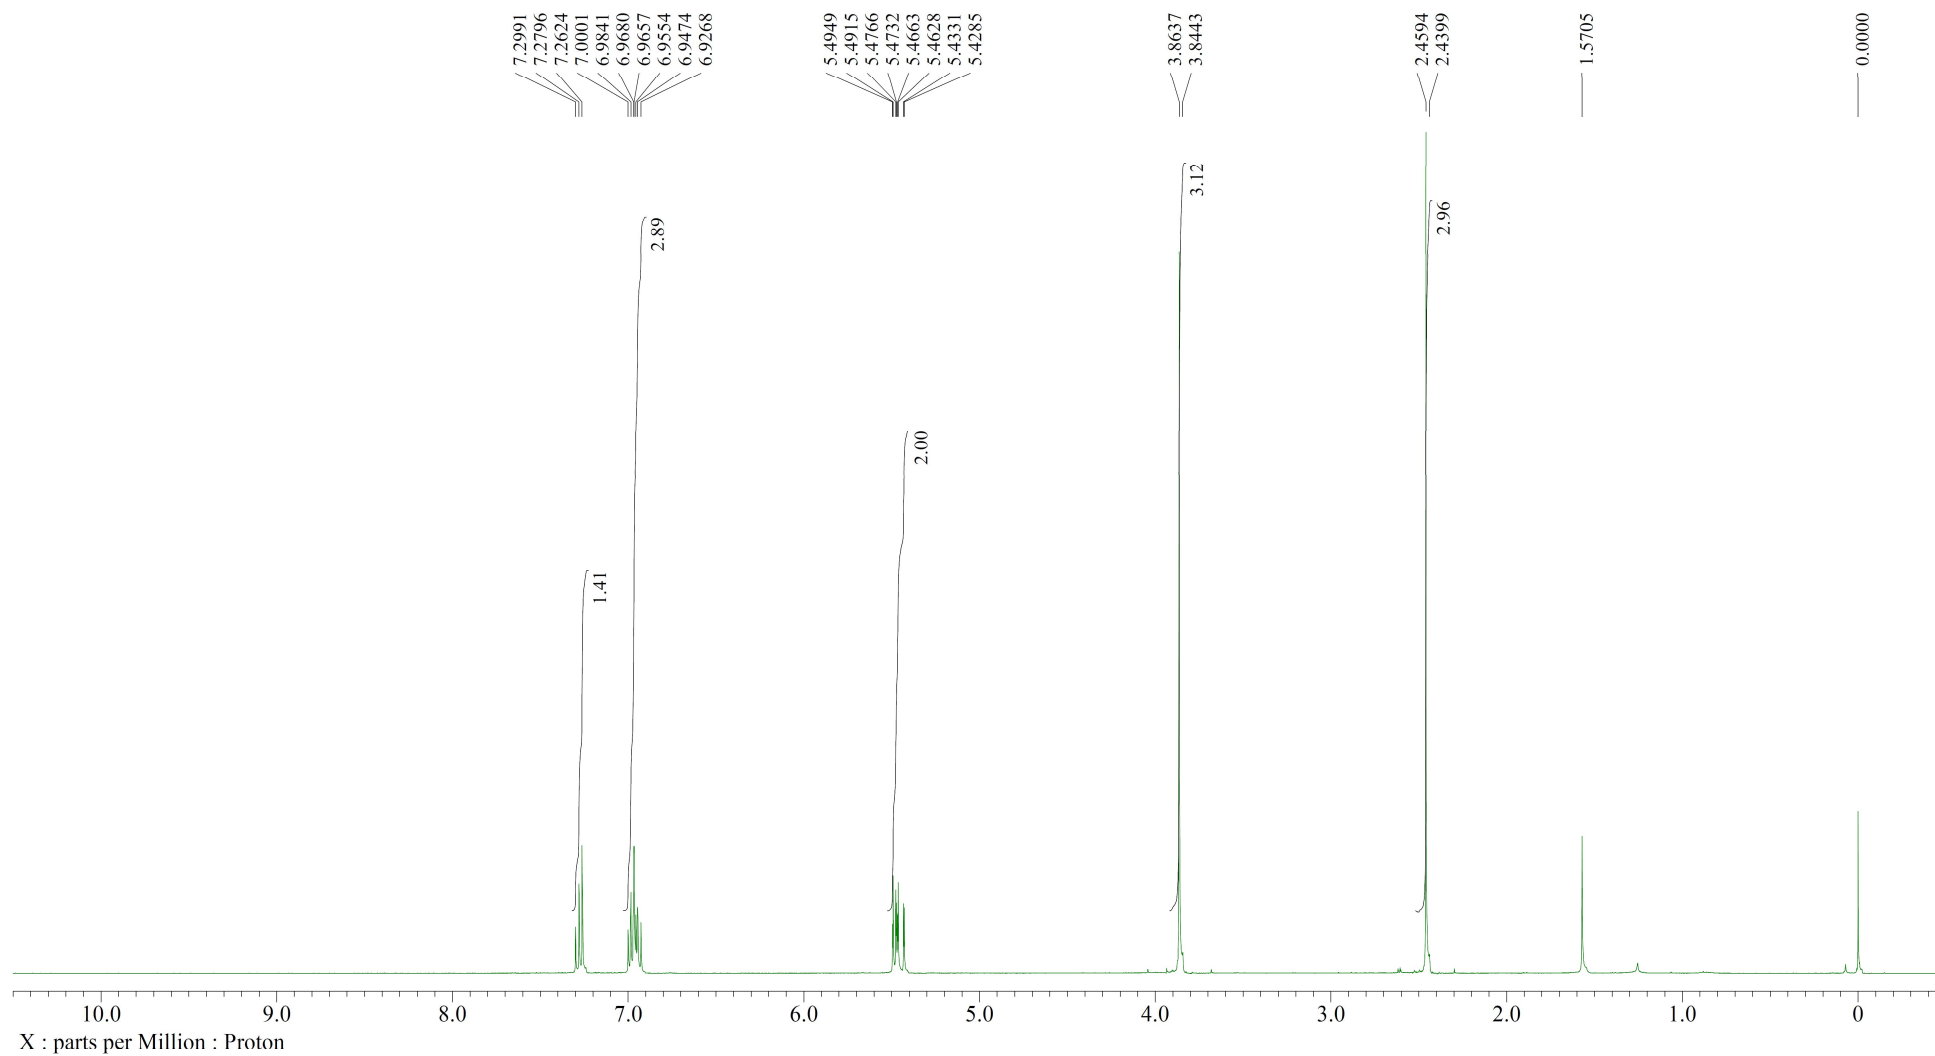

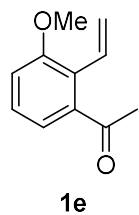

$^{13}\text{C}$ -NMR (100 MHz,  $\text{CDCl}_3$ )

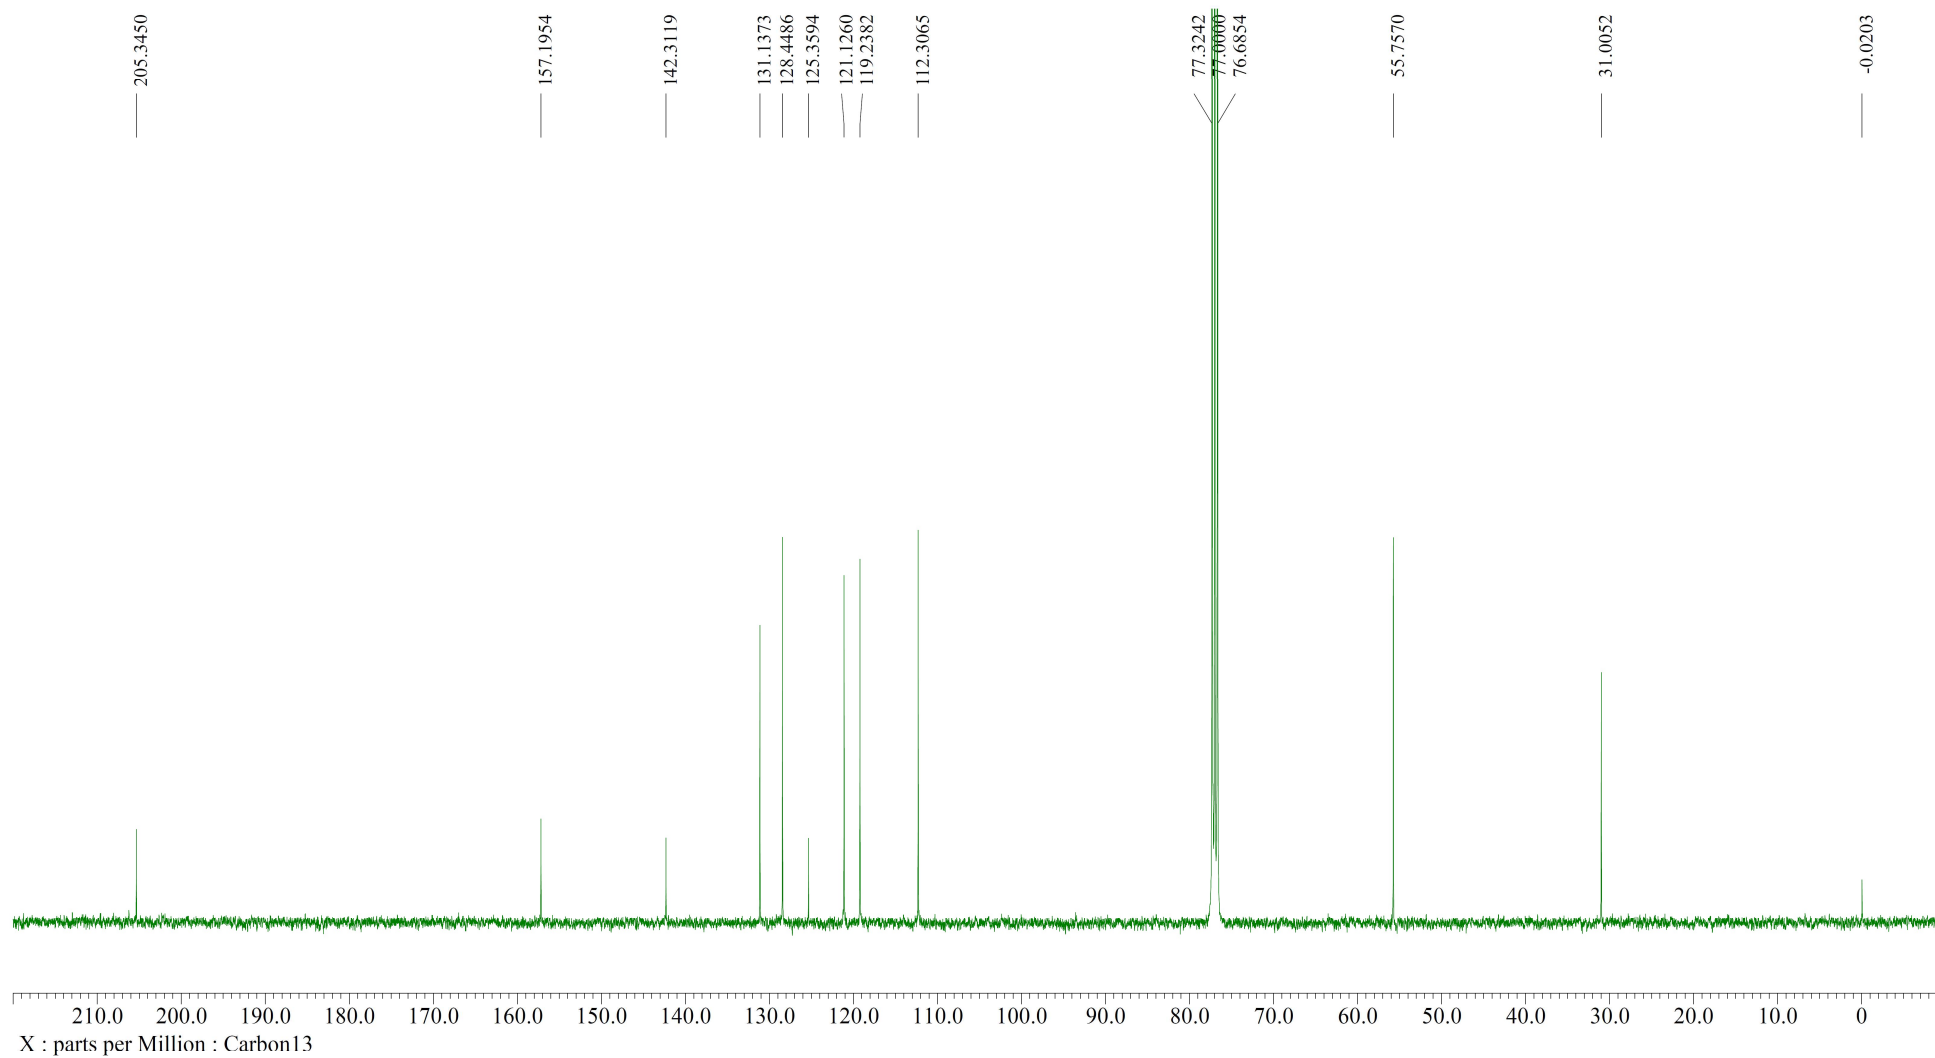

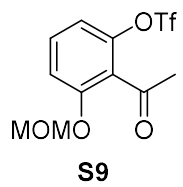

<sup>1</sup>H-NMR (400 MHz, CDCl<sub>3</sub>)

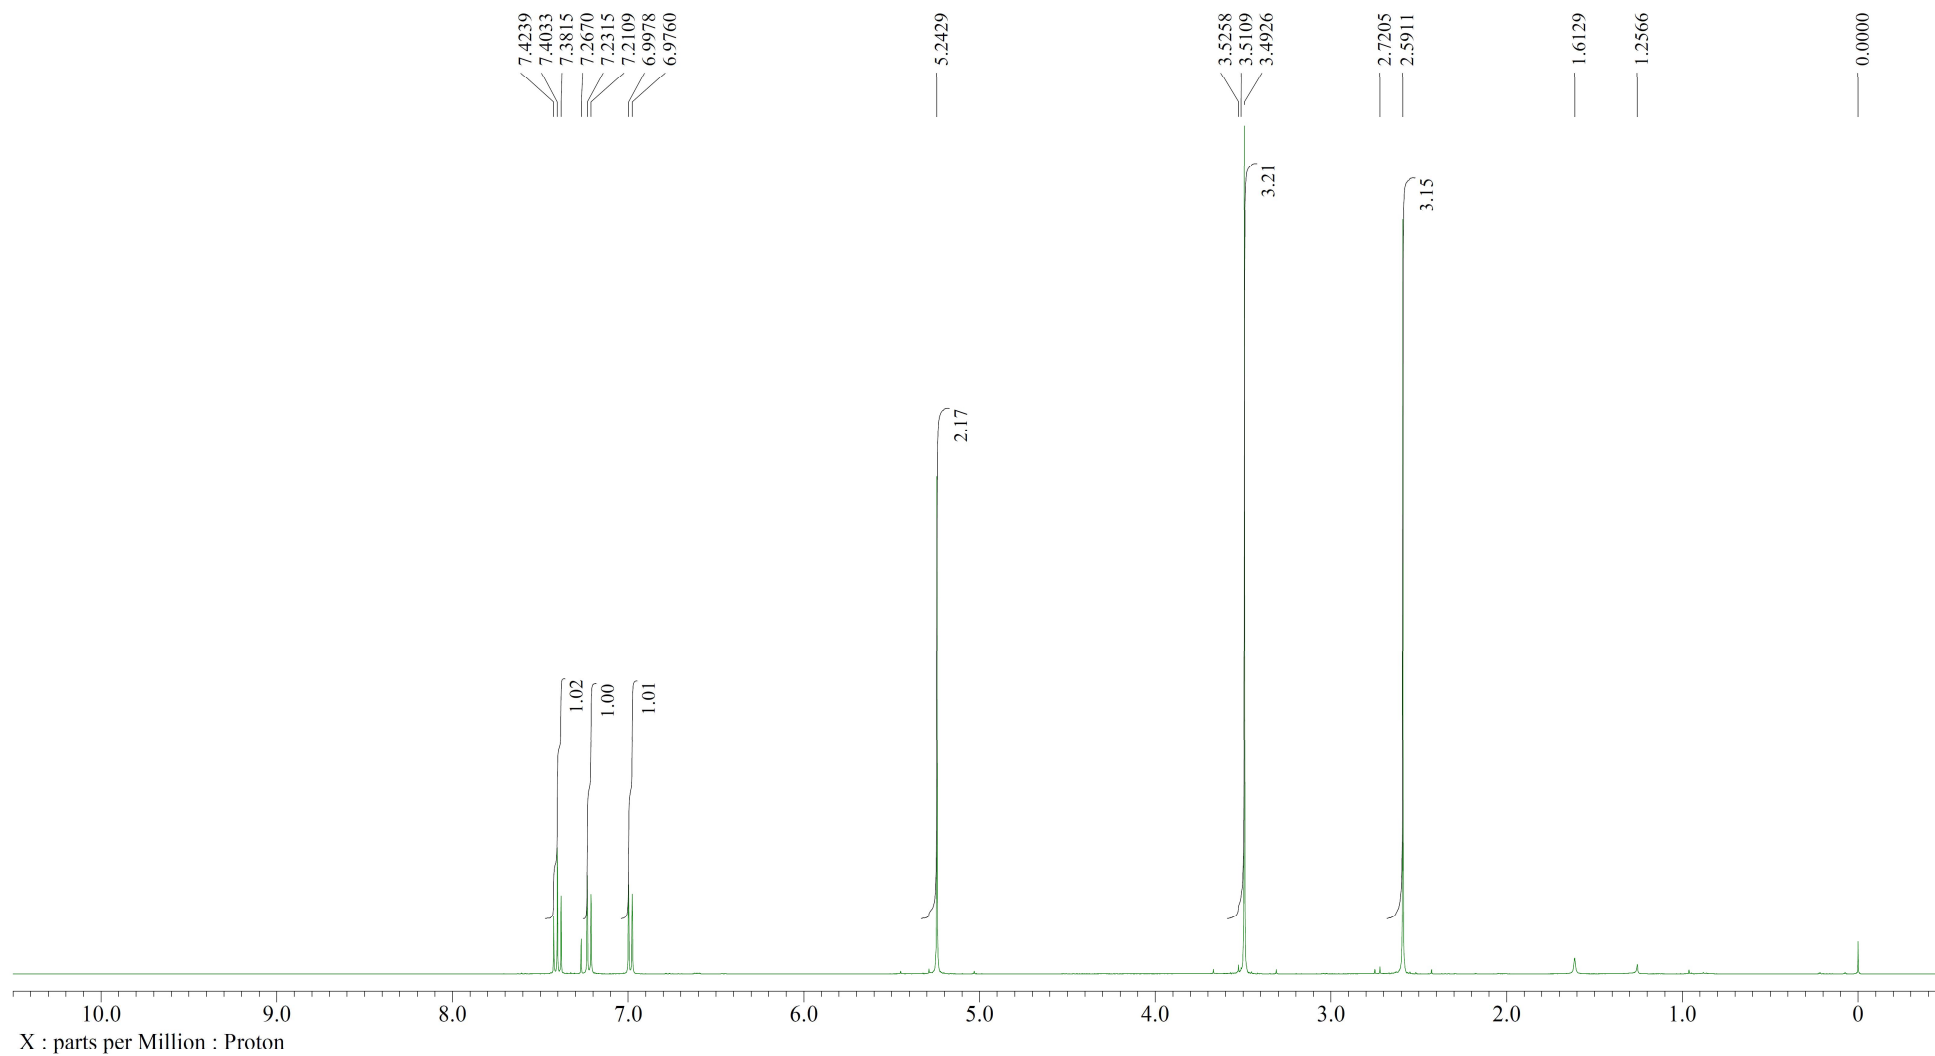

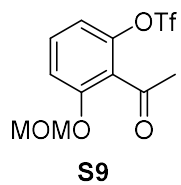

$^{13}\text{C}$ -NMR (100 MHz,  $\text{CDCl}_3$ )

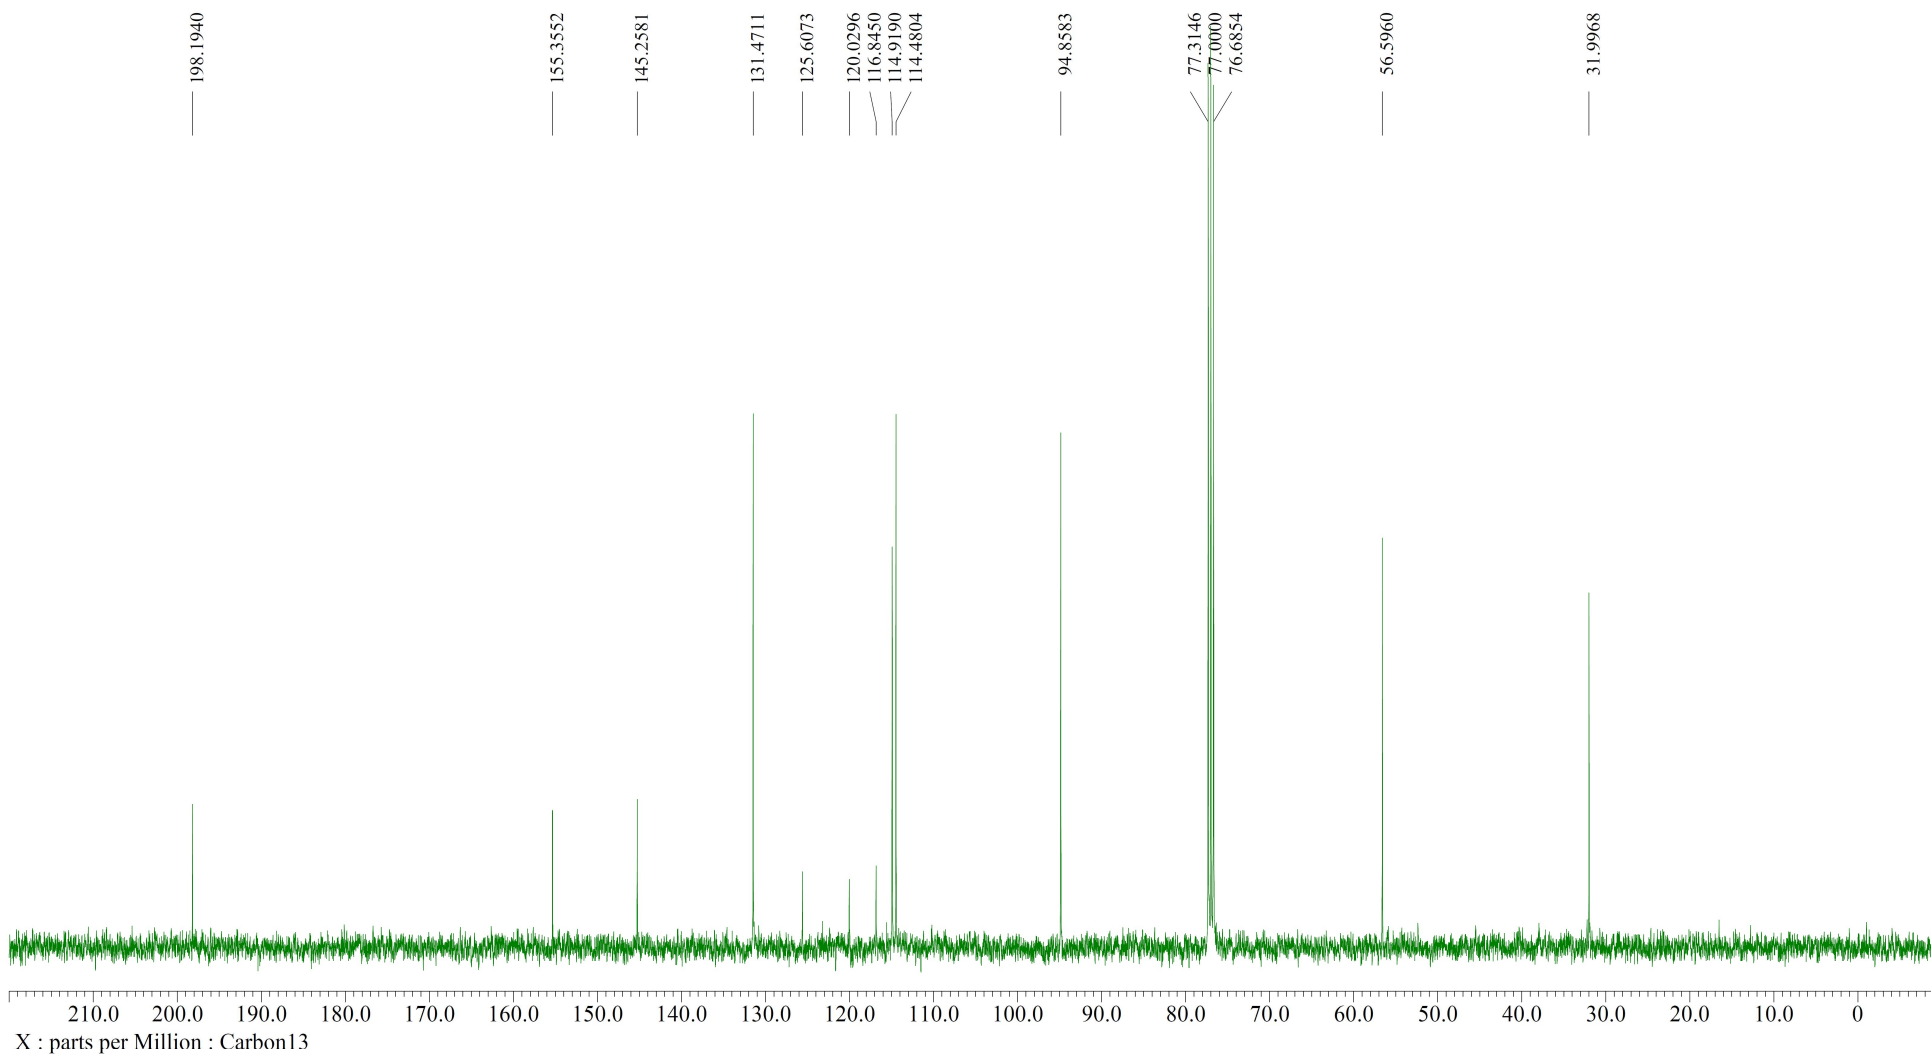

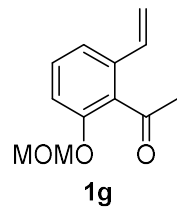

# <sup>1</sup>H-NMR (400 MHz, CDCl<sub>3</sub>)

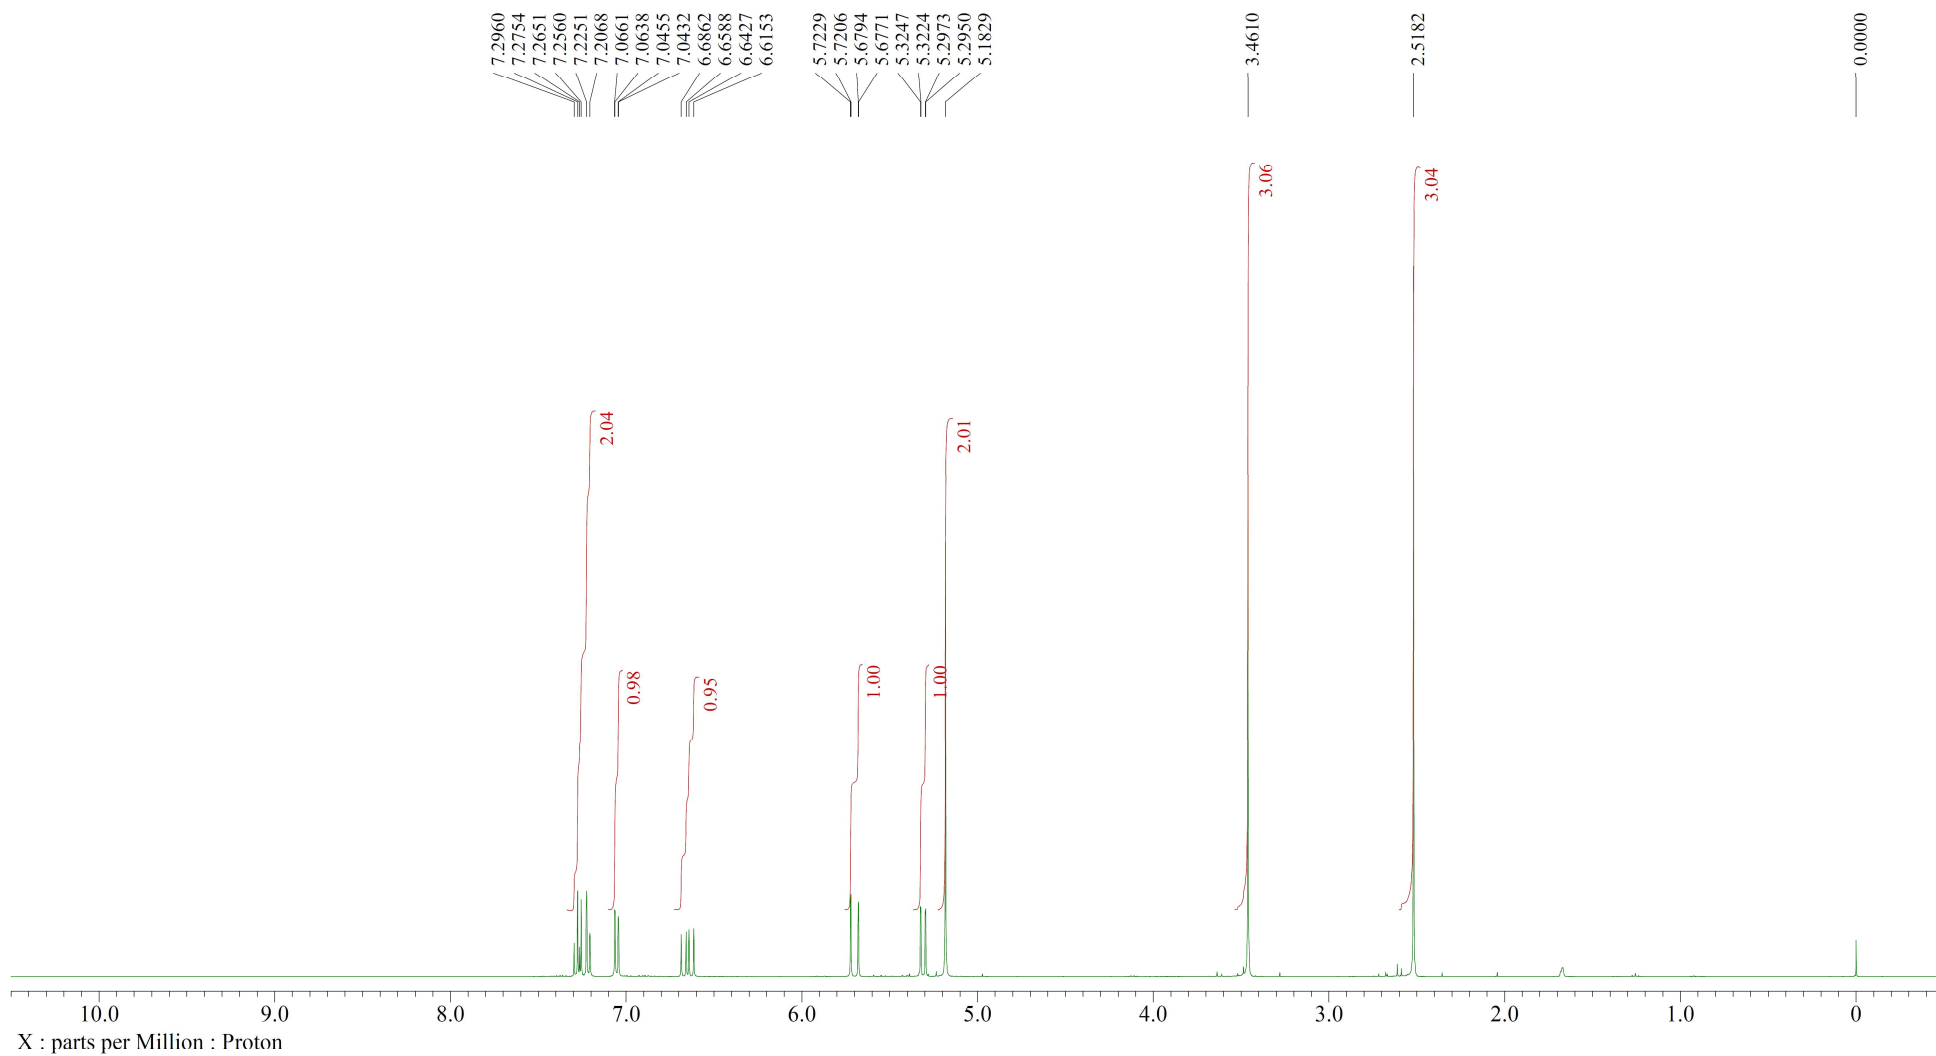



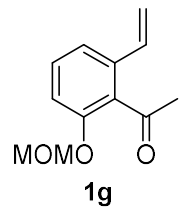

$^{13}\text{C}$ -NMR (100 MHz,  $\text{CDCl}_3$ )

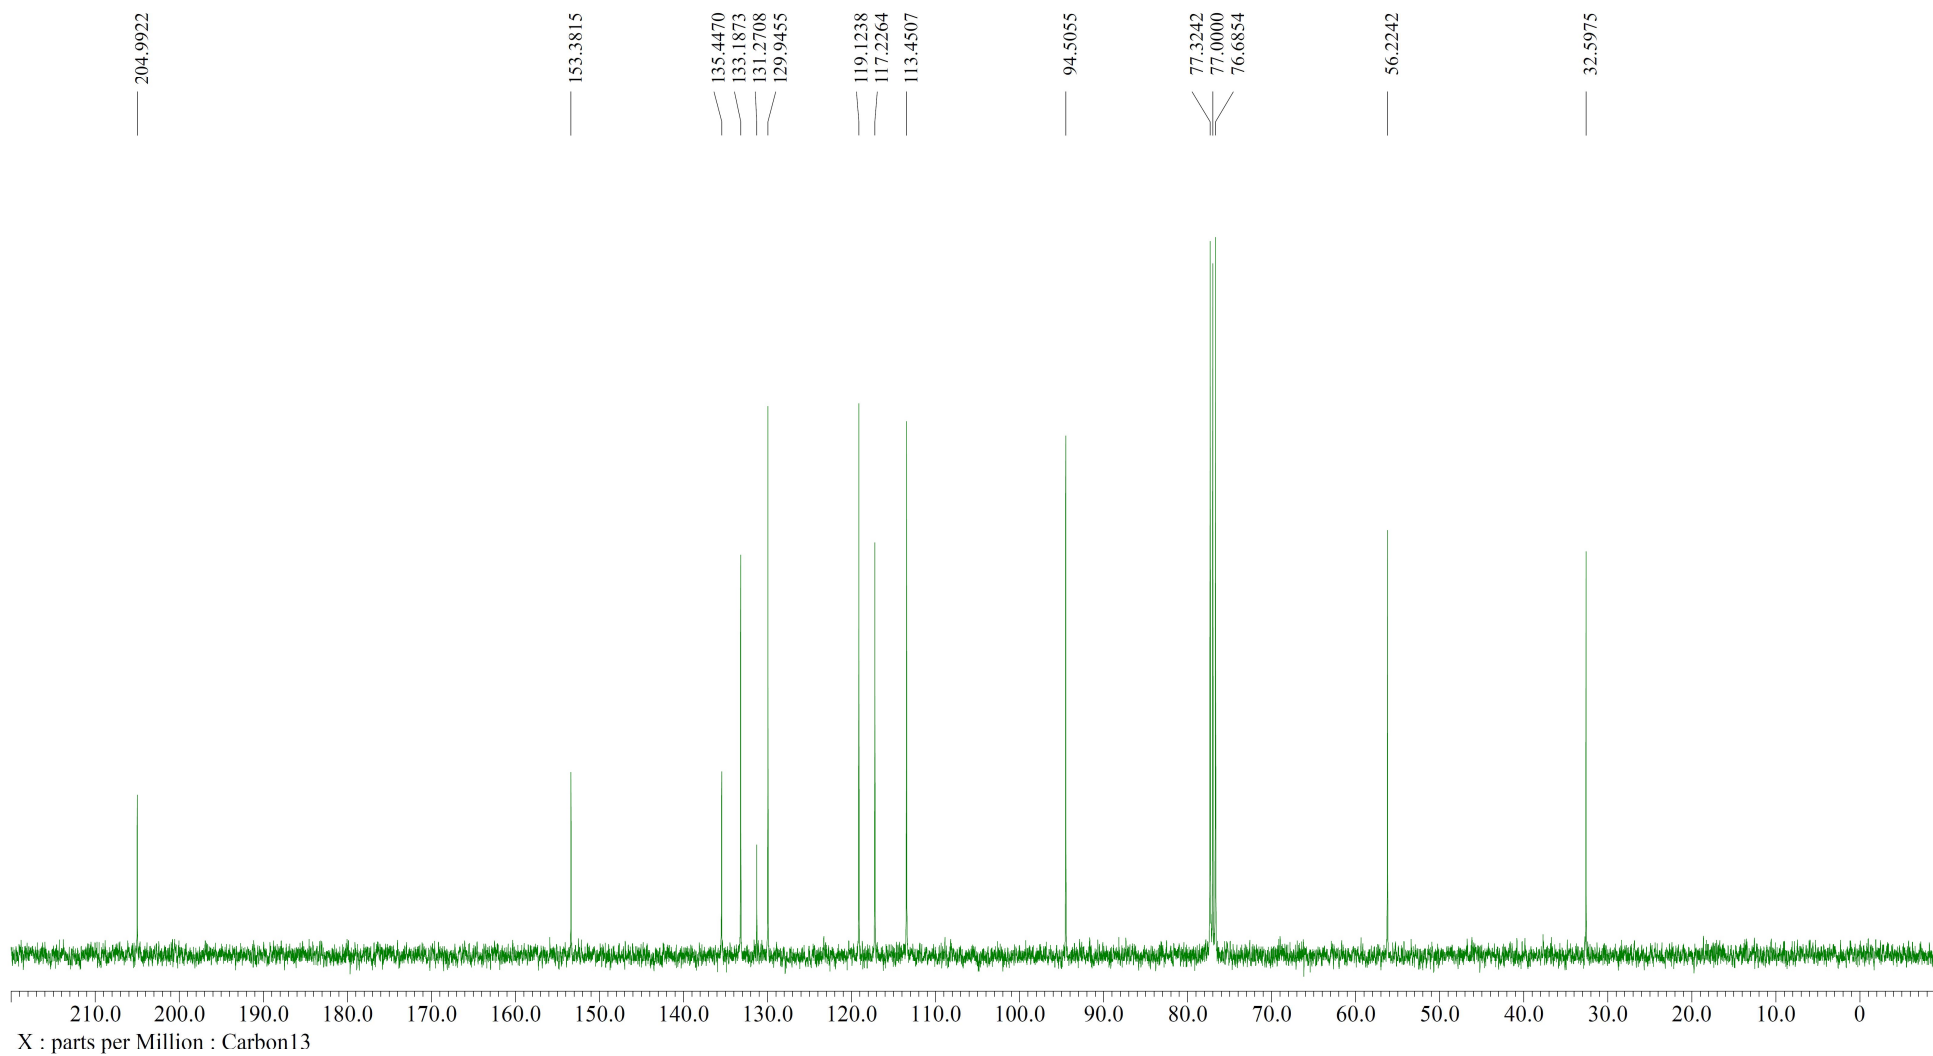

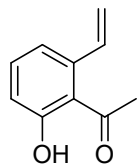

S10

$^1\text{H}$ -NMR (400 MHz,  $\text{CDCl}_3$ )

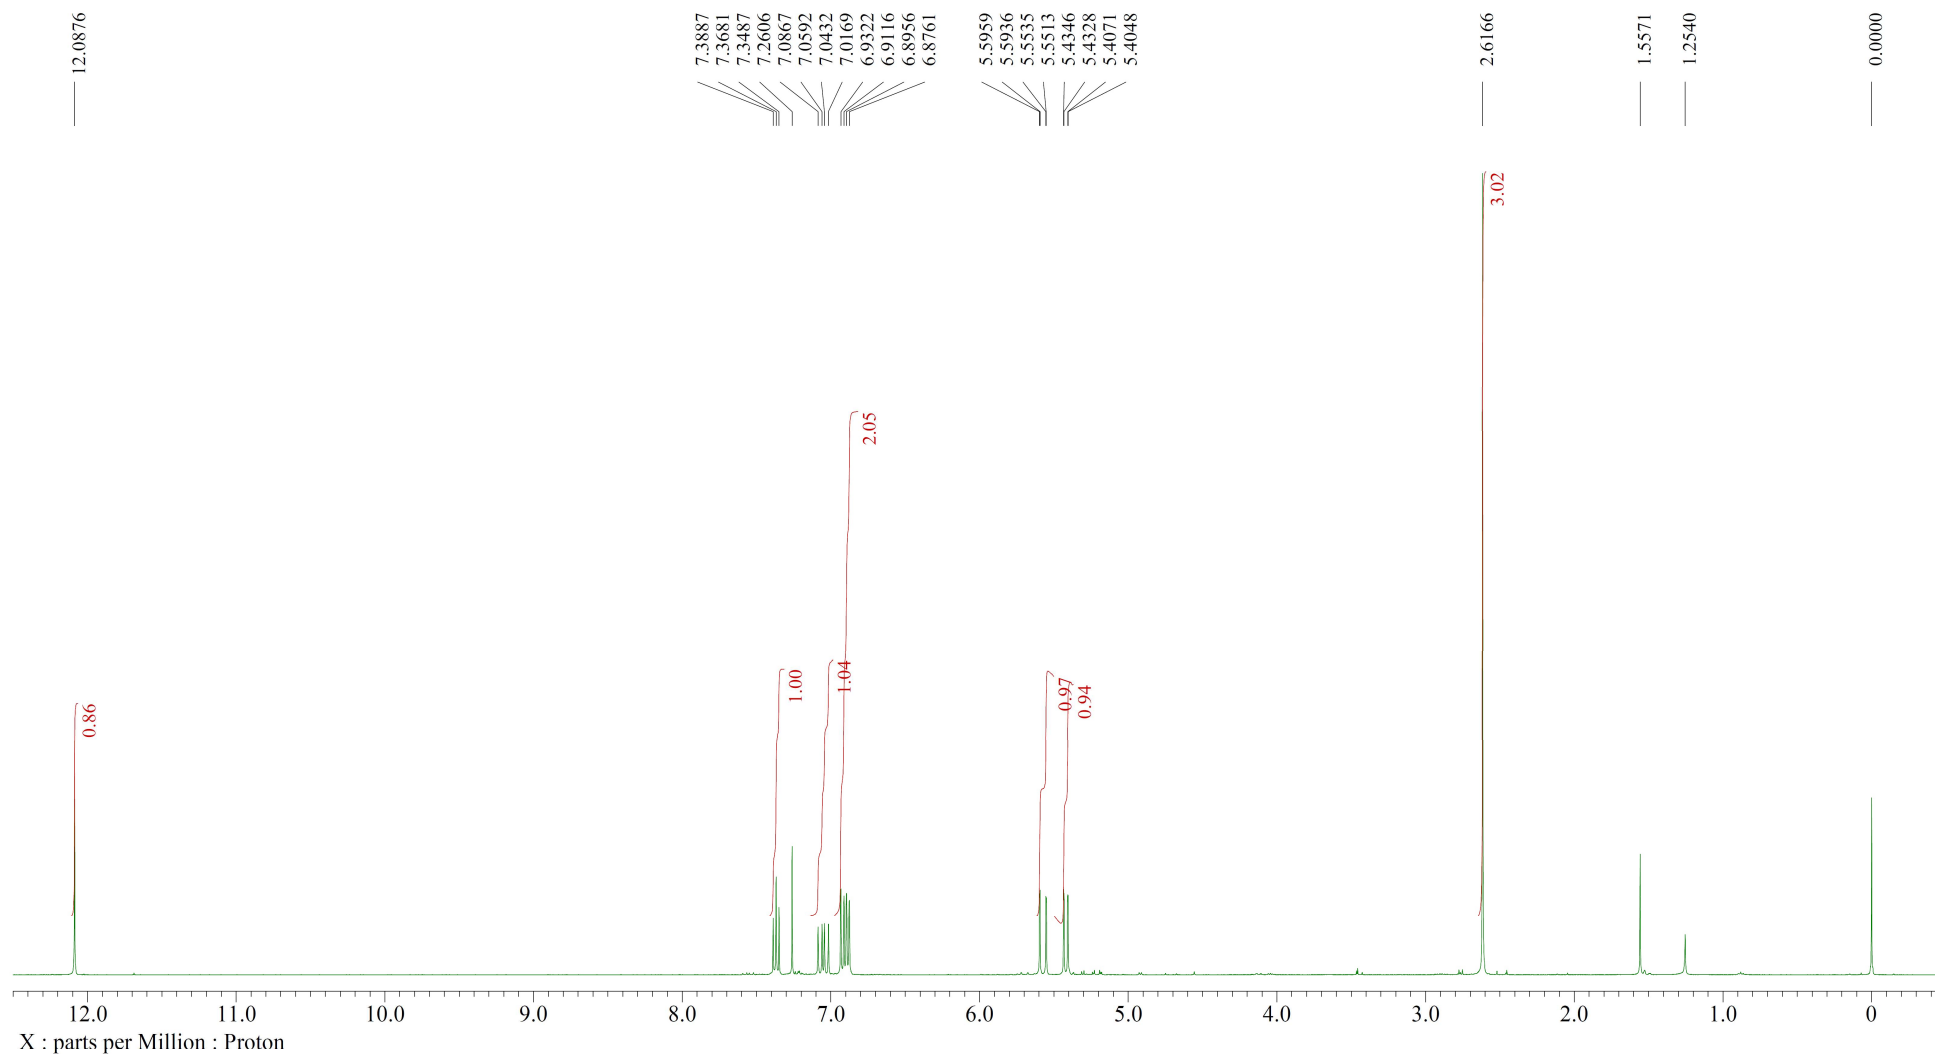

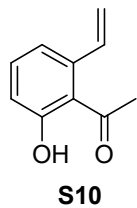

$^{13}\text{C}$ -NMR (100 MHz,  $\text{CDCl}_3$ )

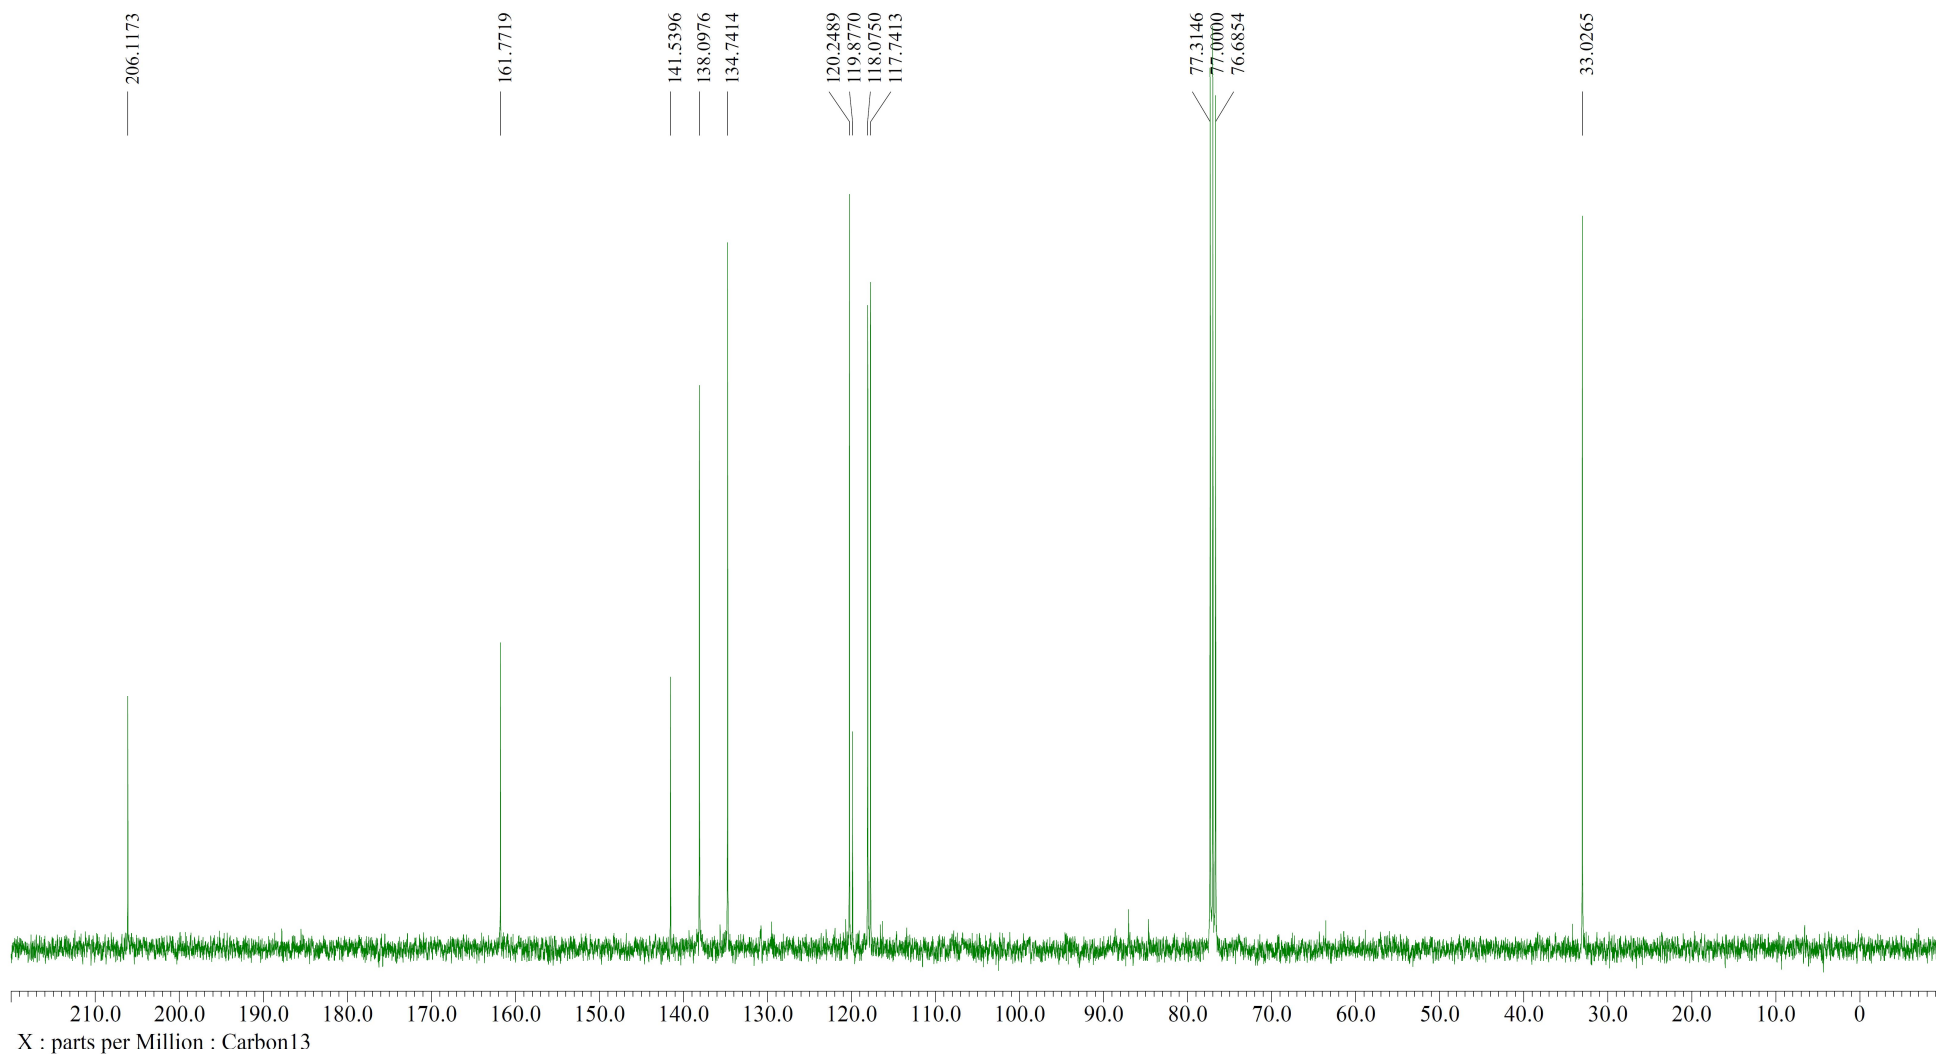

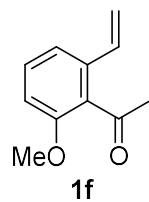

# <sup>1</sup>H-NMR (400 MHz, CDCl<sub>3</sub>)

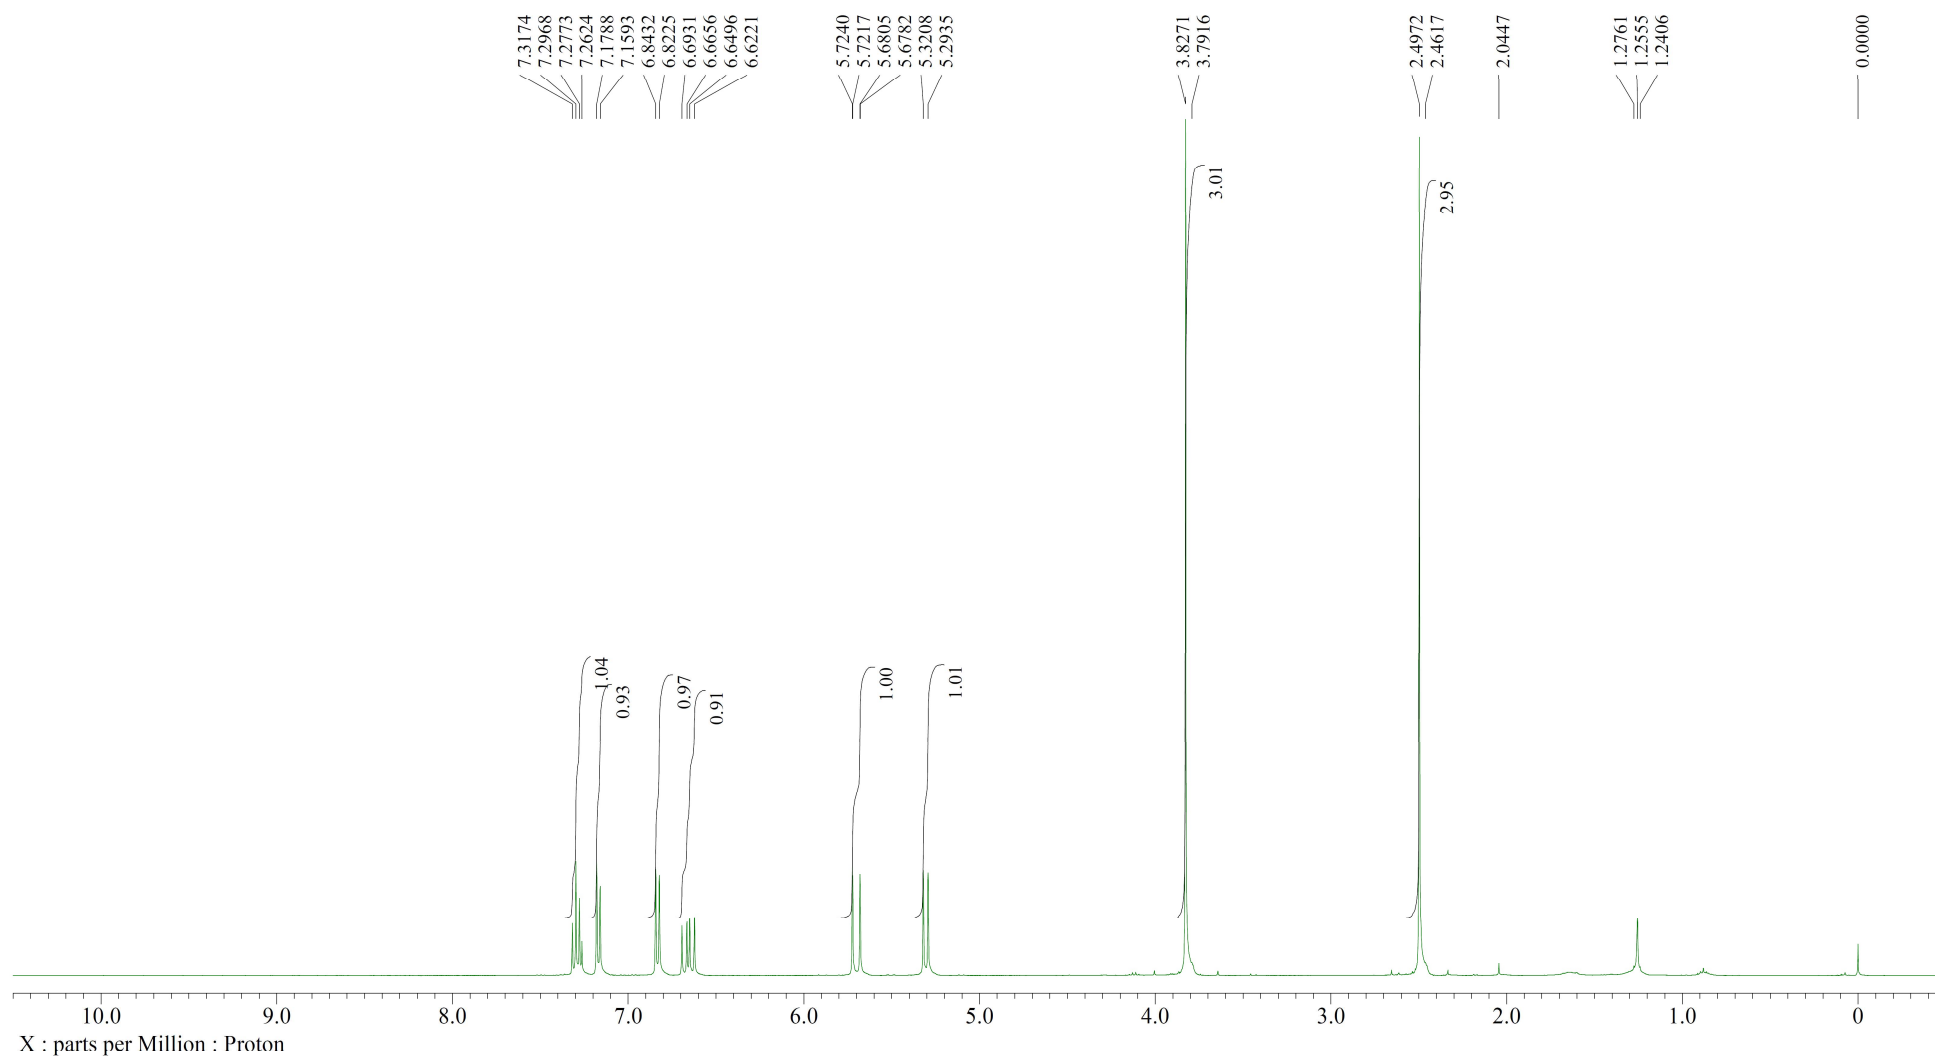



# <sup>13</sup>C-NMR (100 MHz, CDCl<sub>3</sub>)

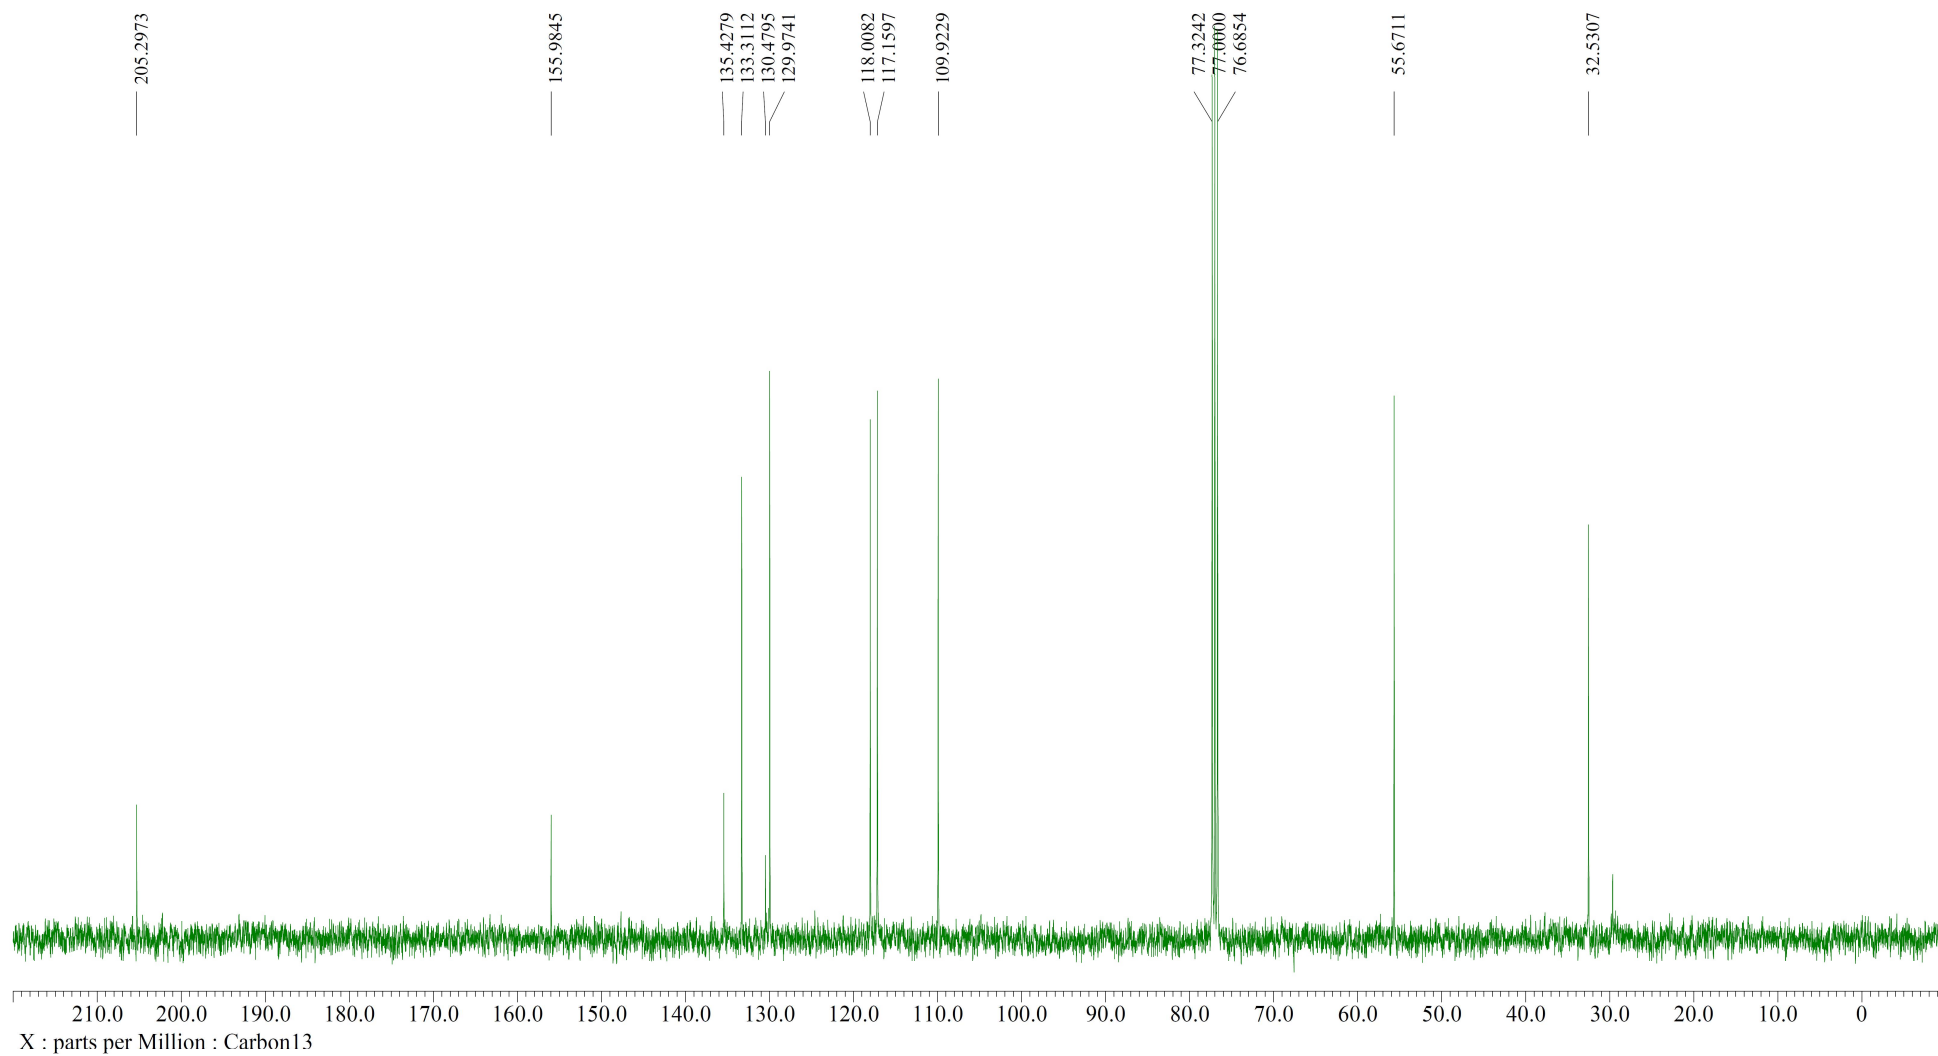

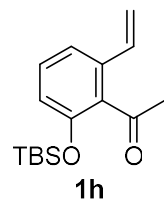

<sup>1</sup>H-NMR (400 MHz, CDCl<sub>3</sub>)

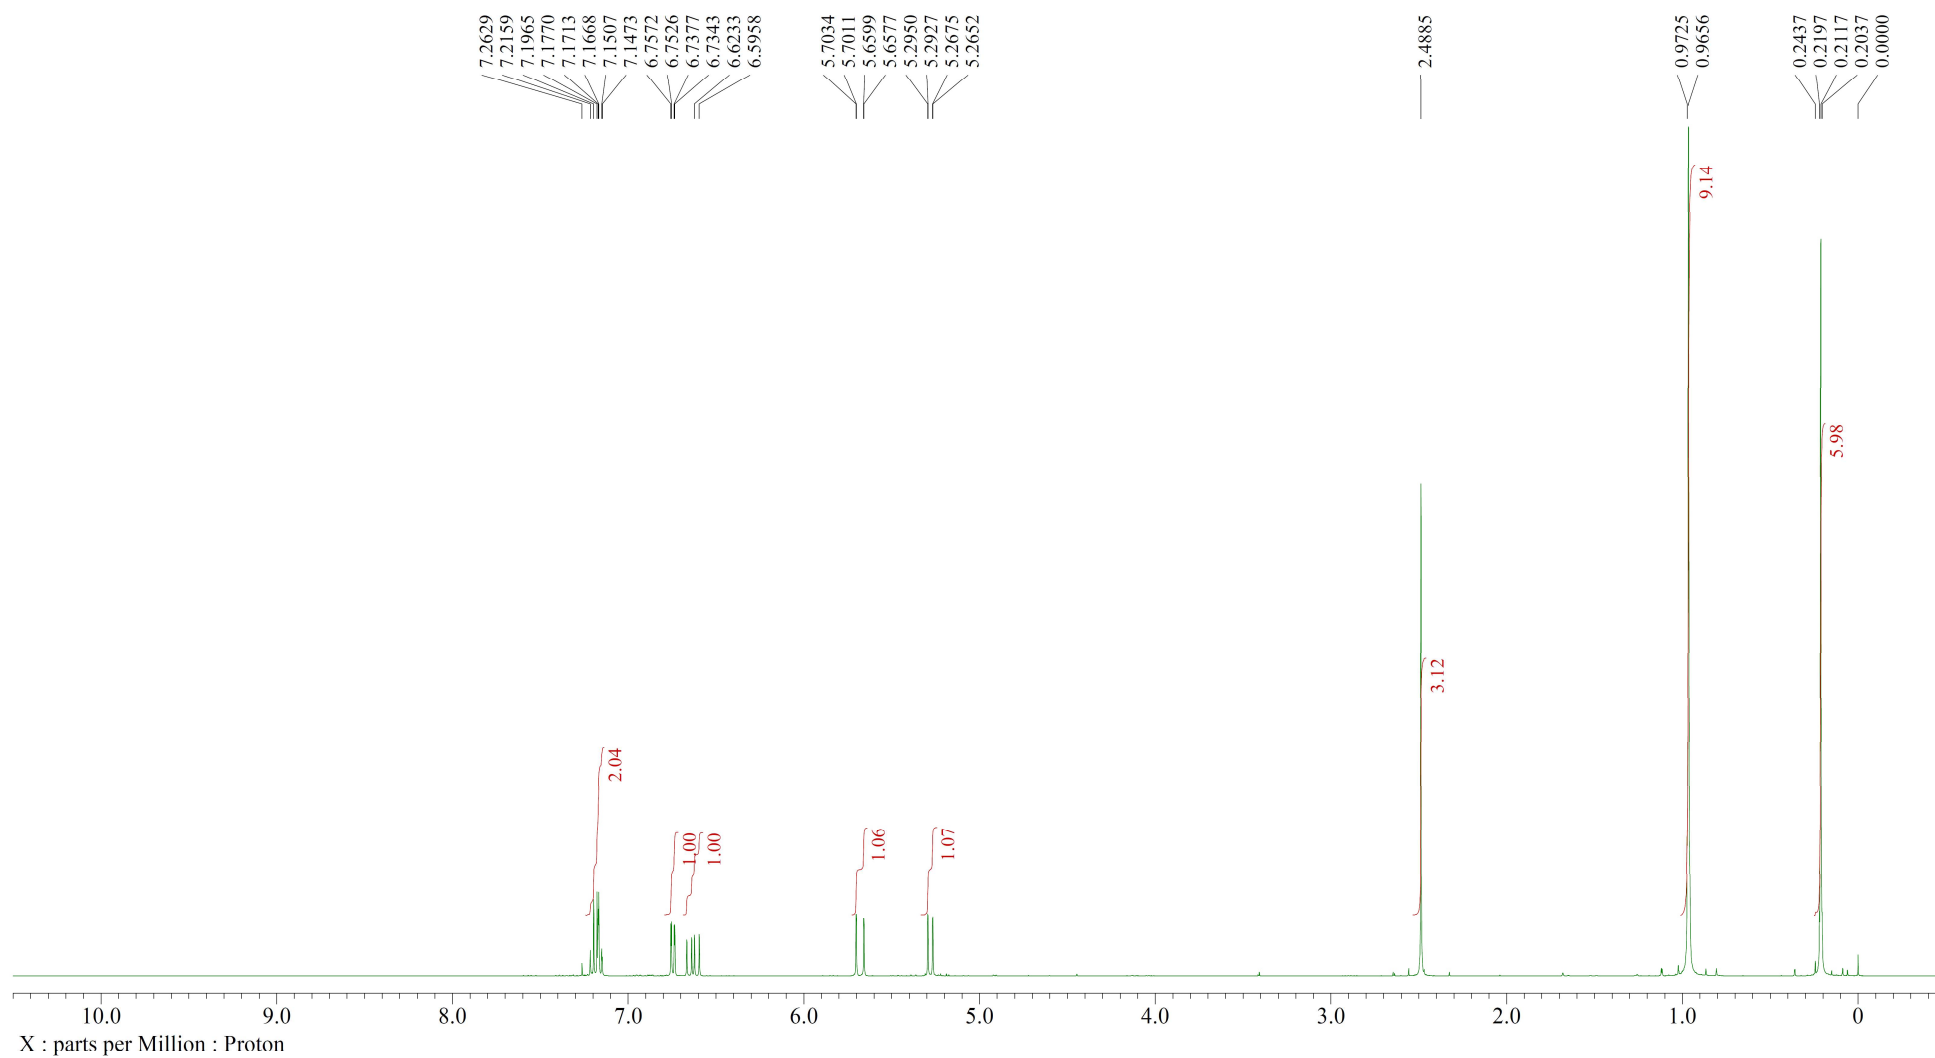



$^{13}\text{C}$ -NMR (100 MHz,  $\text{CDCl}_3$ )

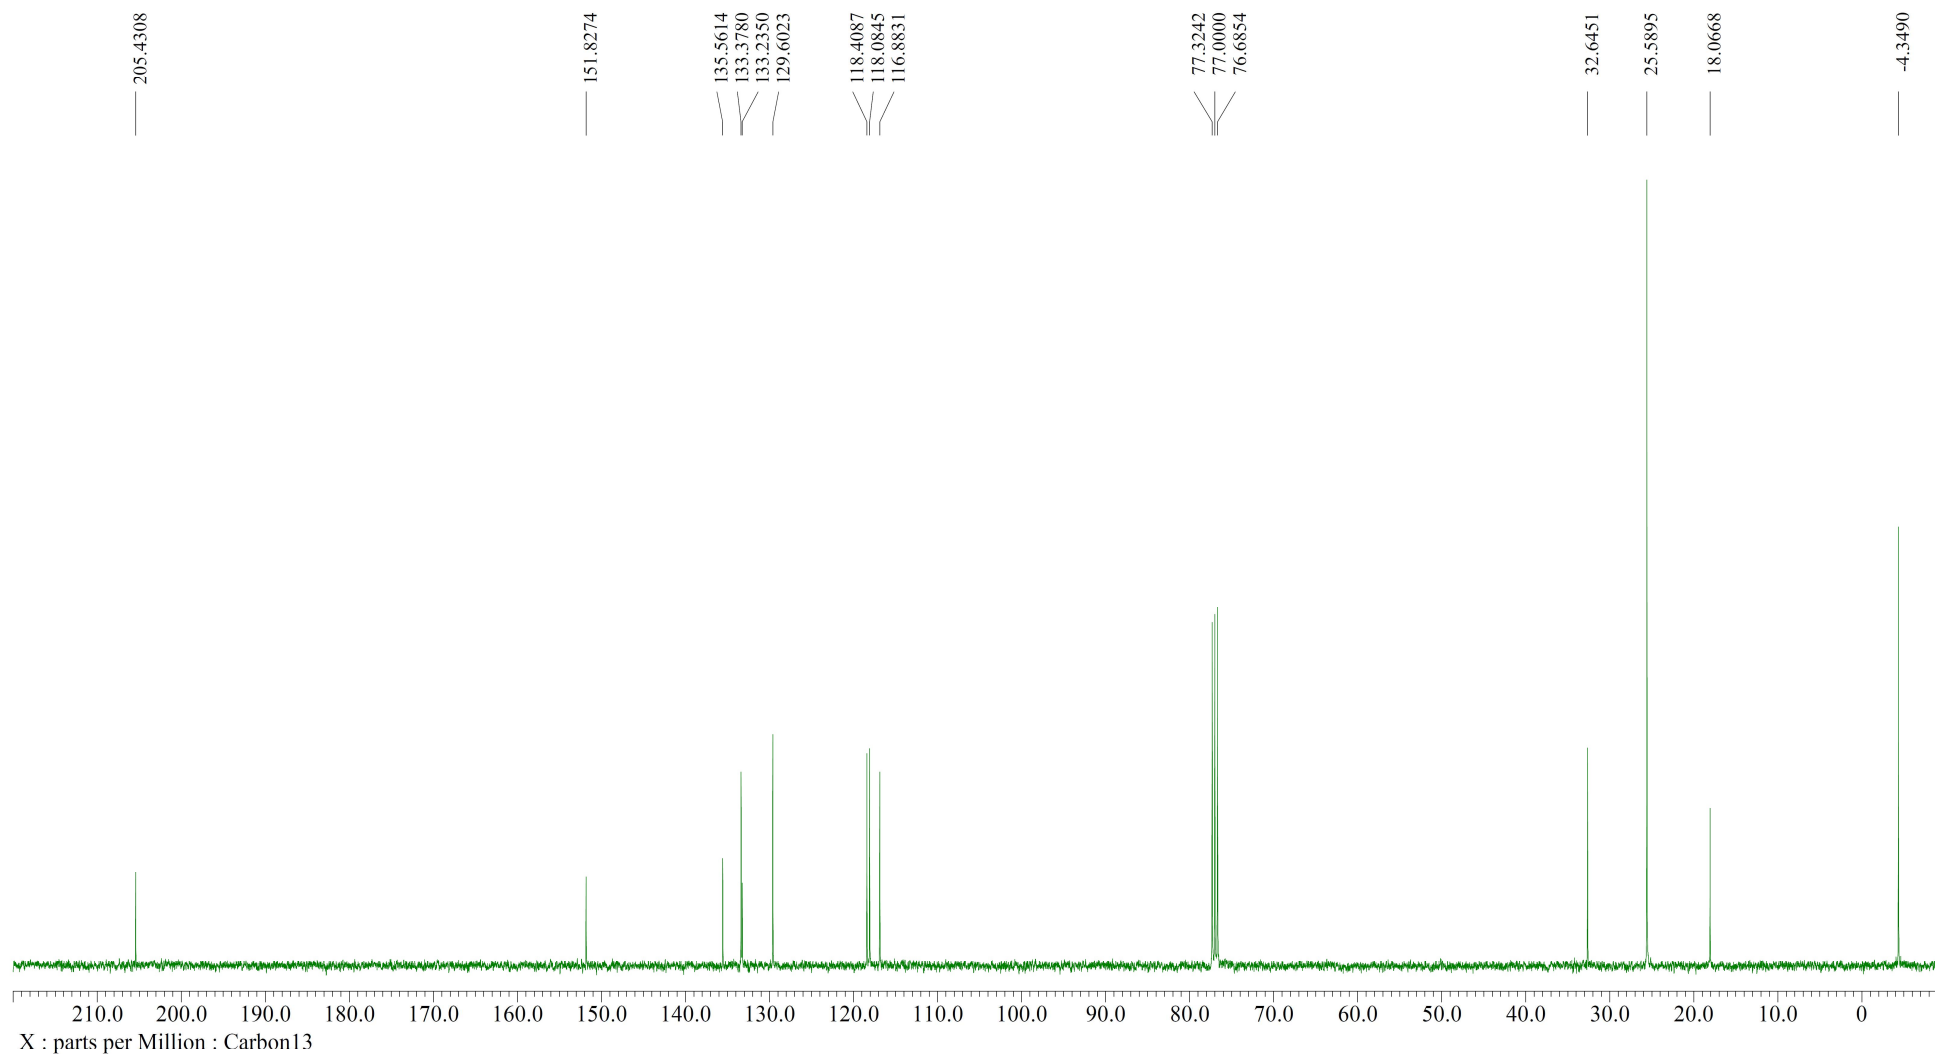

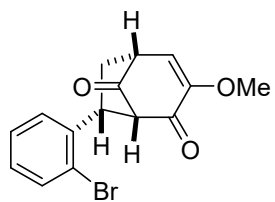

**3a**

$^1\text{H-NMR}$  (400 MHz,  $\text{CDCl}_3$ )

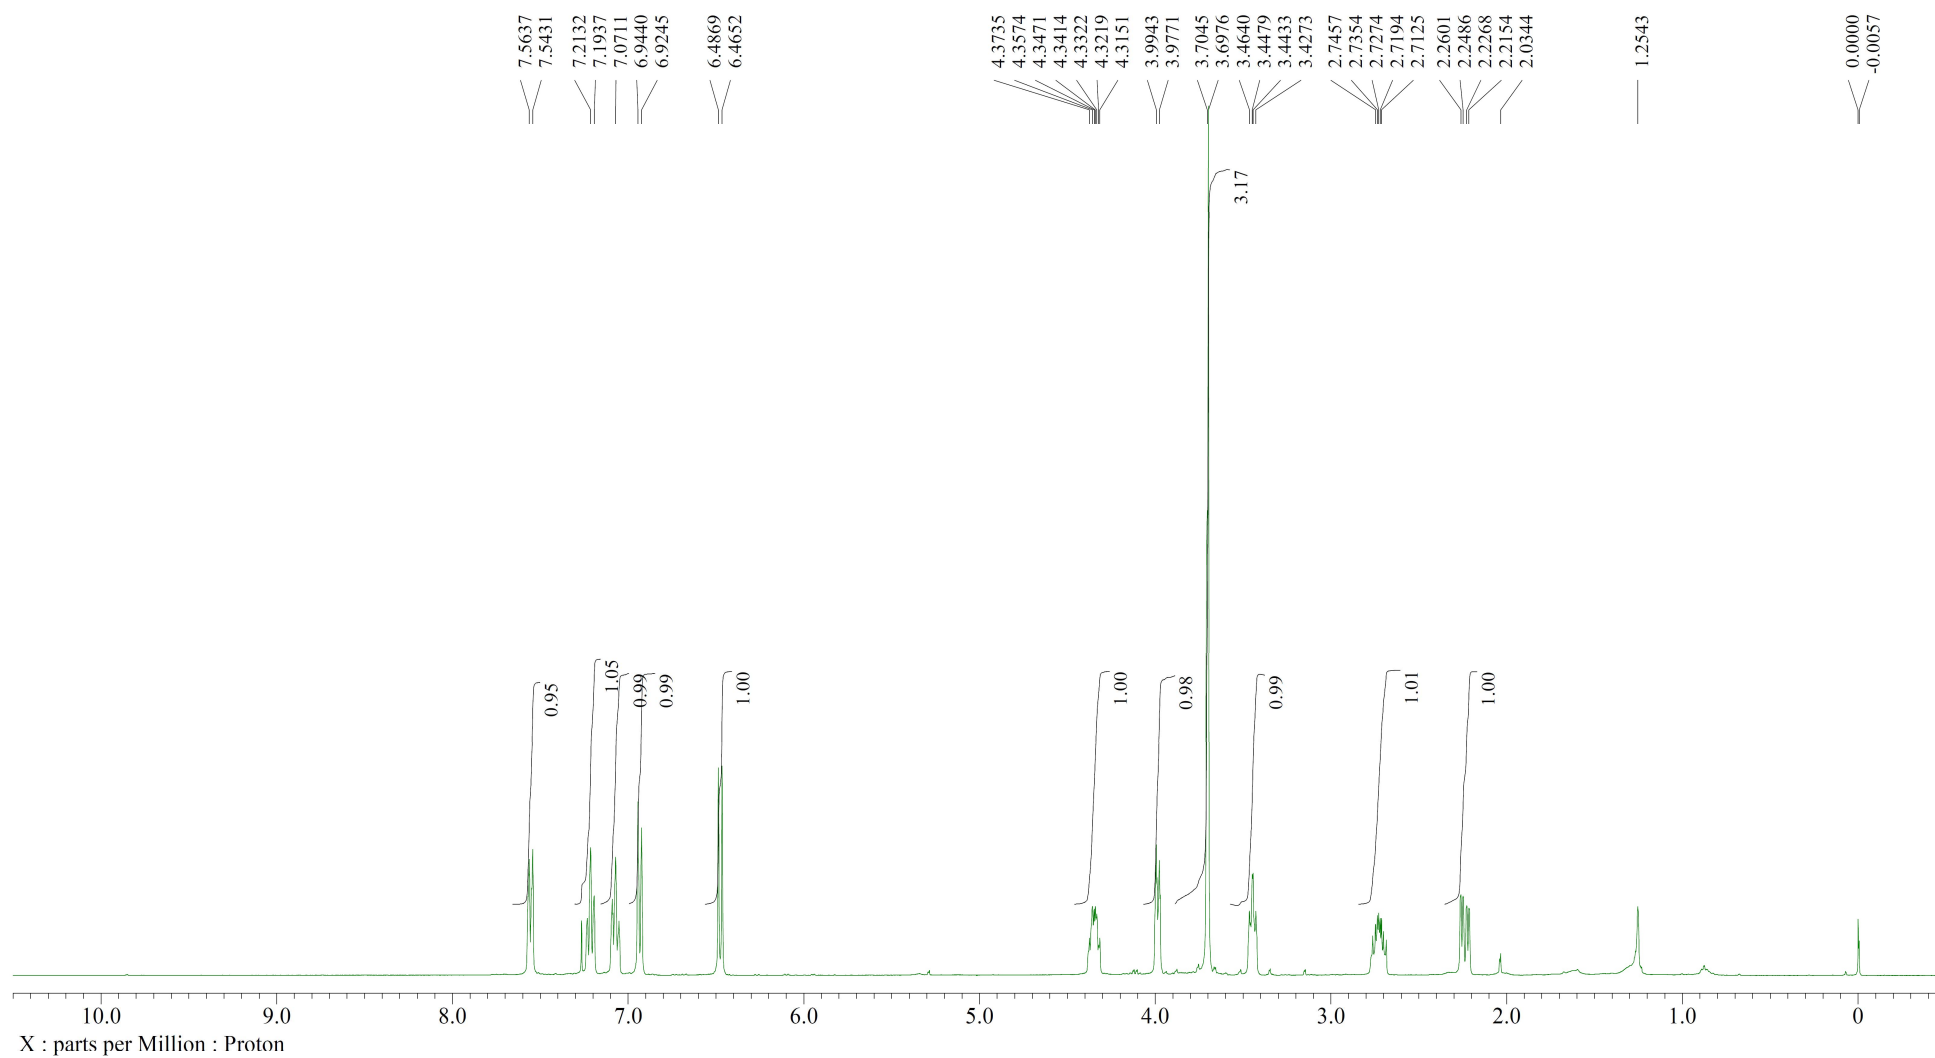



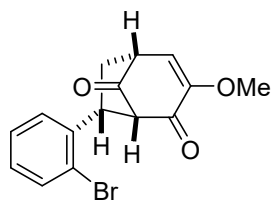

**3a**

$^{13}\text{C}$ -NMR (100 MHz,  $\text{CDCl}_3$ )

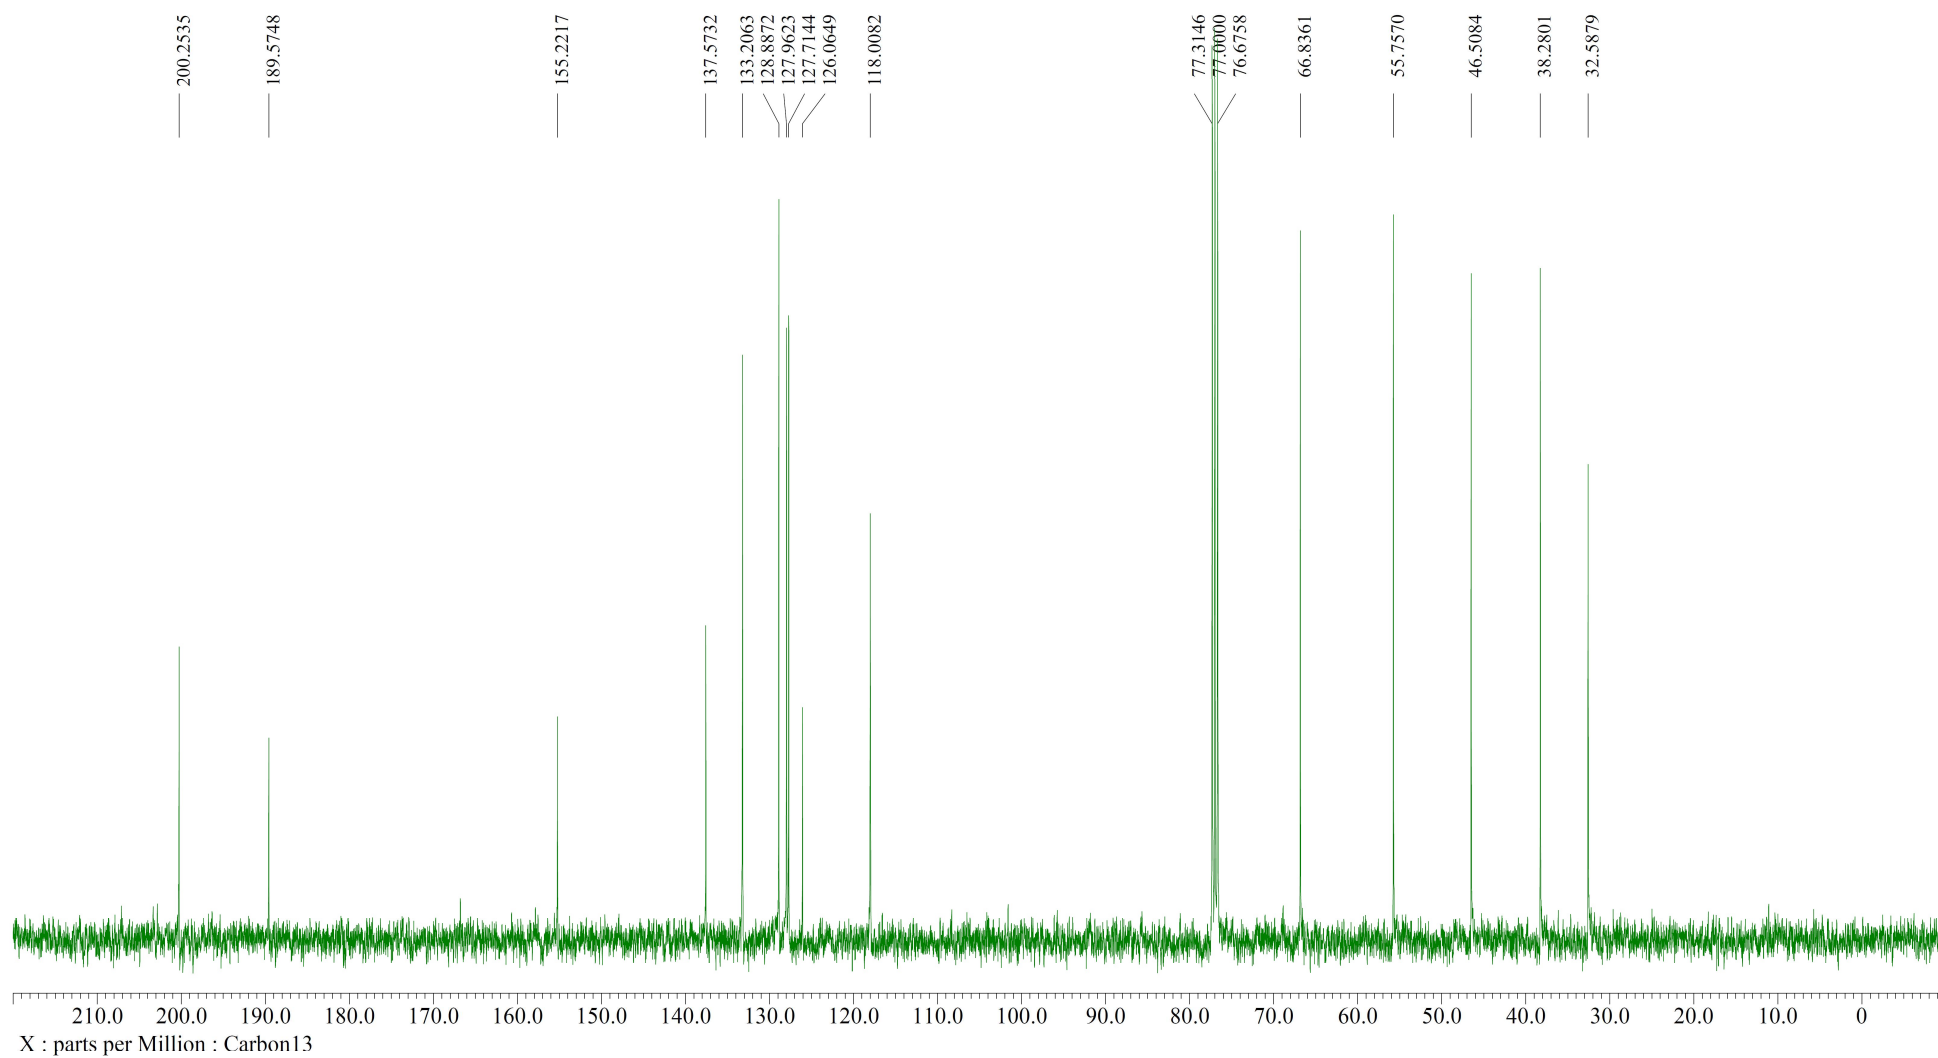

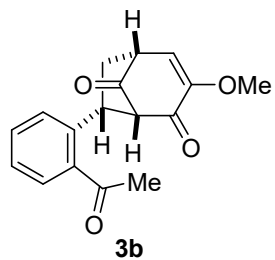

# <sup>1</sup>H-NMR (400 MHz, CDCl<sub>3</sub>)

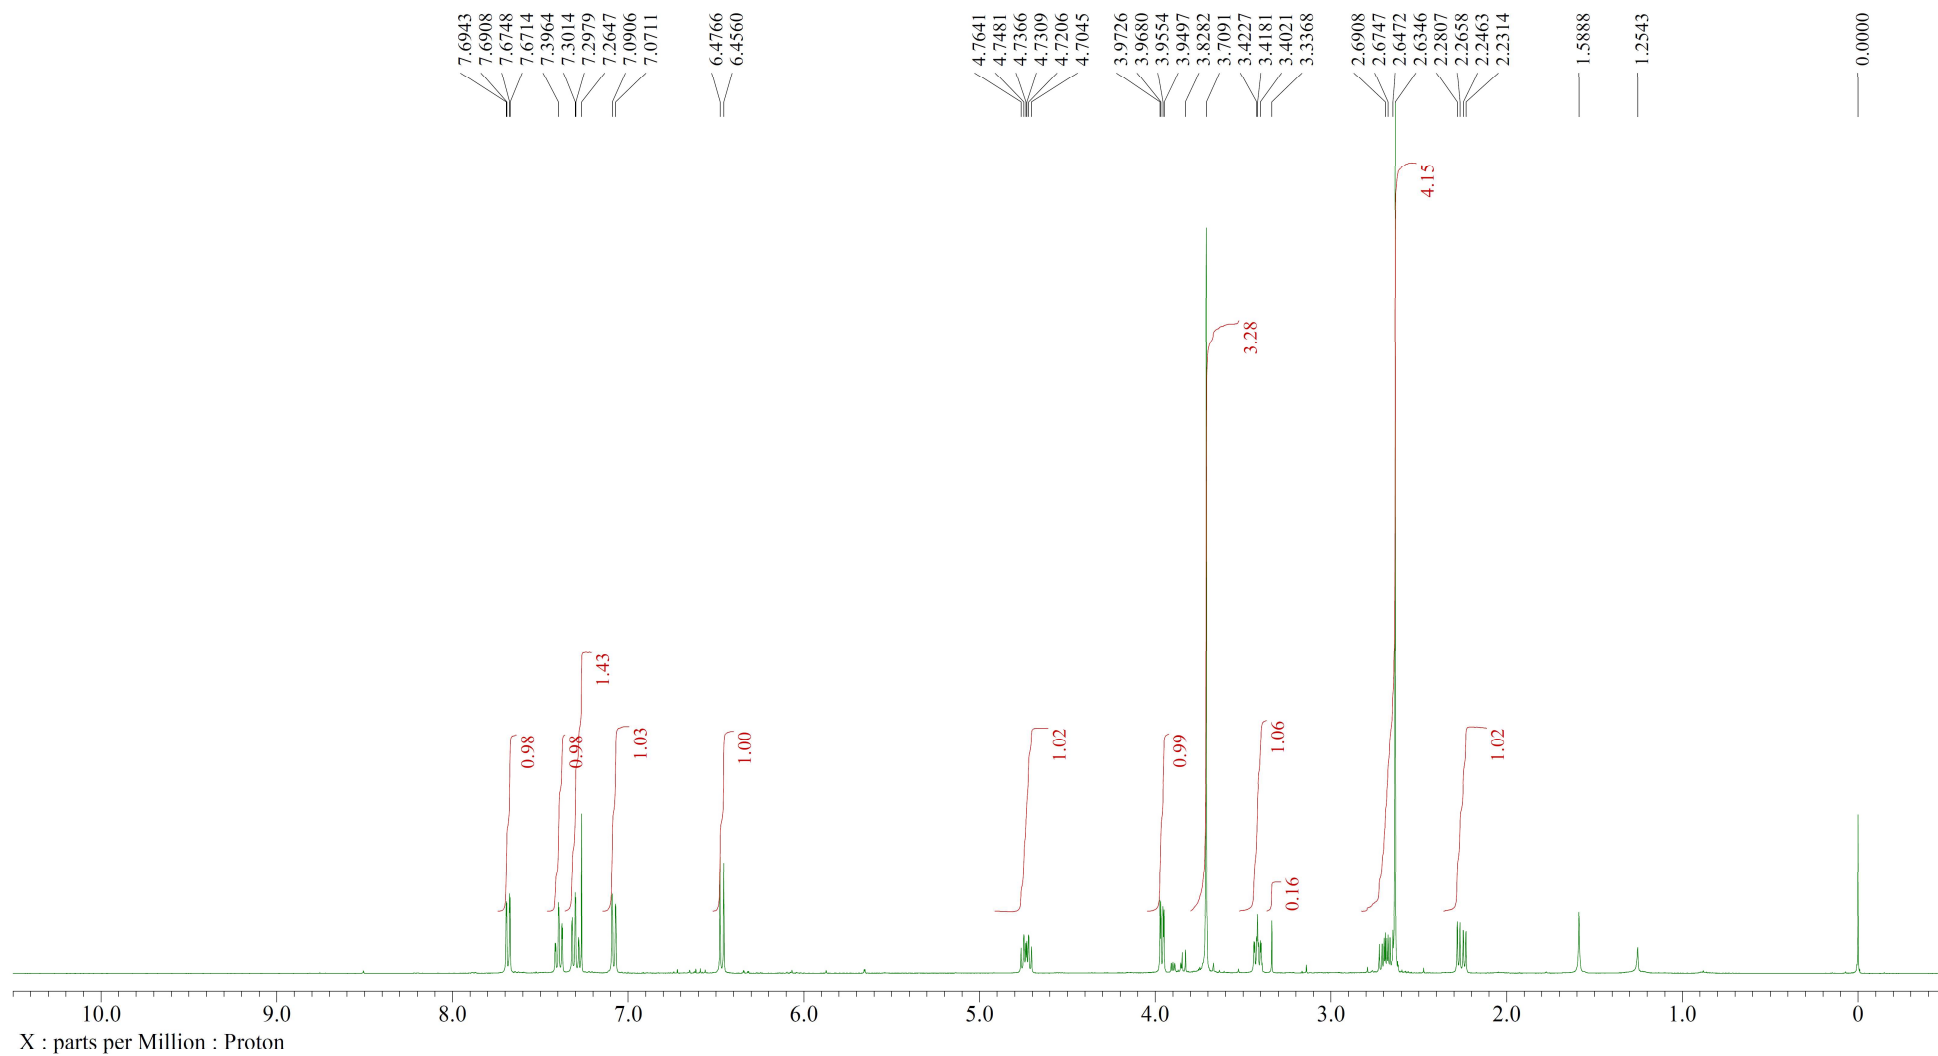

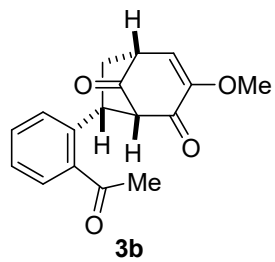

$^{13}\text{C-NMR}$  (100 MHz,  $\text{CDCl}_3$ )

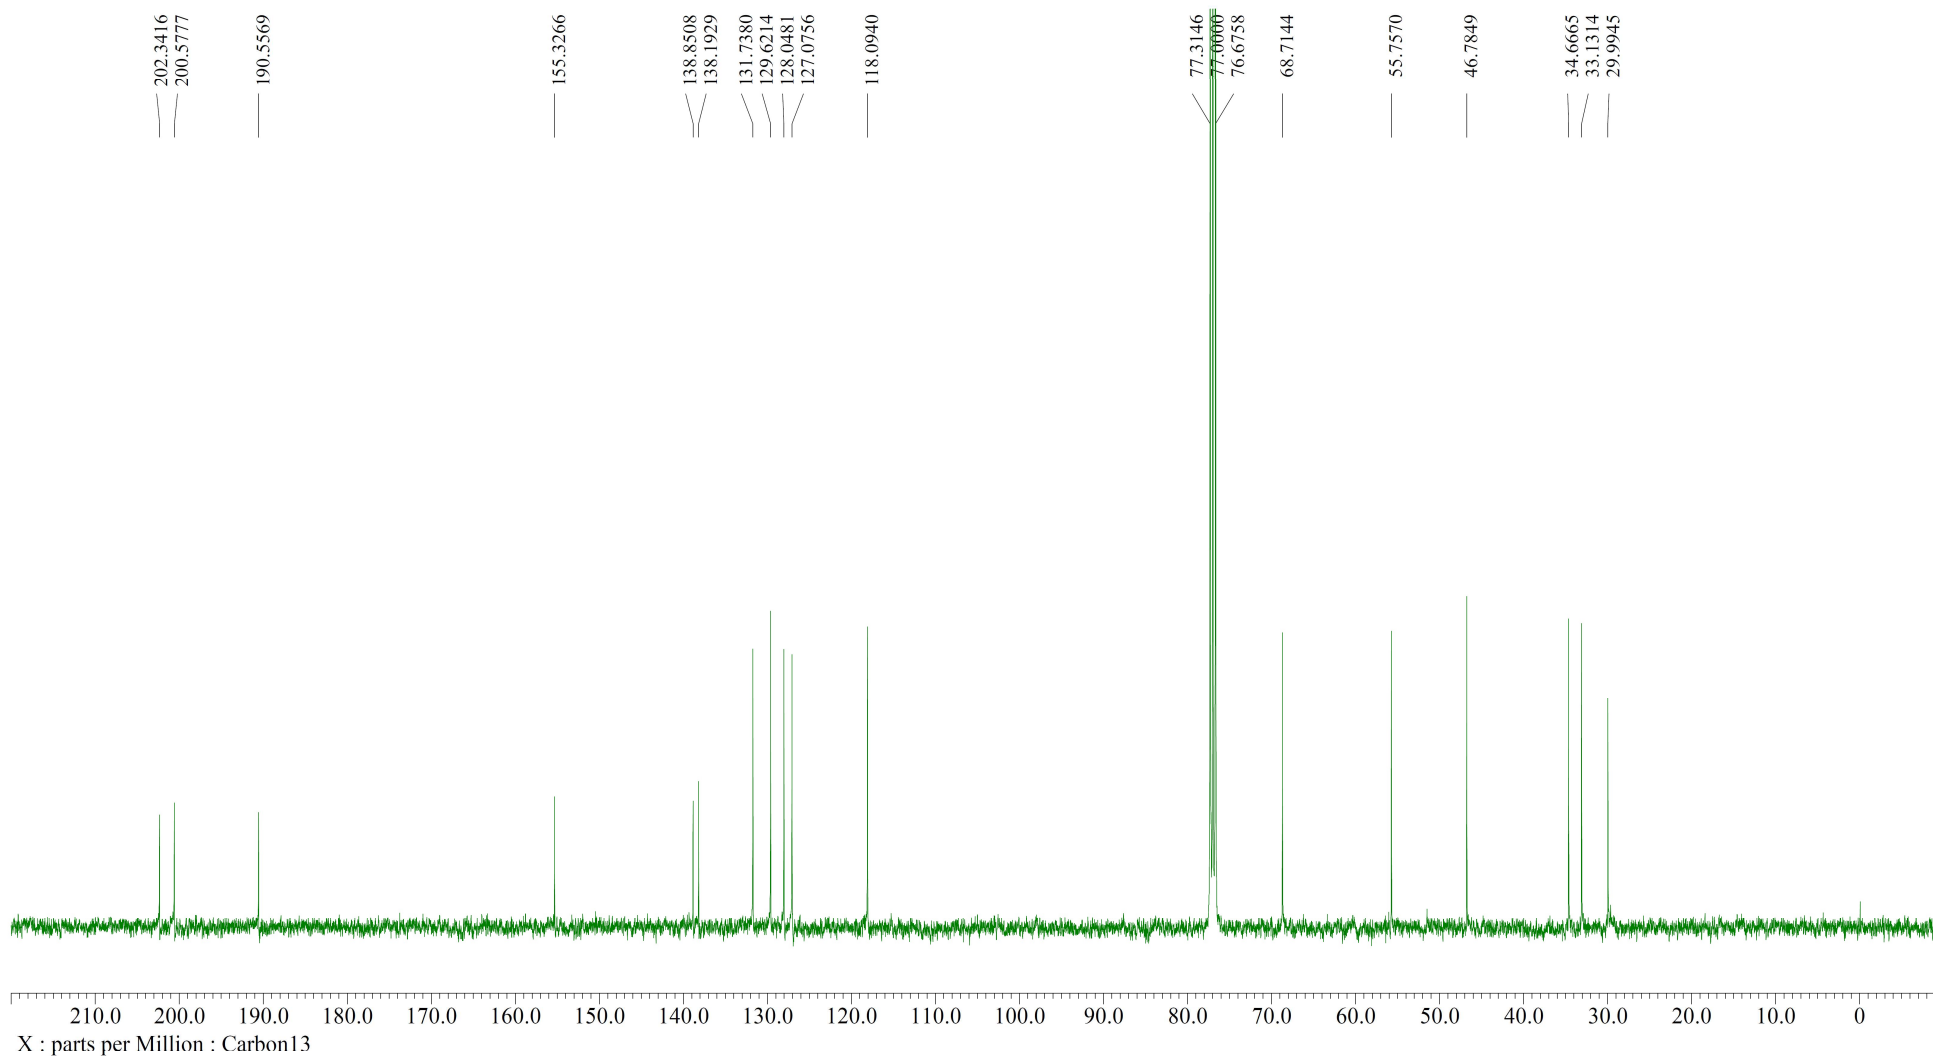

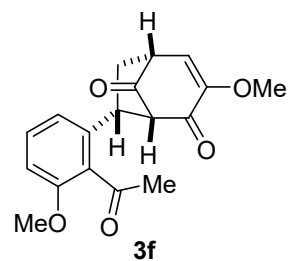

# <sup>1</sup>H-NMR (400 MHz, CDCl<sub>3</sub>)

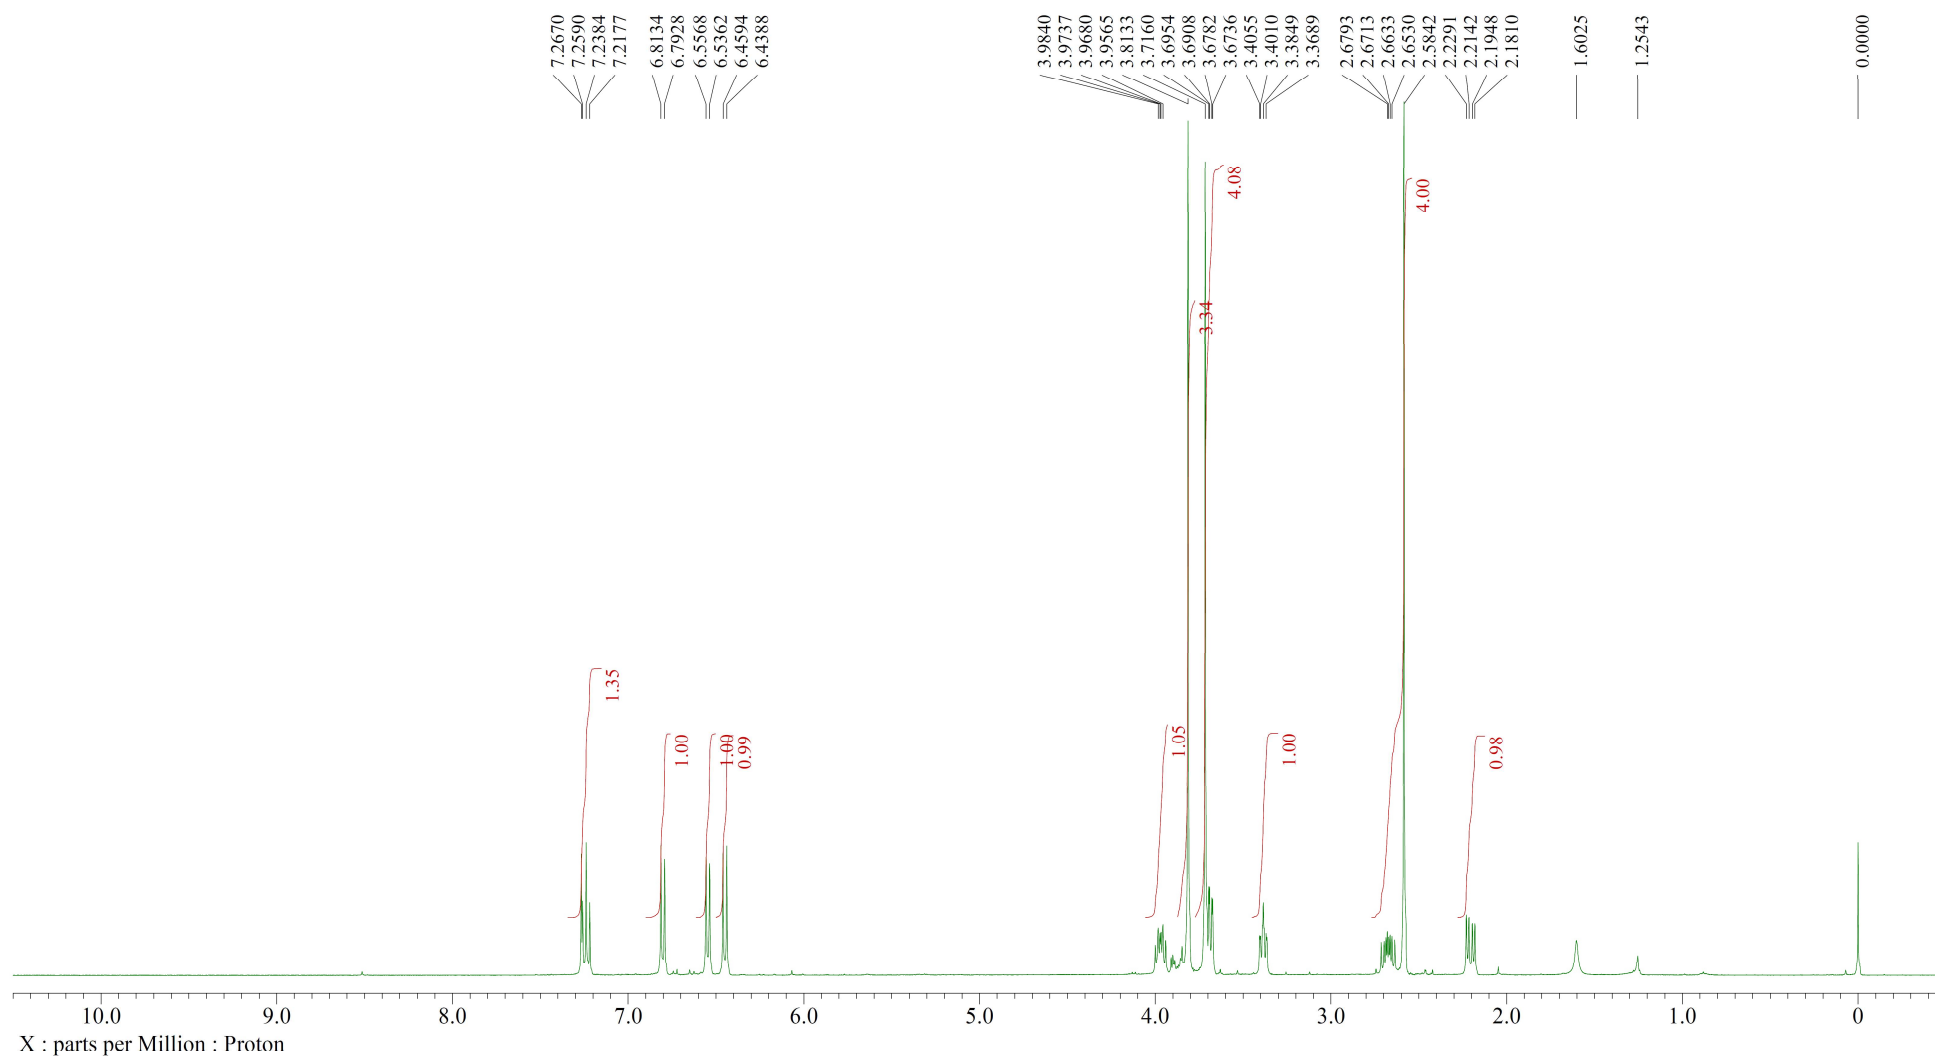

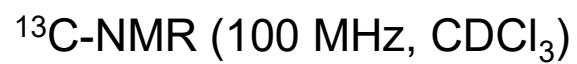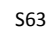

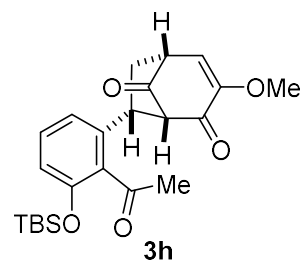

# <sup>1</sup>H-NMR (400 MHz, CDCl<sub>3</sub>)

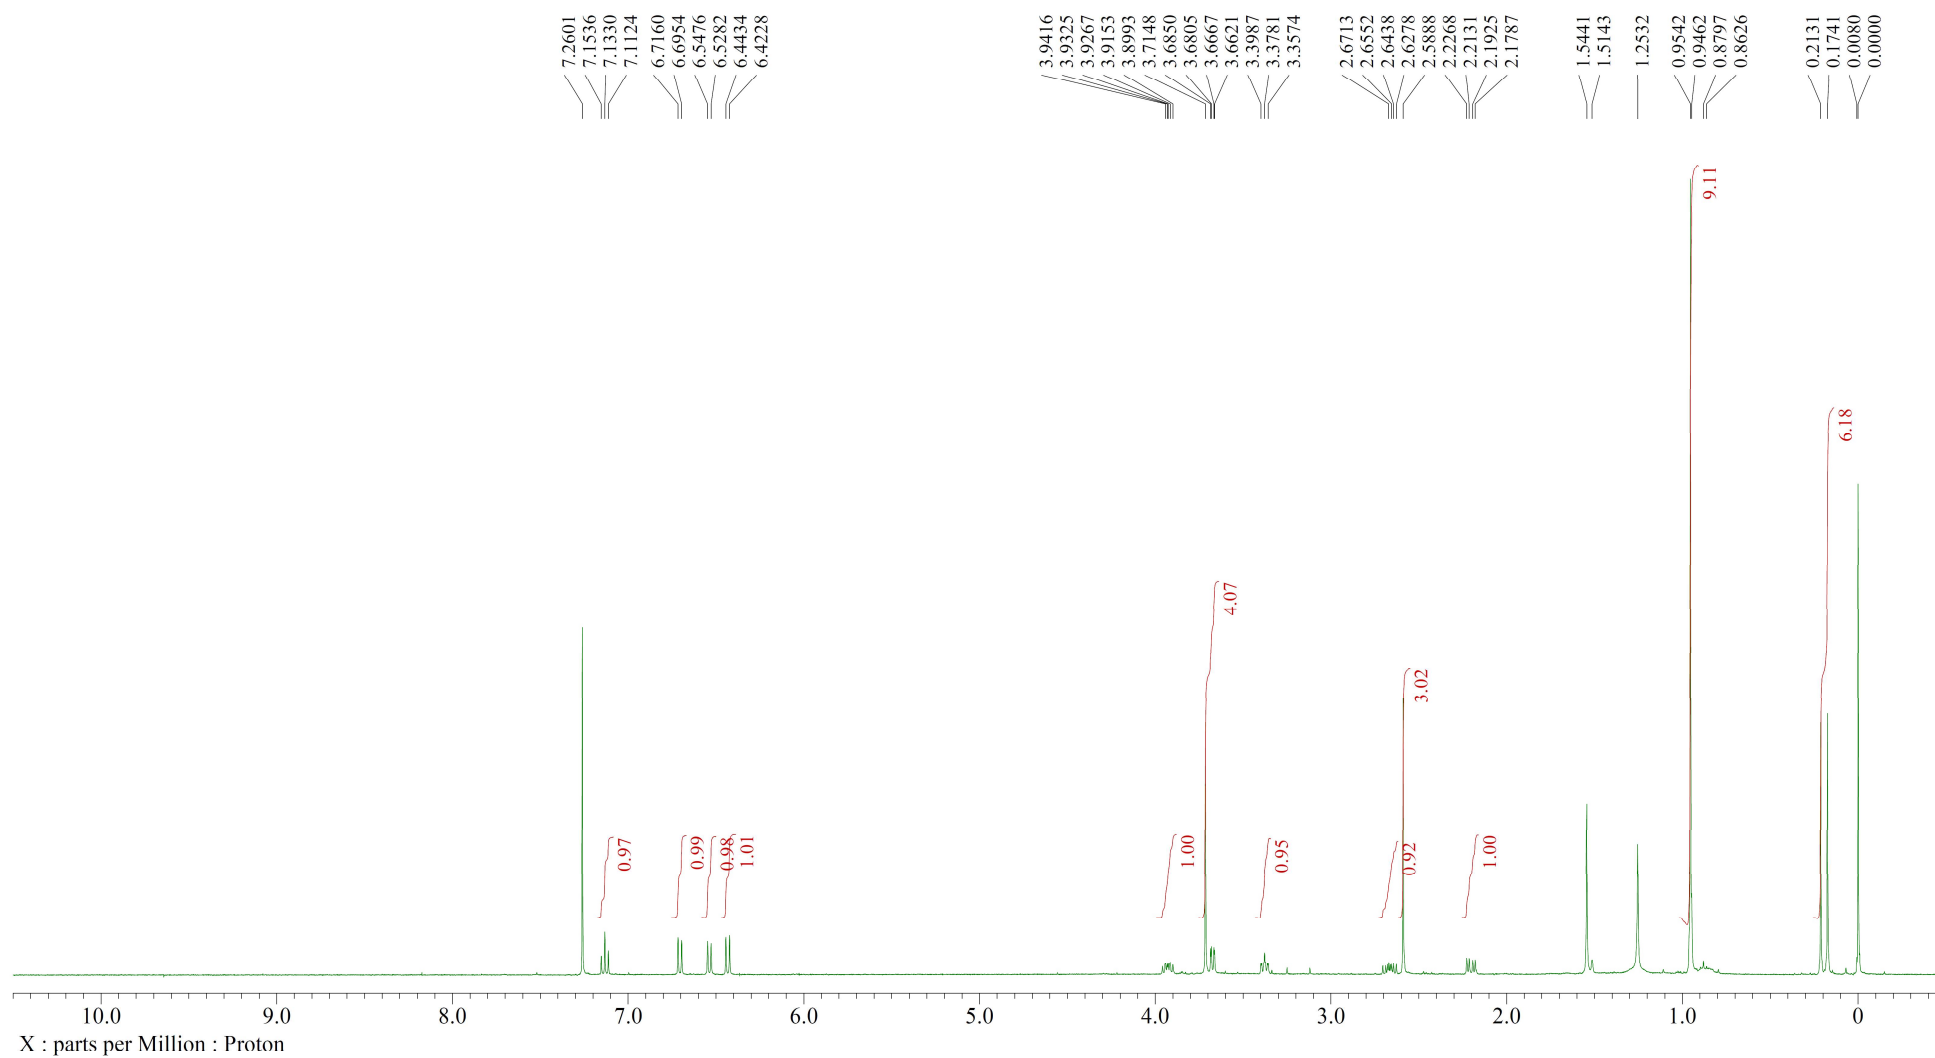

<sup>13</sup>C-NMR (100 MHz, CDCl<sub>3</sub>)

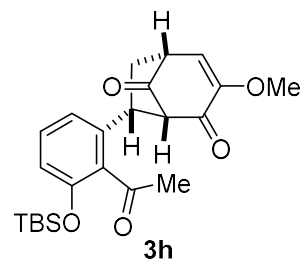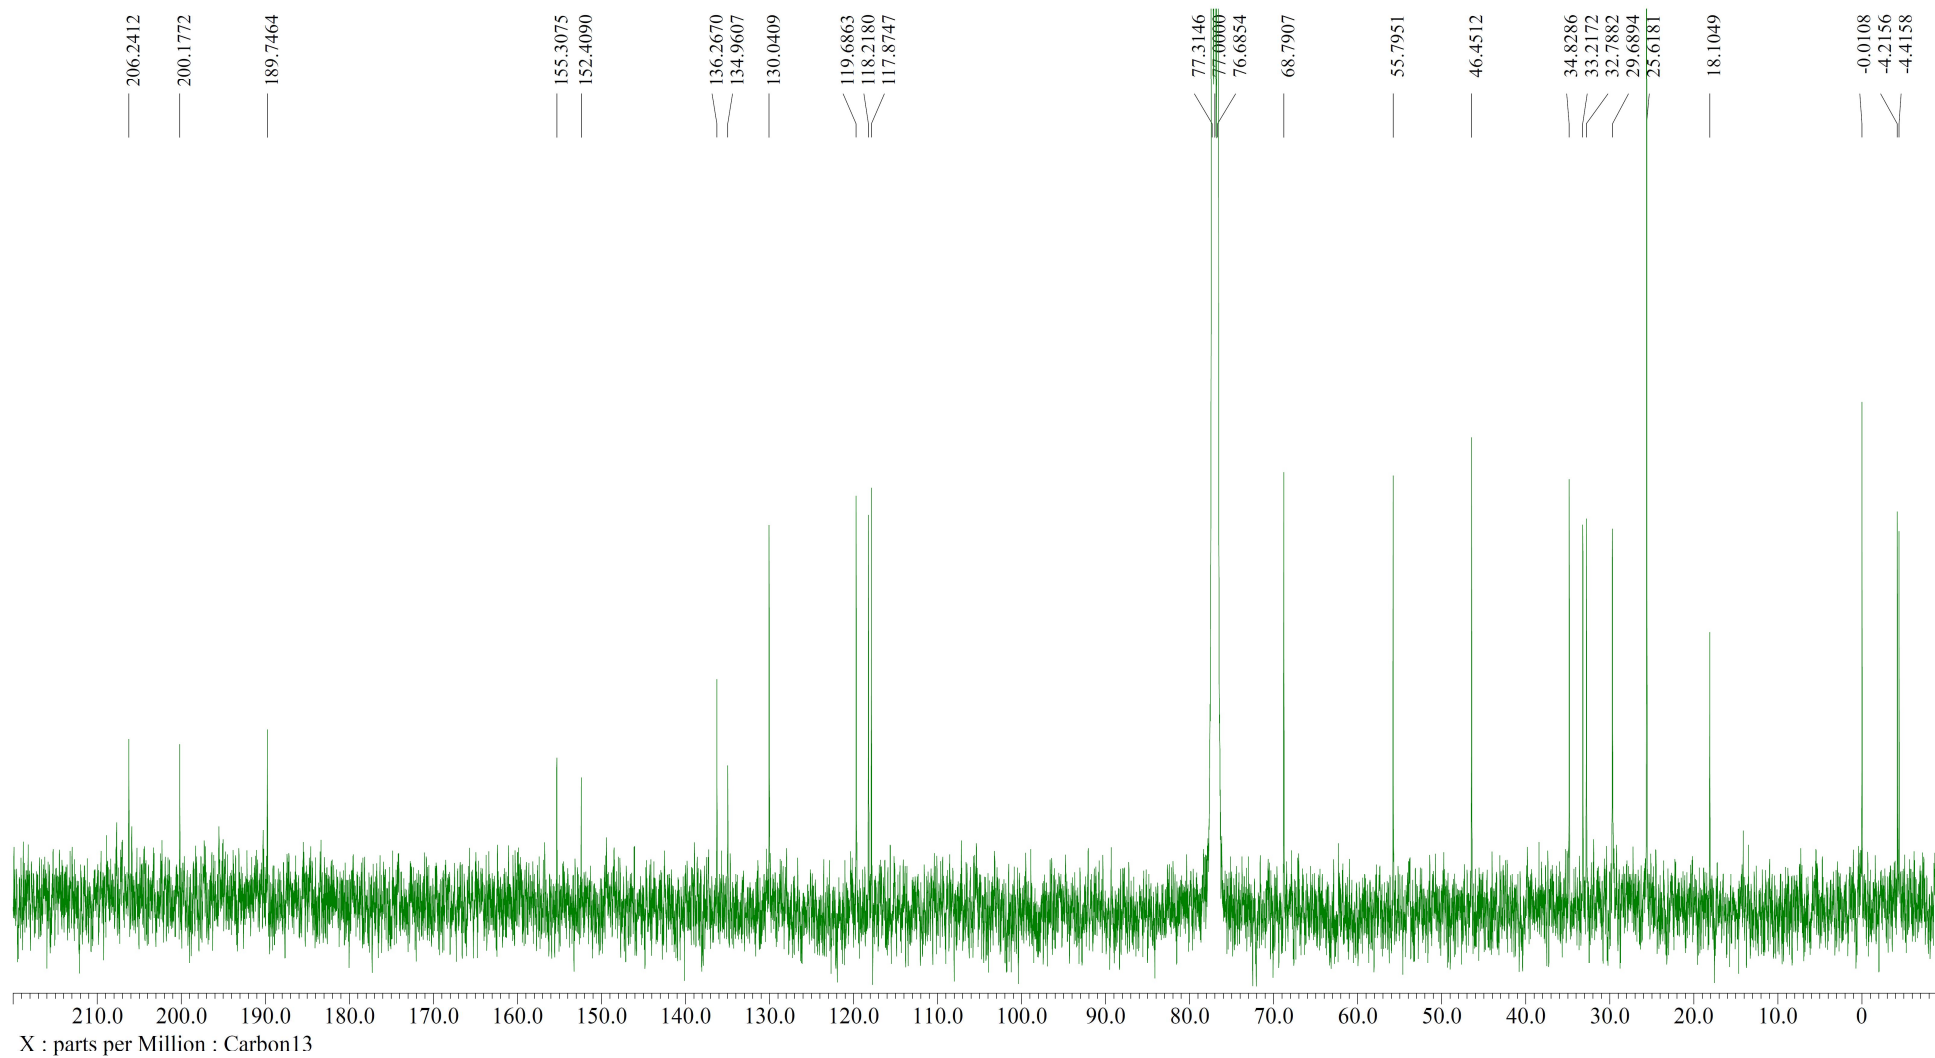

# <sup>1</sup>H-NMR (400 MHz, CDCl<sub>3</sub>)

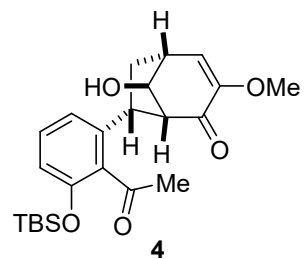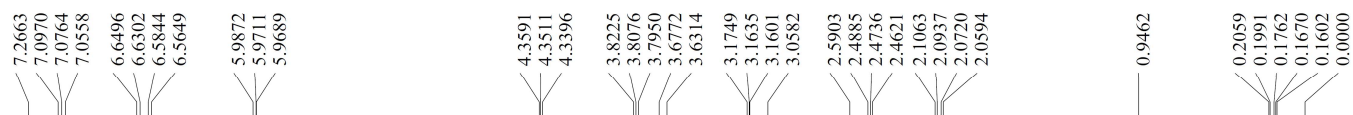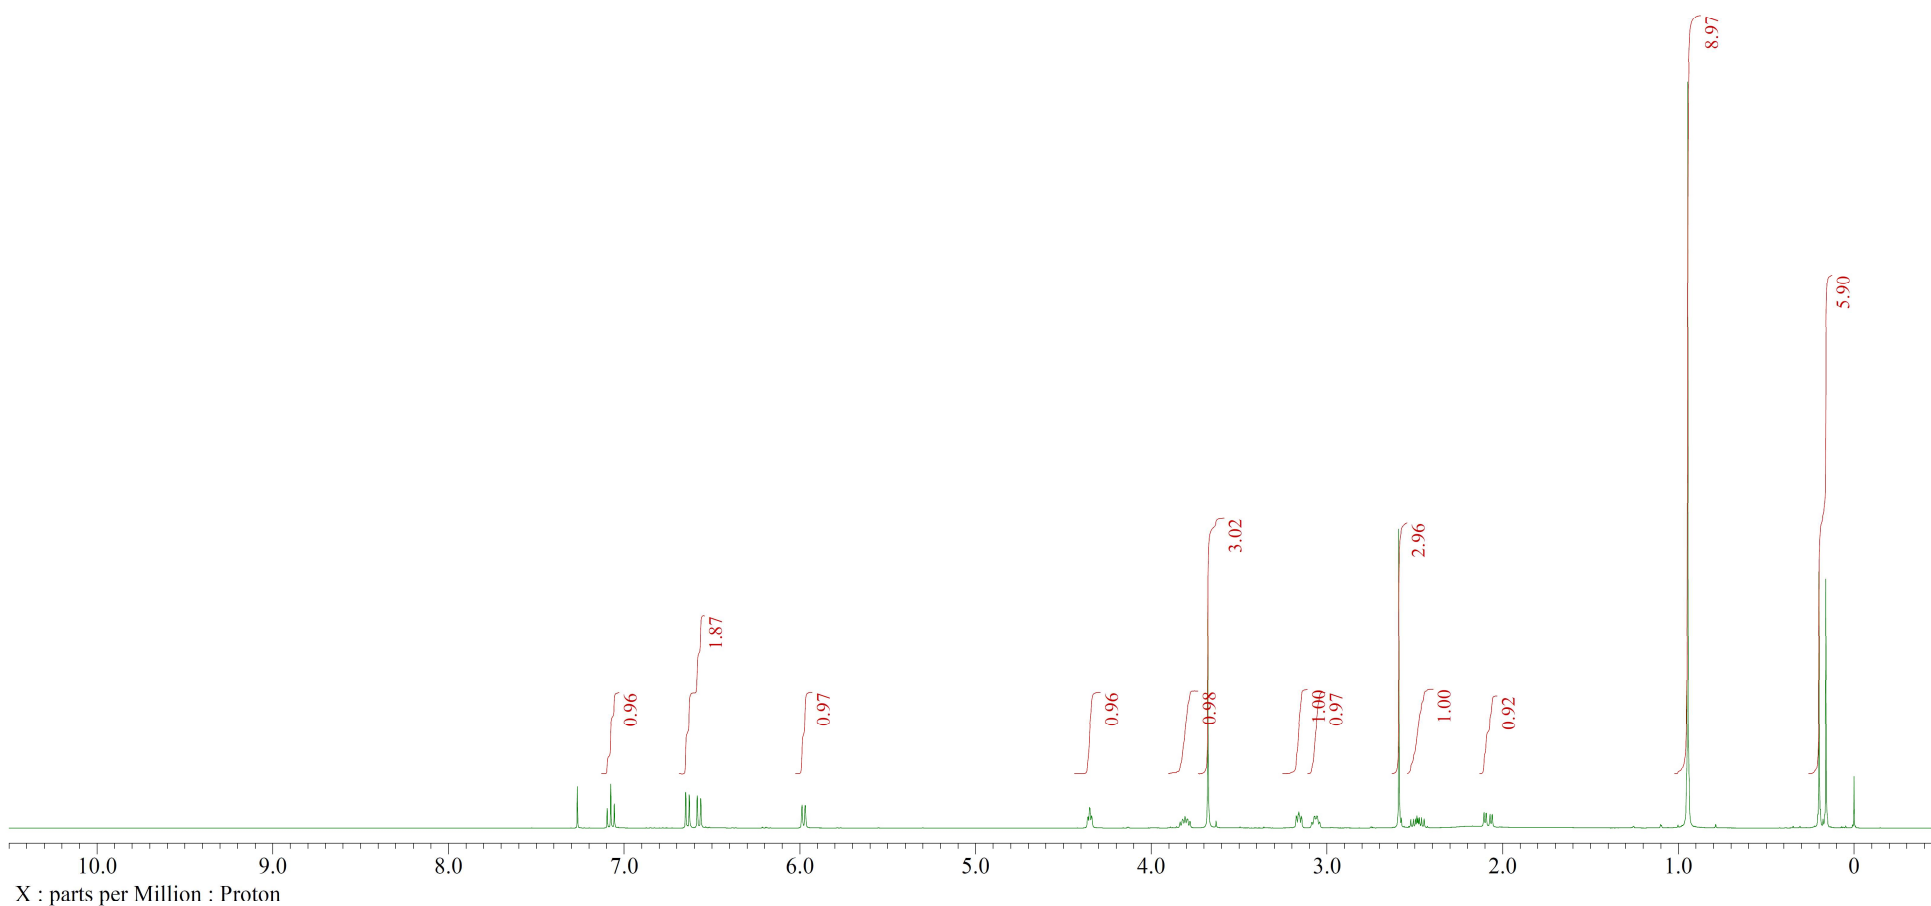



<sup>13</sup>C-NMR (100 MHz, CDCl<sub>3</sub>)

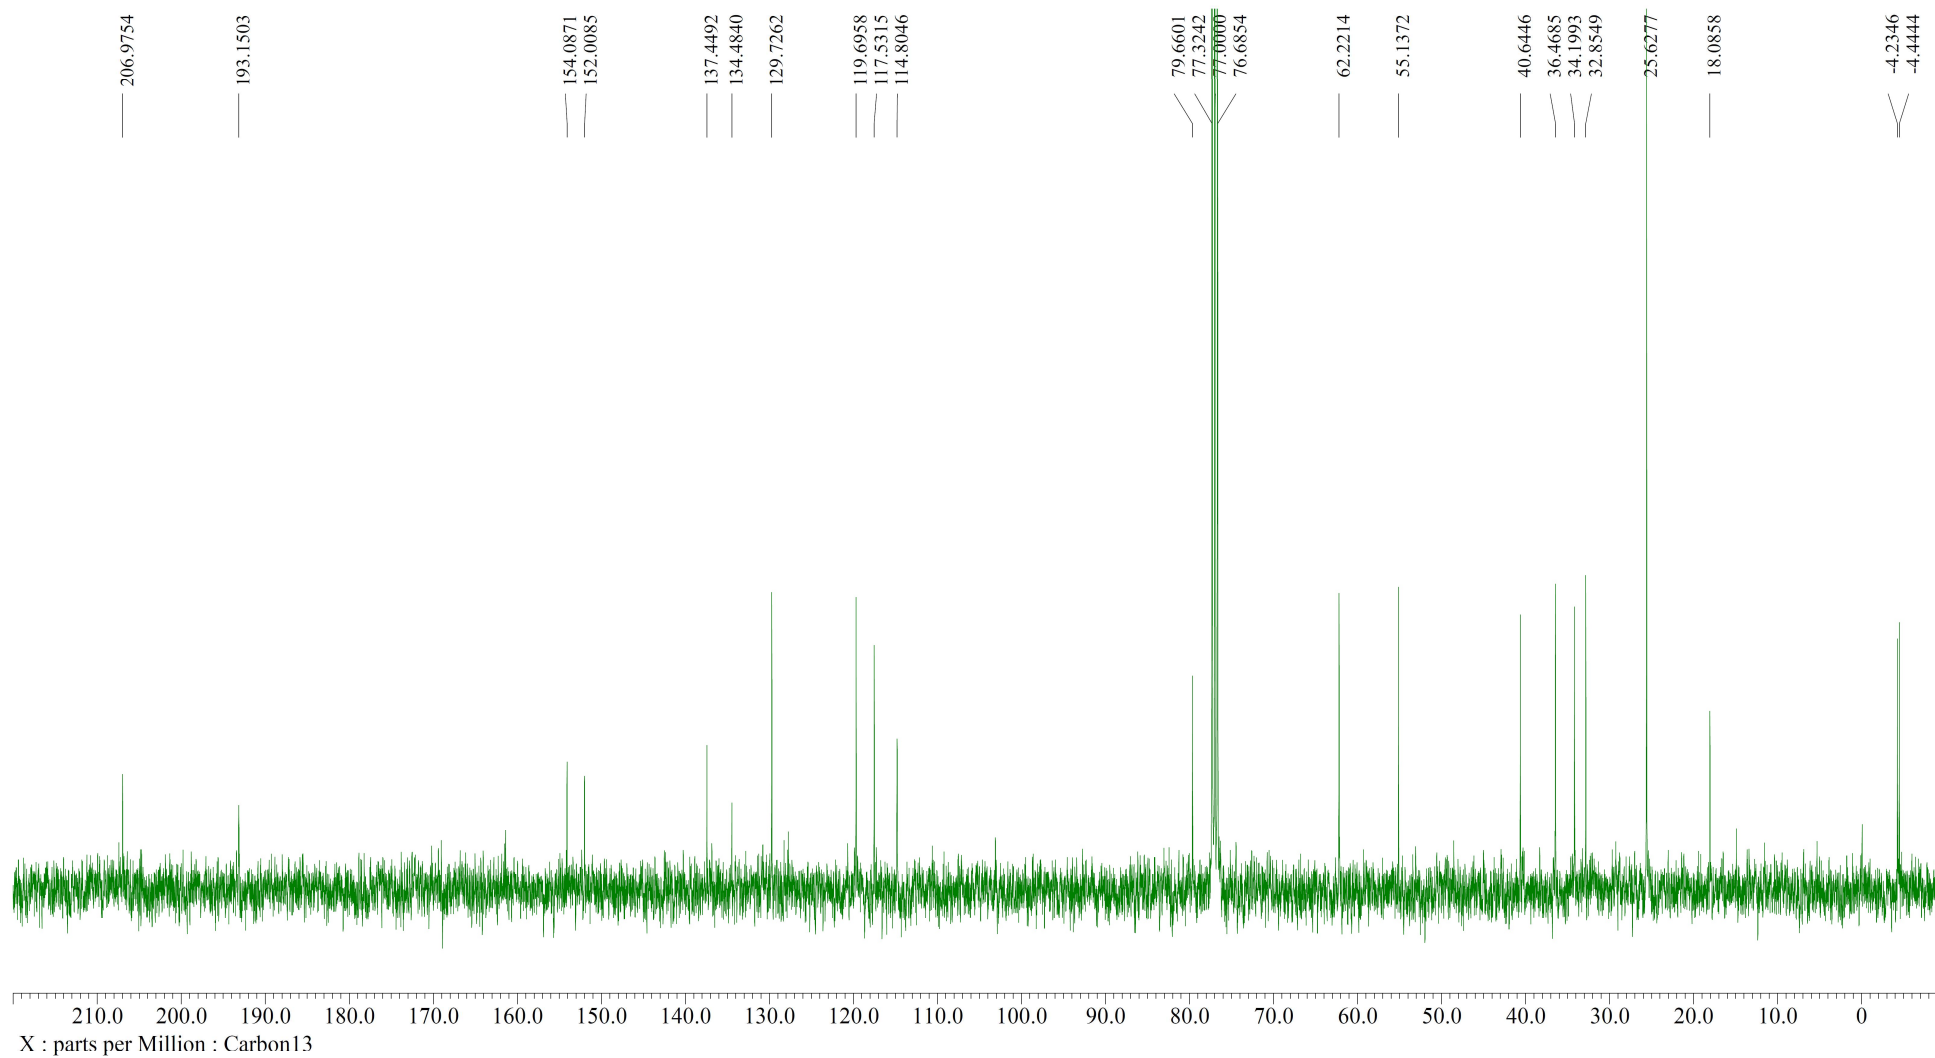

# NOESY

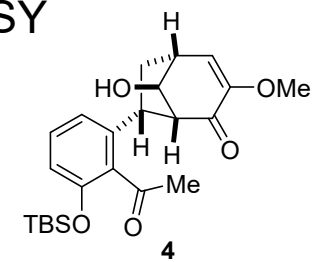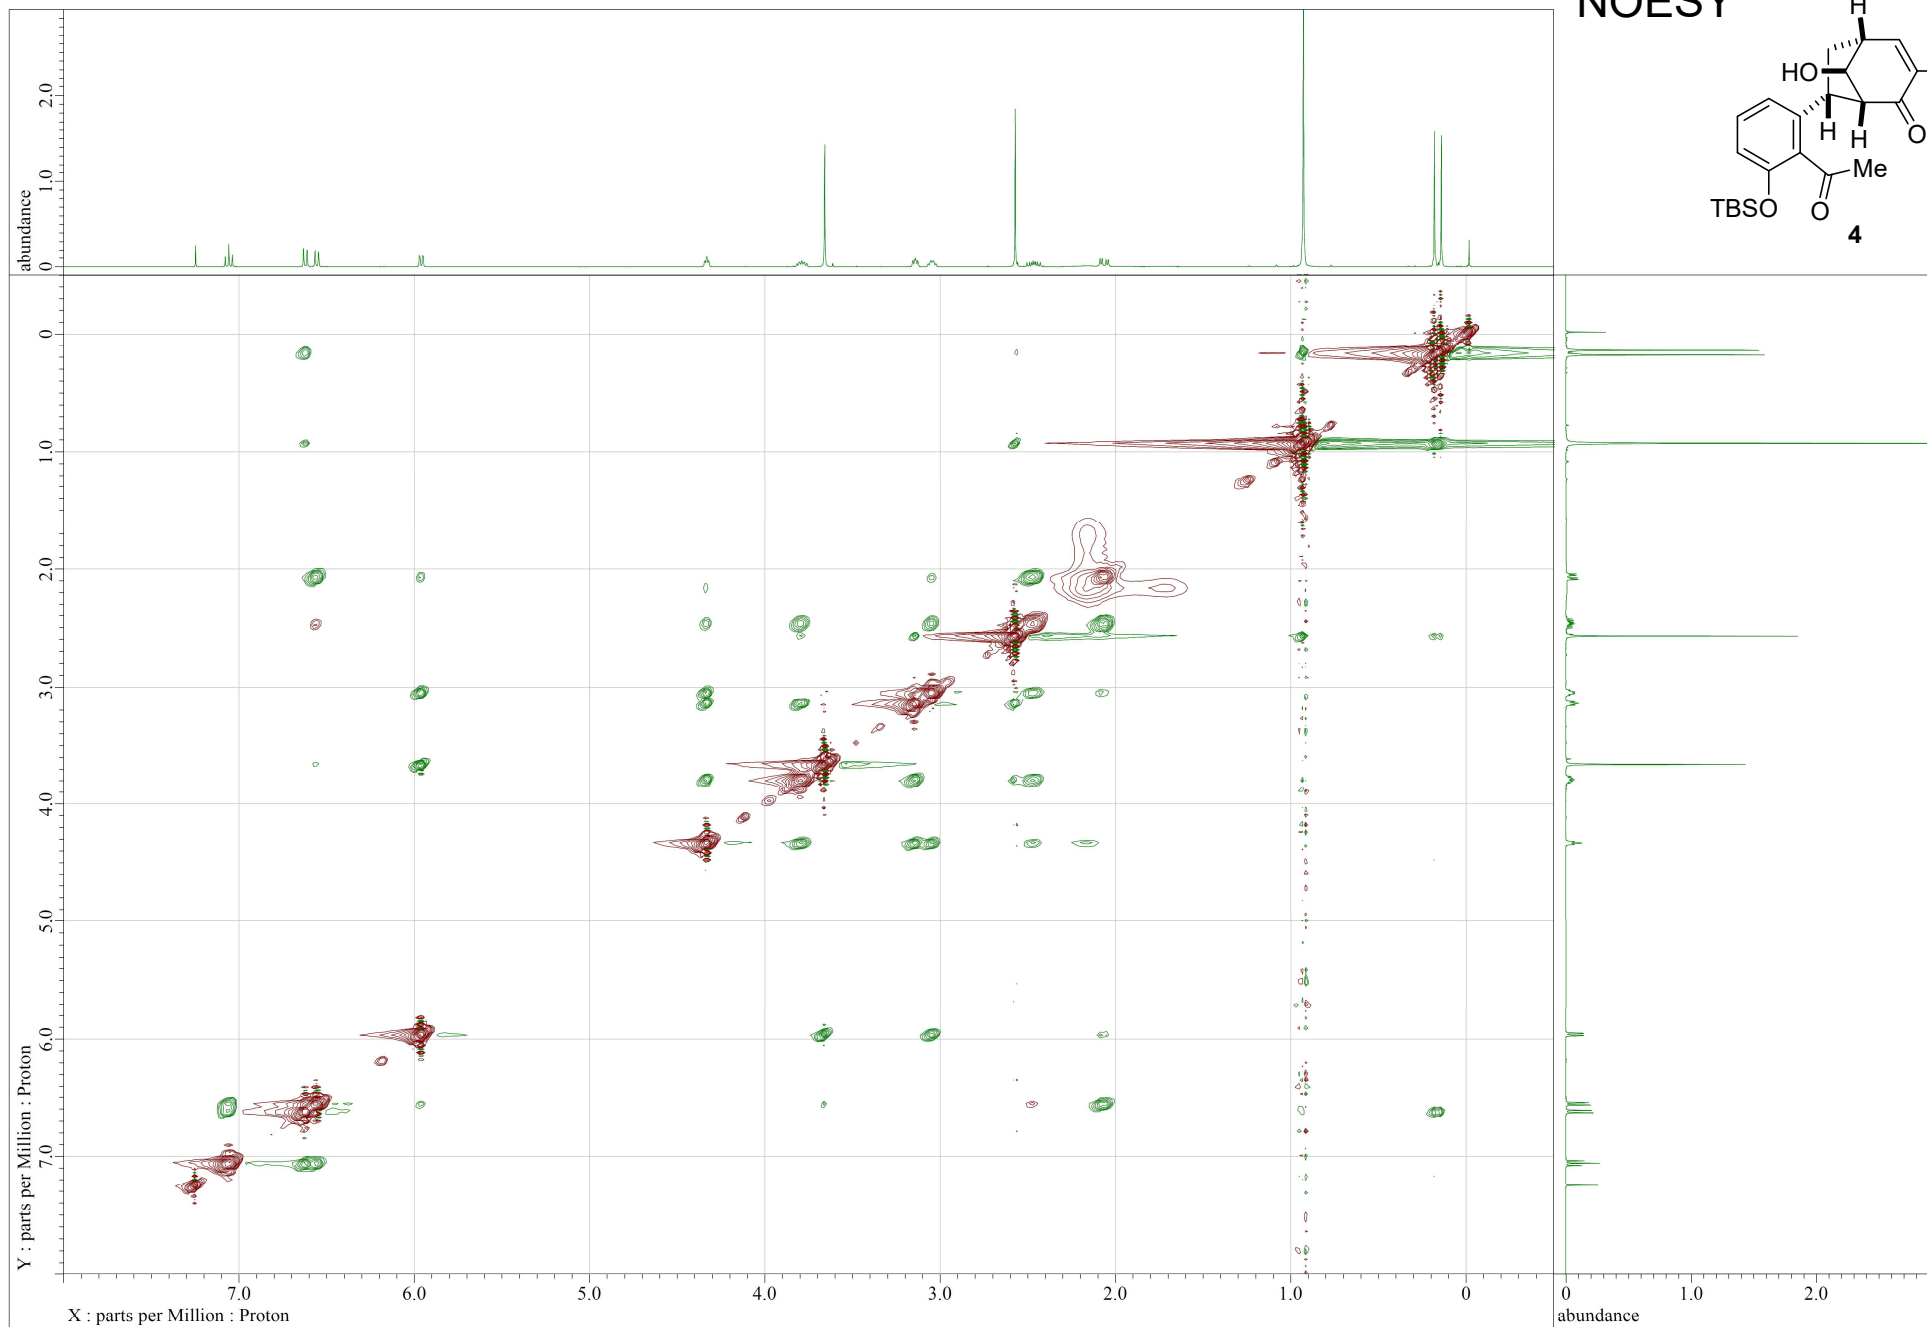

<sup>1</sup>H-NMR (400 MHz, CDCl<sub>3</sub>)

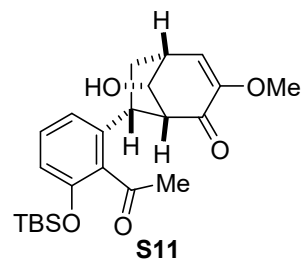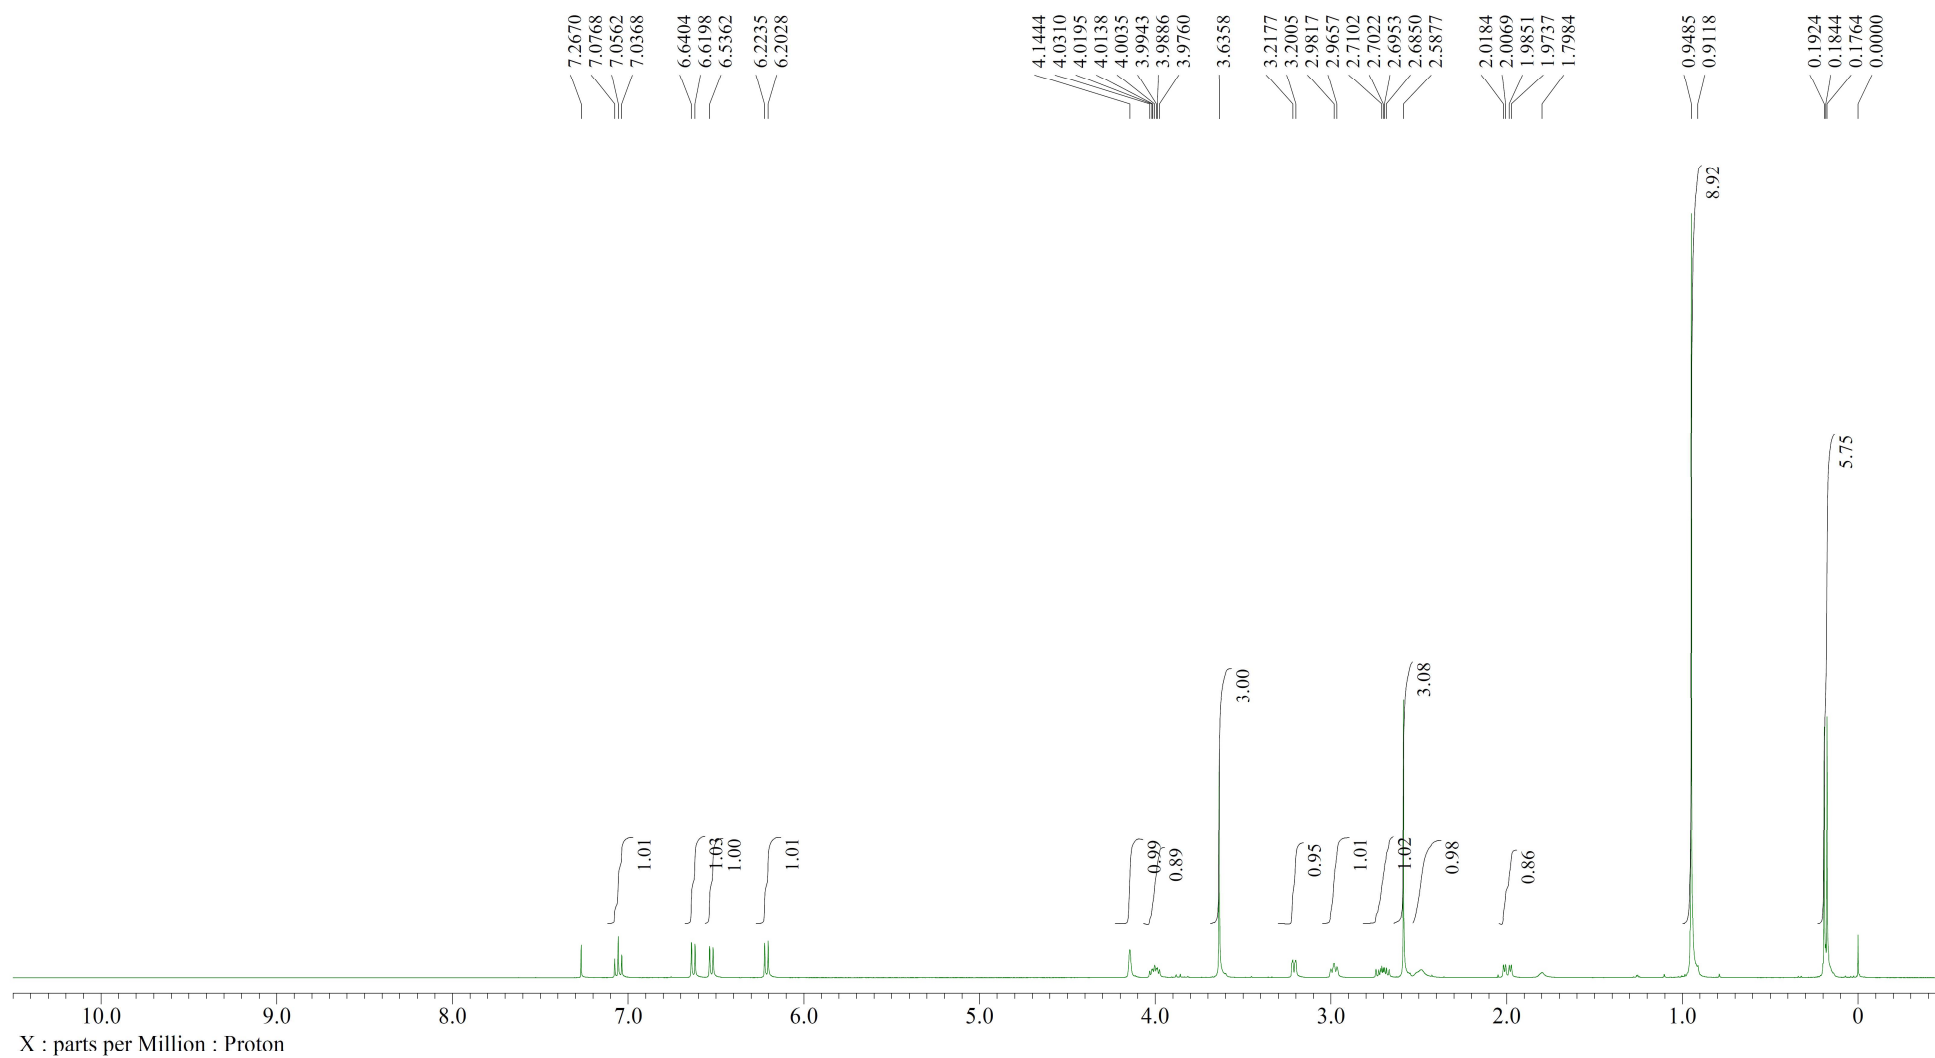

$^{13}\text{C}$ -NMR (100 MHz,  $\text{CDCl}_3$ )

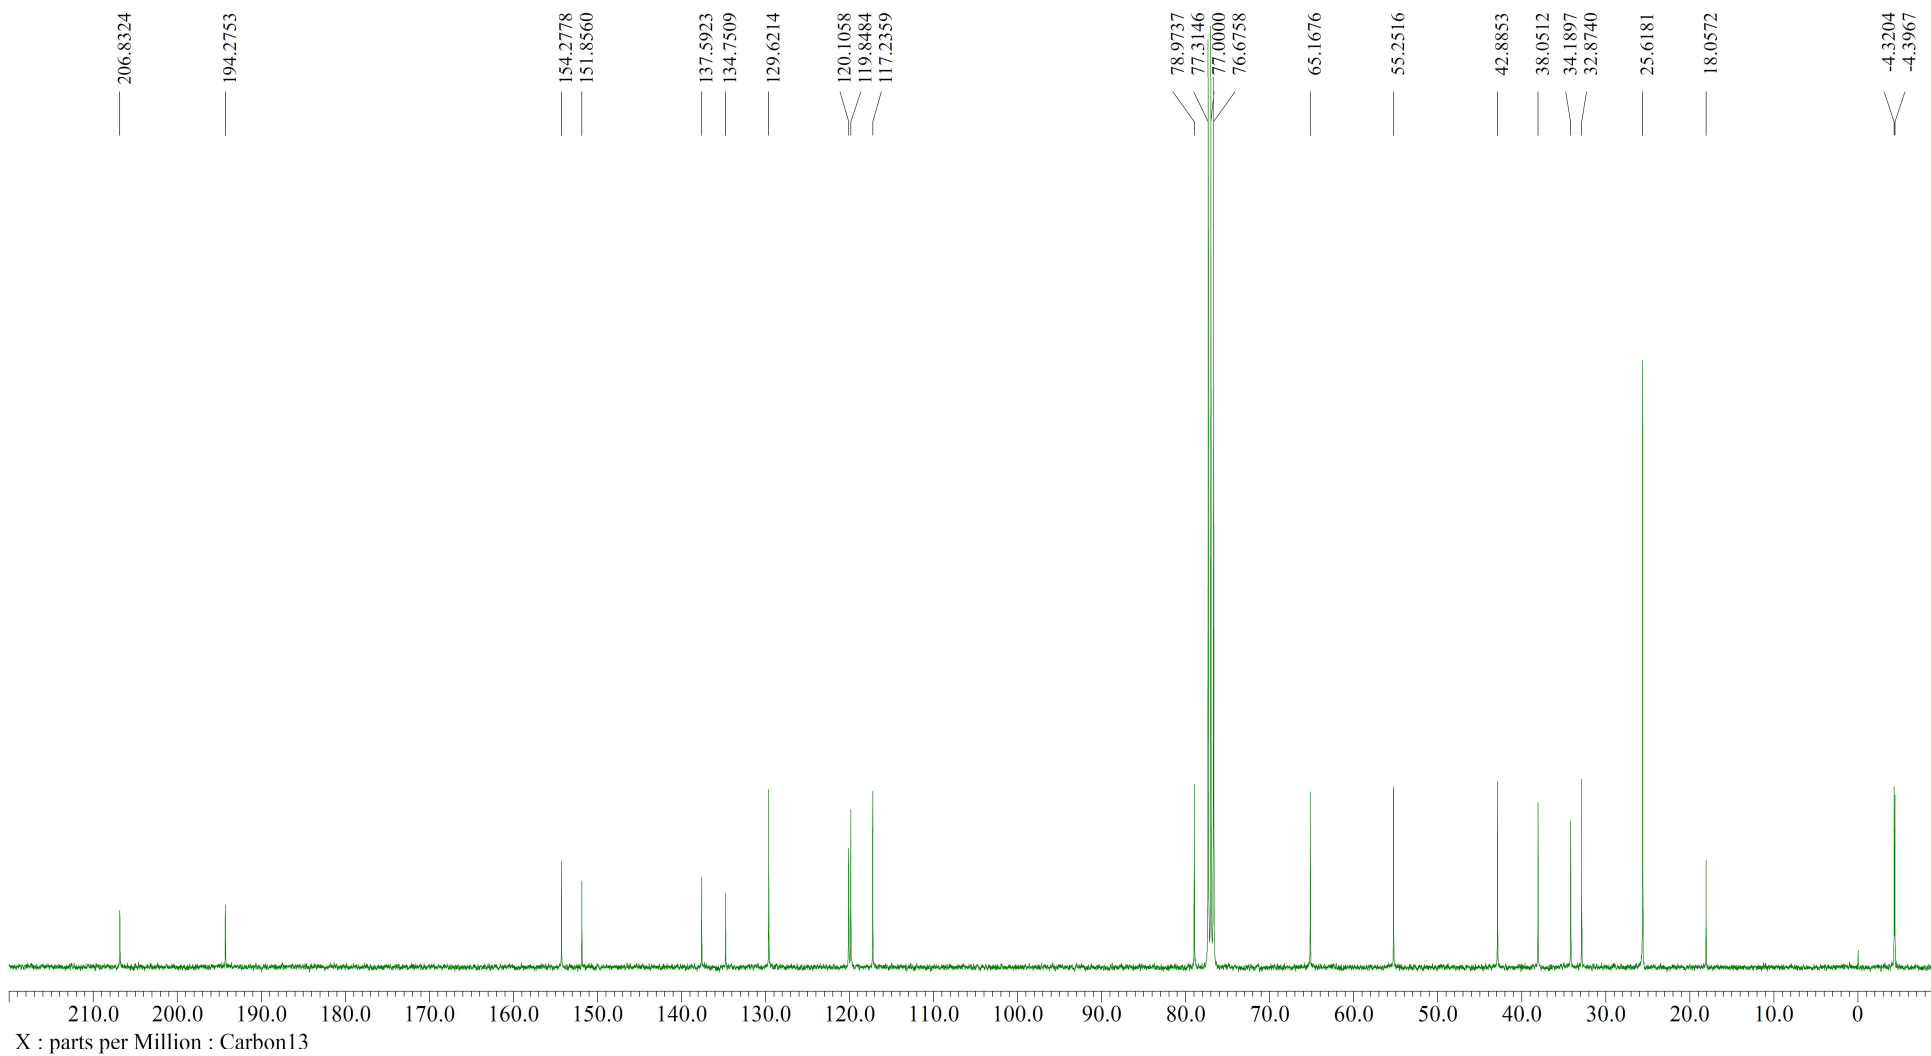

<sup>1</sup>H-NMR (400 MHz, CDCl<sub>3</sub>)

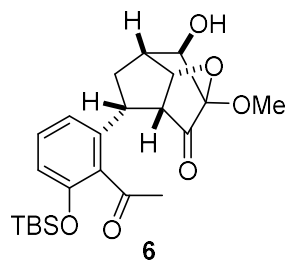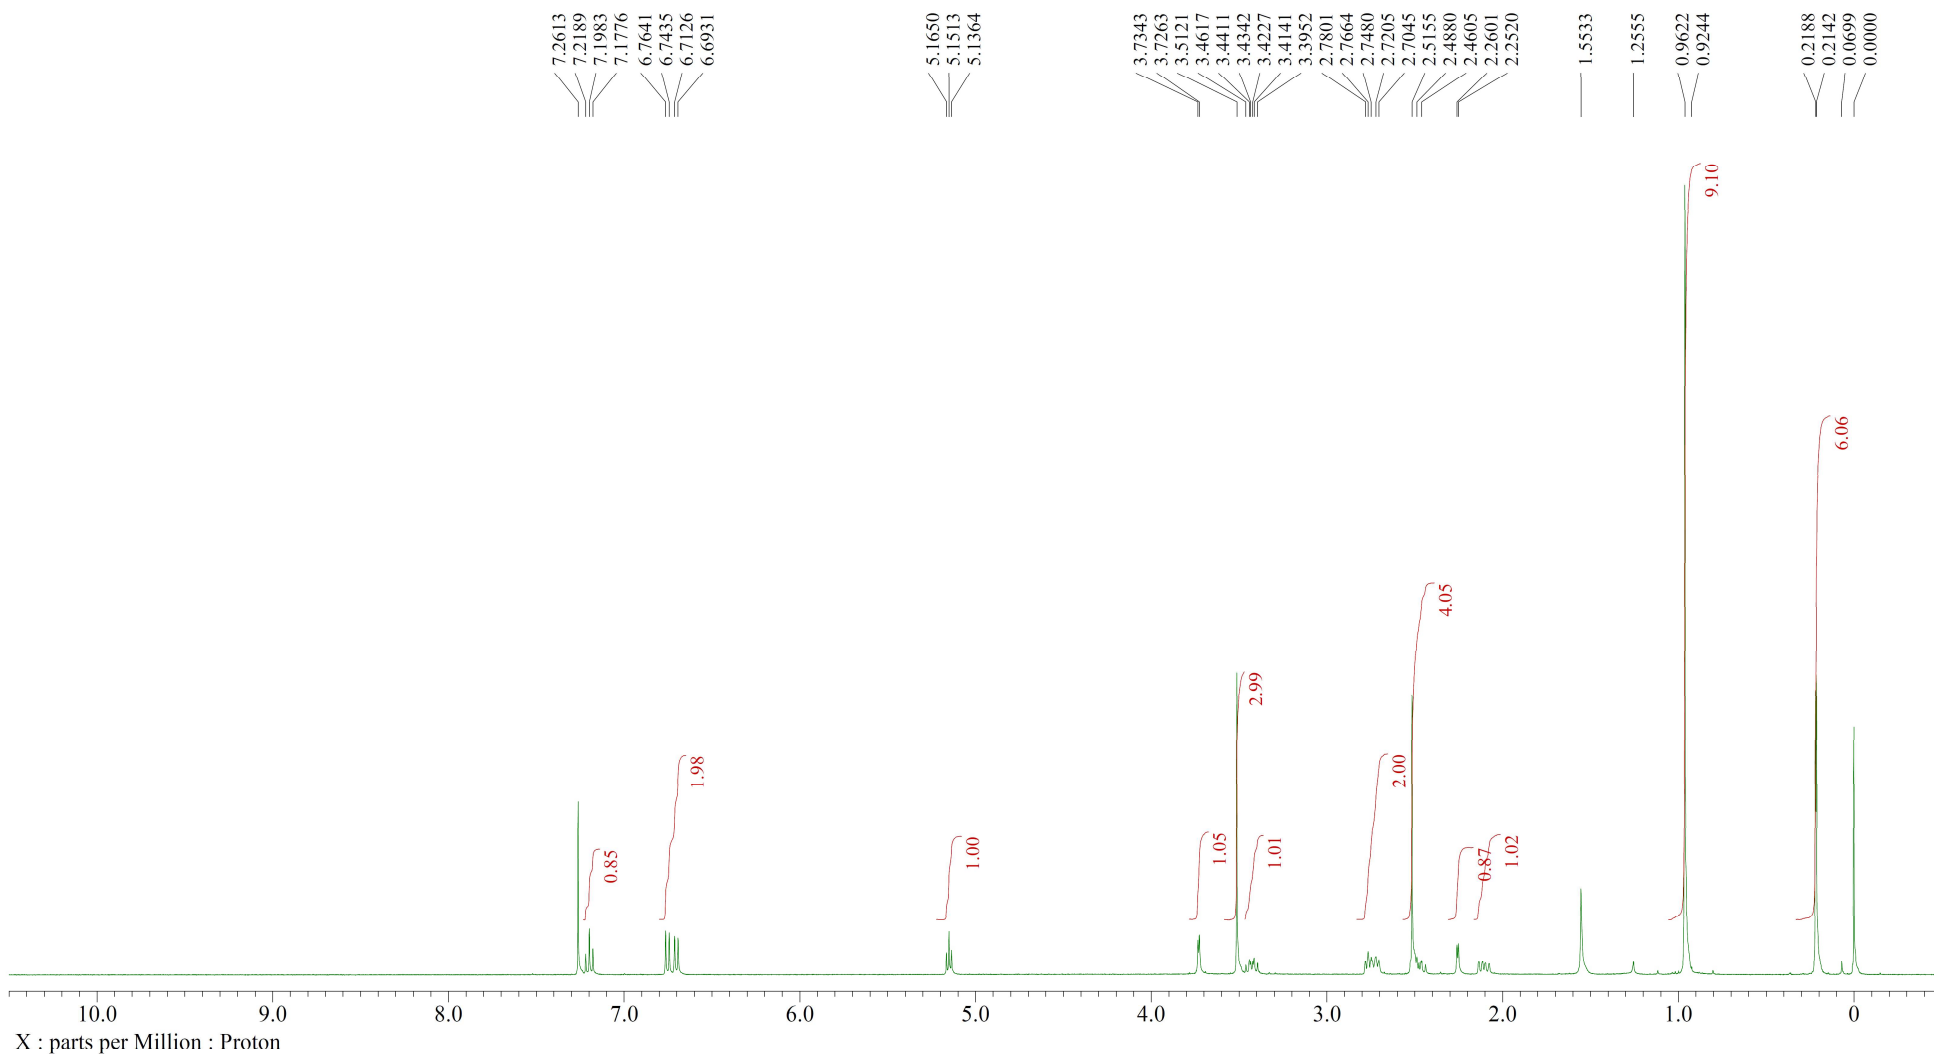

<sup>13</sup>C-NMR (100 MHz, CDCl<sub>3</sub>)

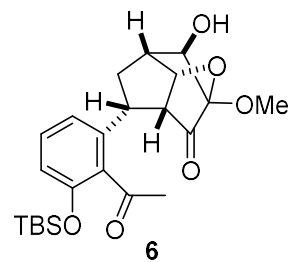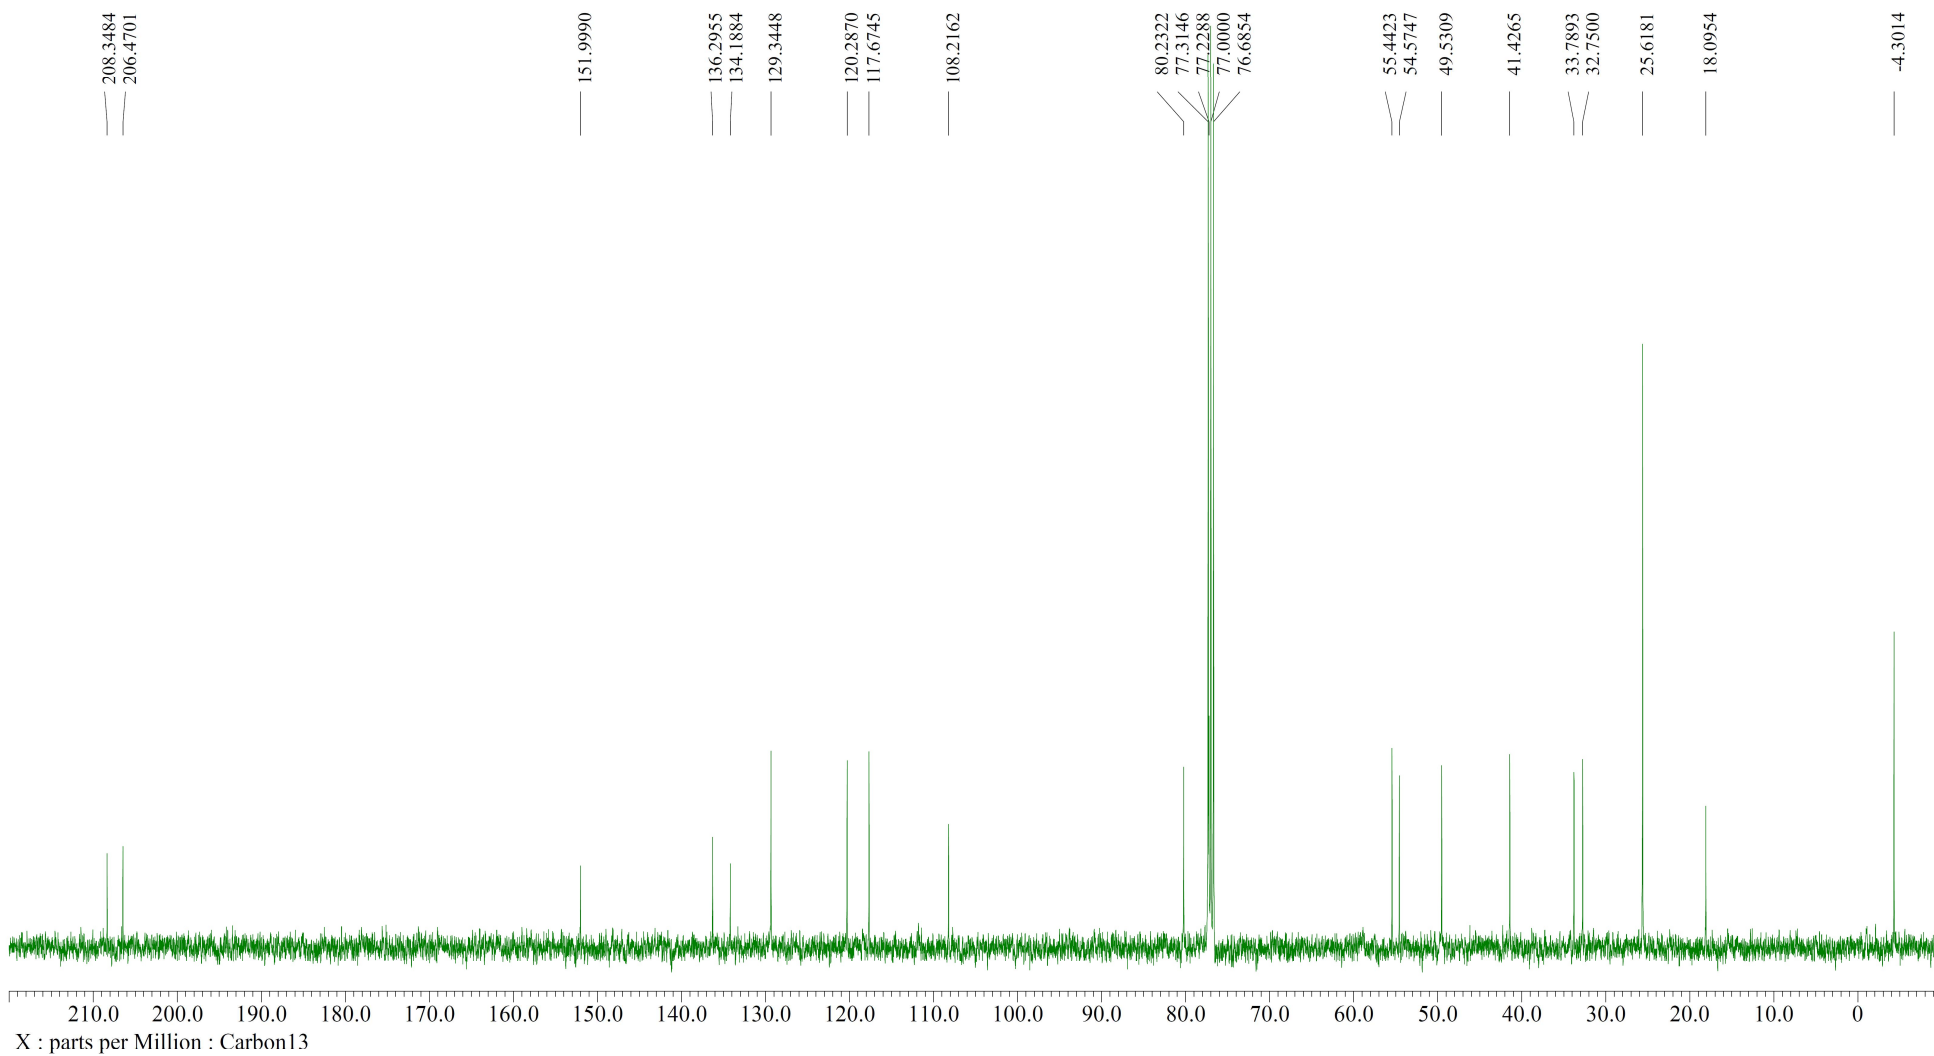

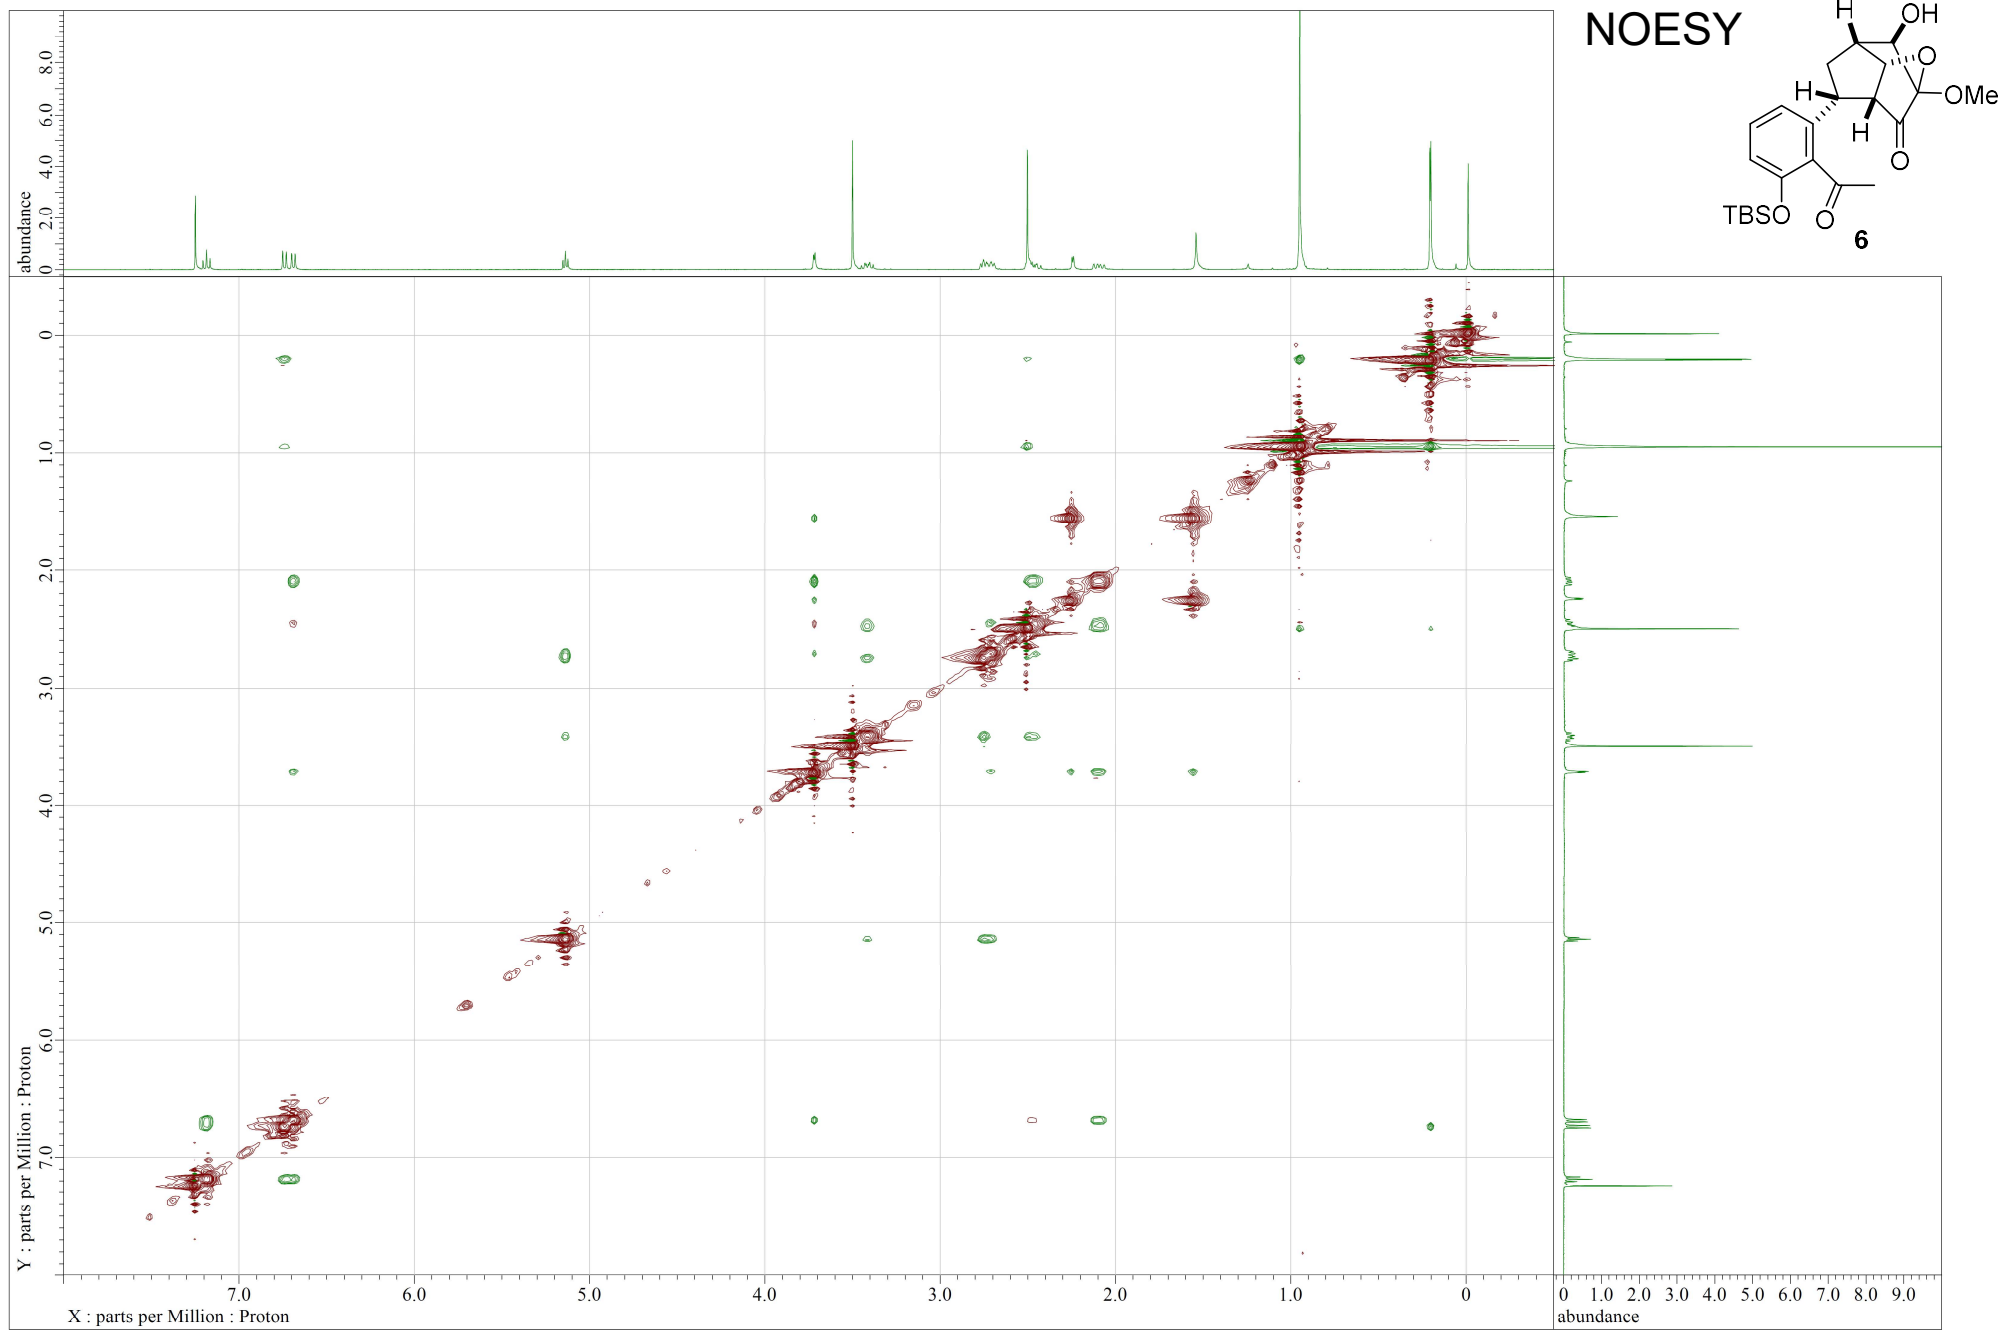

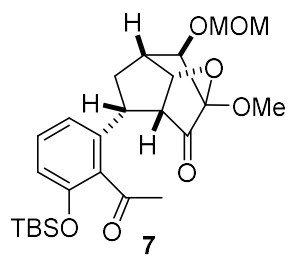

# <sup>1</sup>H-NMR (400 MHz, CDCl<sub>3</sub>)

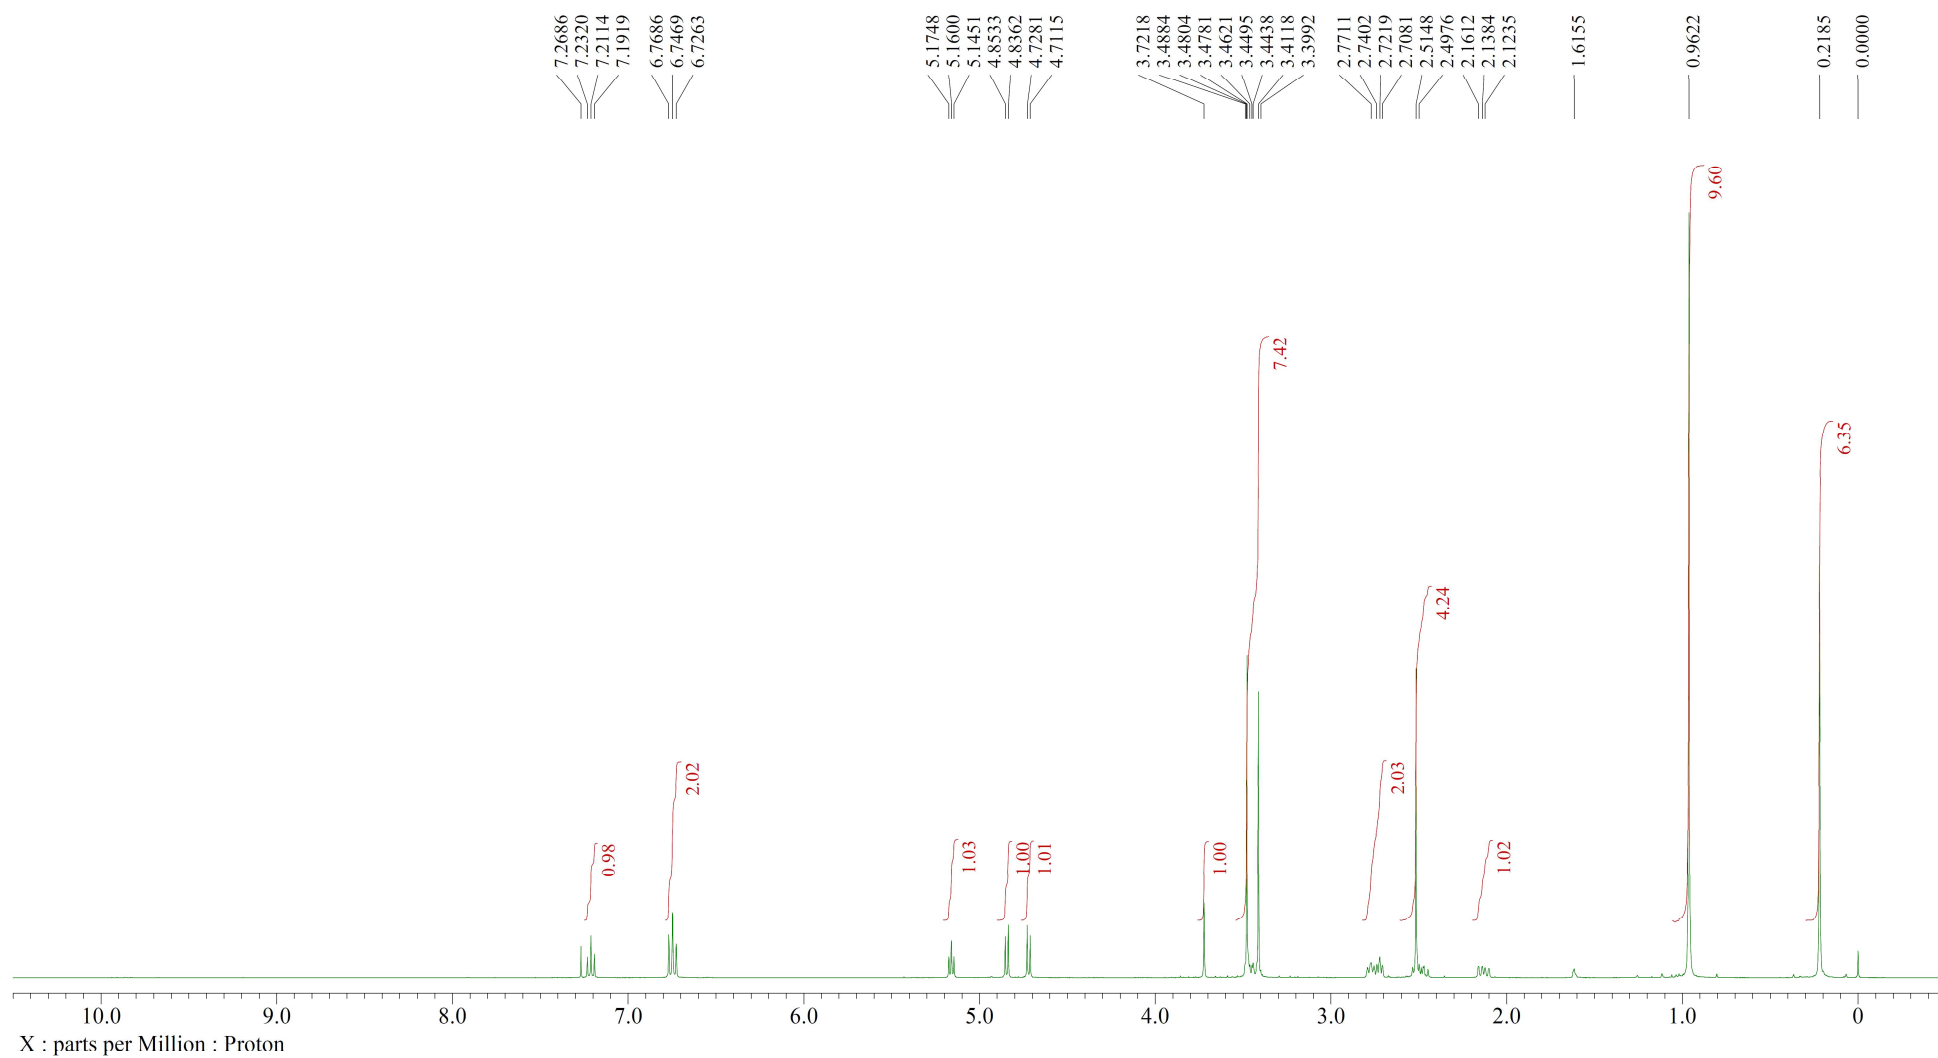



<sup>13</sup>C-NMR (100 MHz, CDCl<sub>3</sub>)

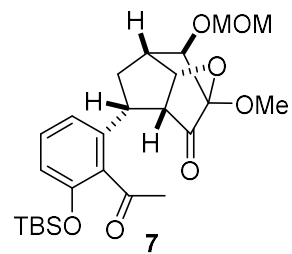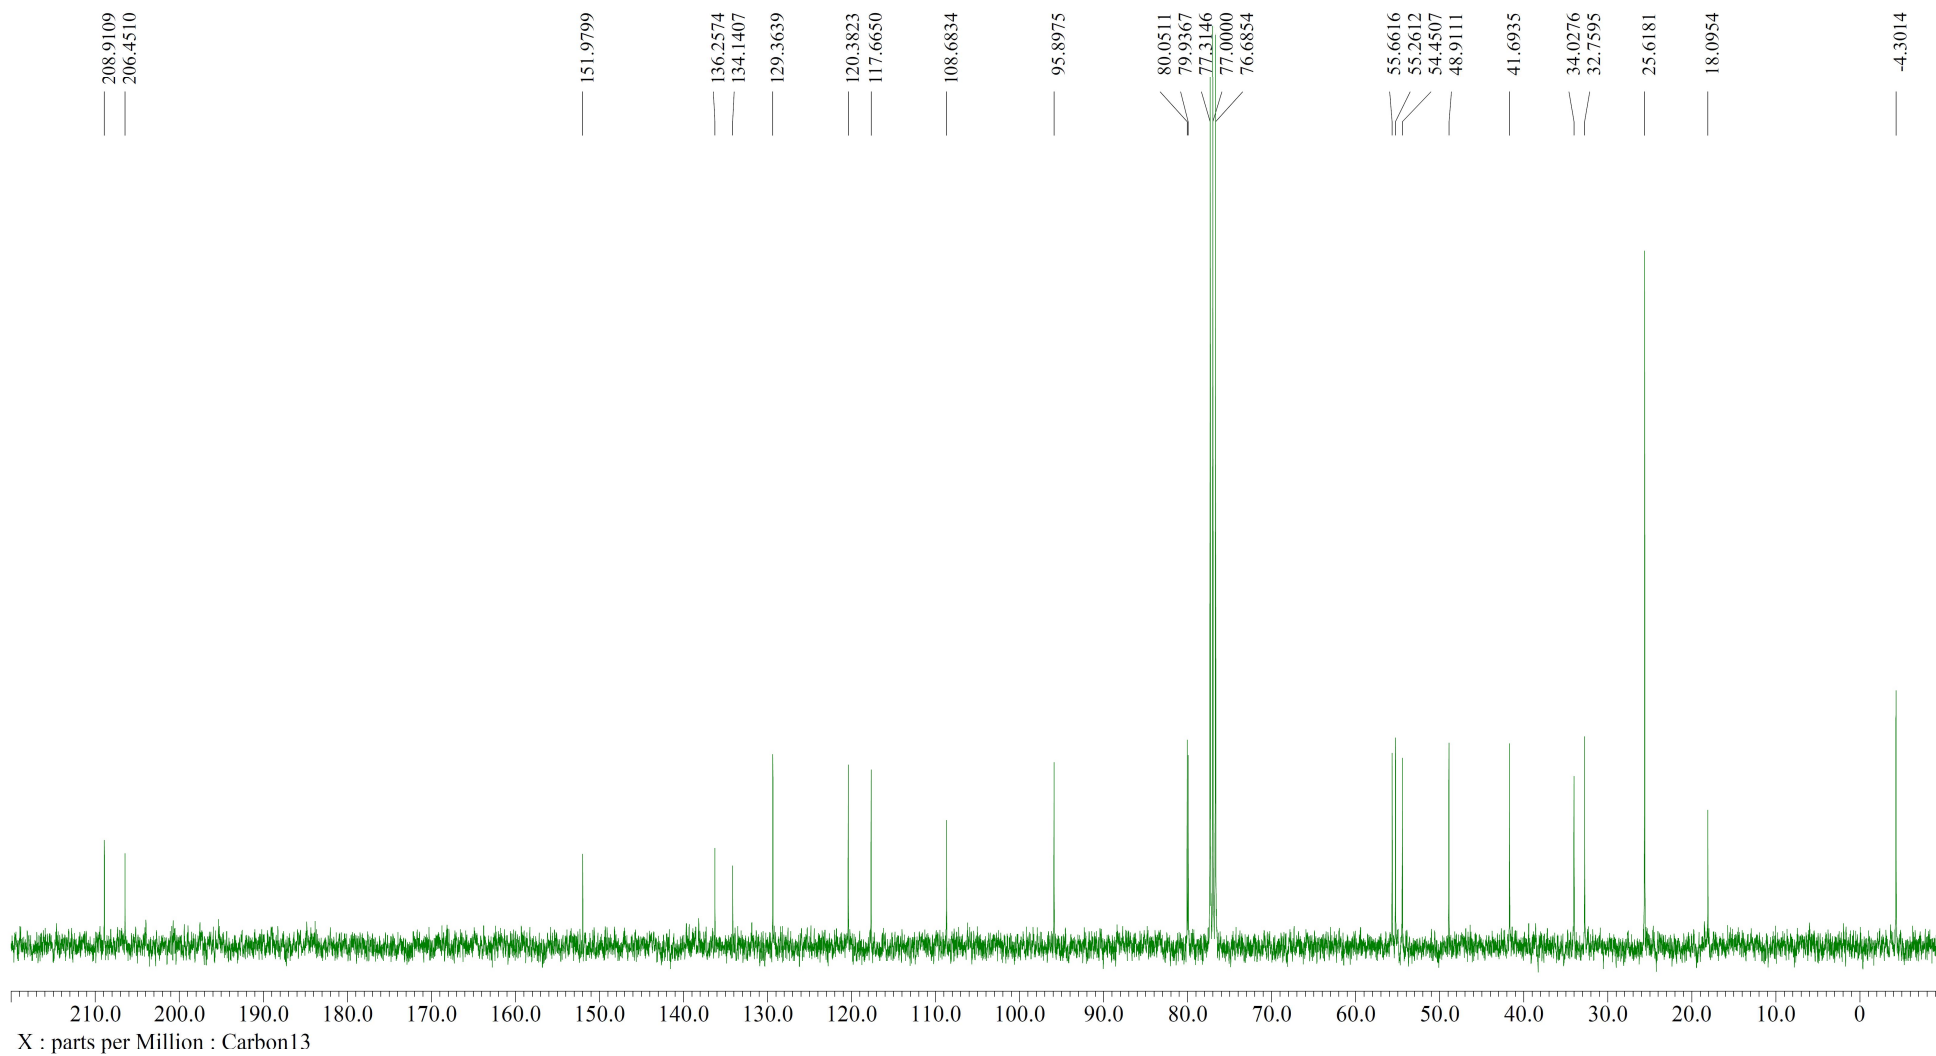

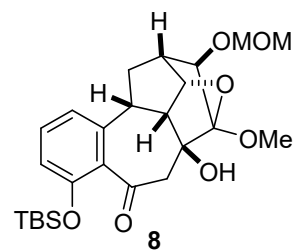

# <sup>1</sup>H-NMR (400 MHz, CDCl<sub>3</sub>)

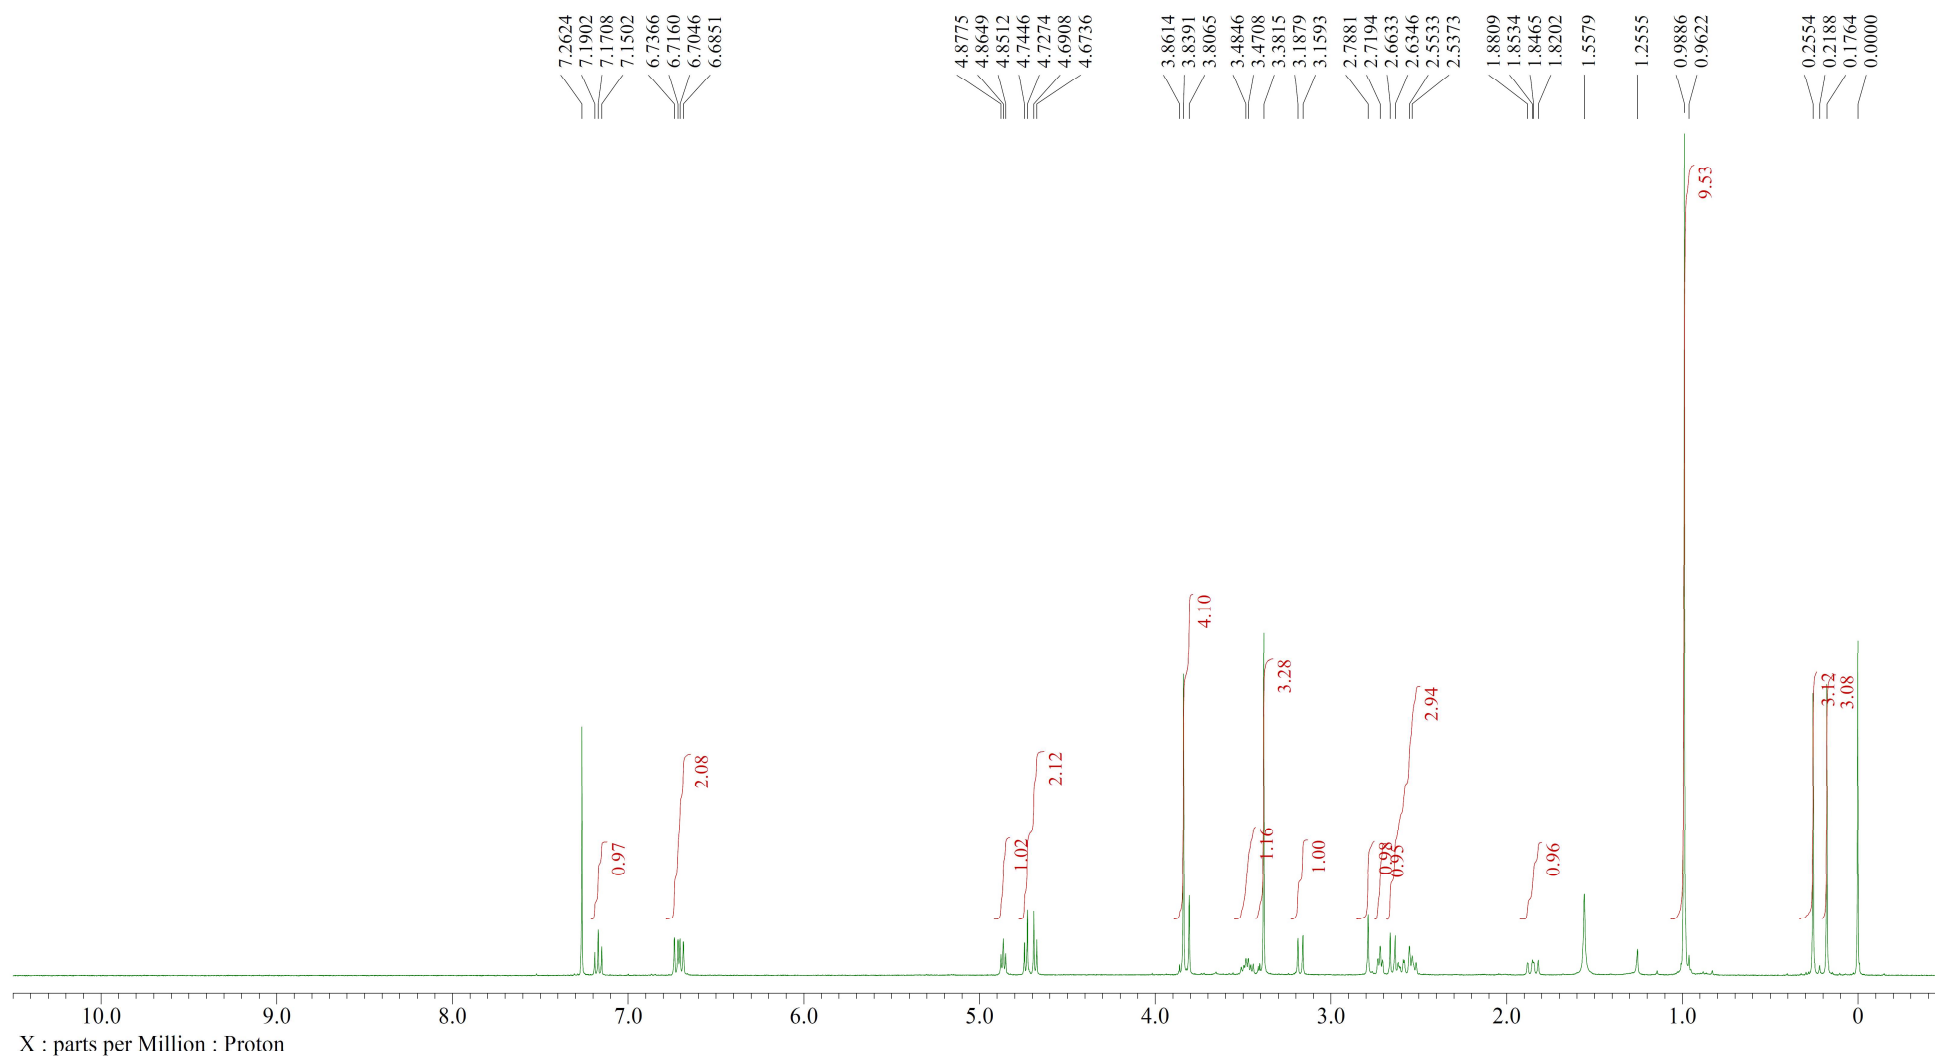

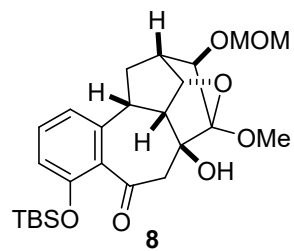

$^{13}\text{C}$ -NMR (100 MHz,  $\text{CDCl}_3$ )

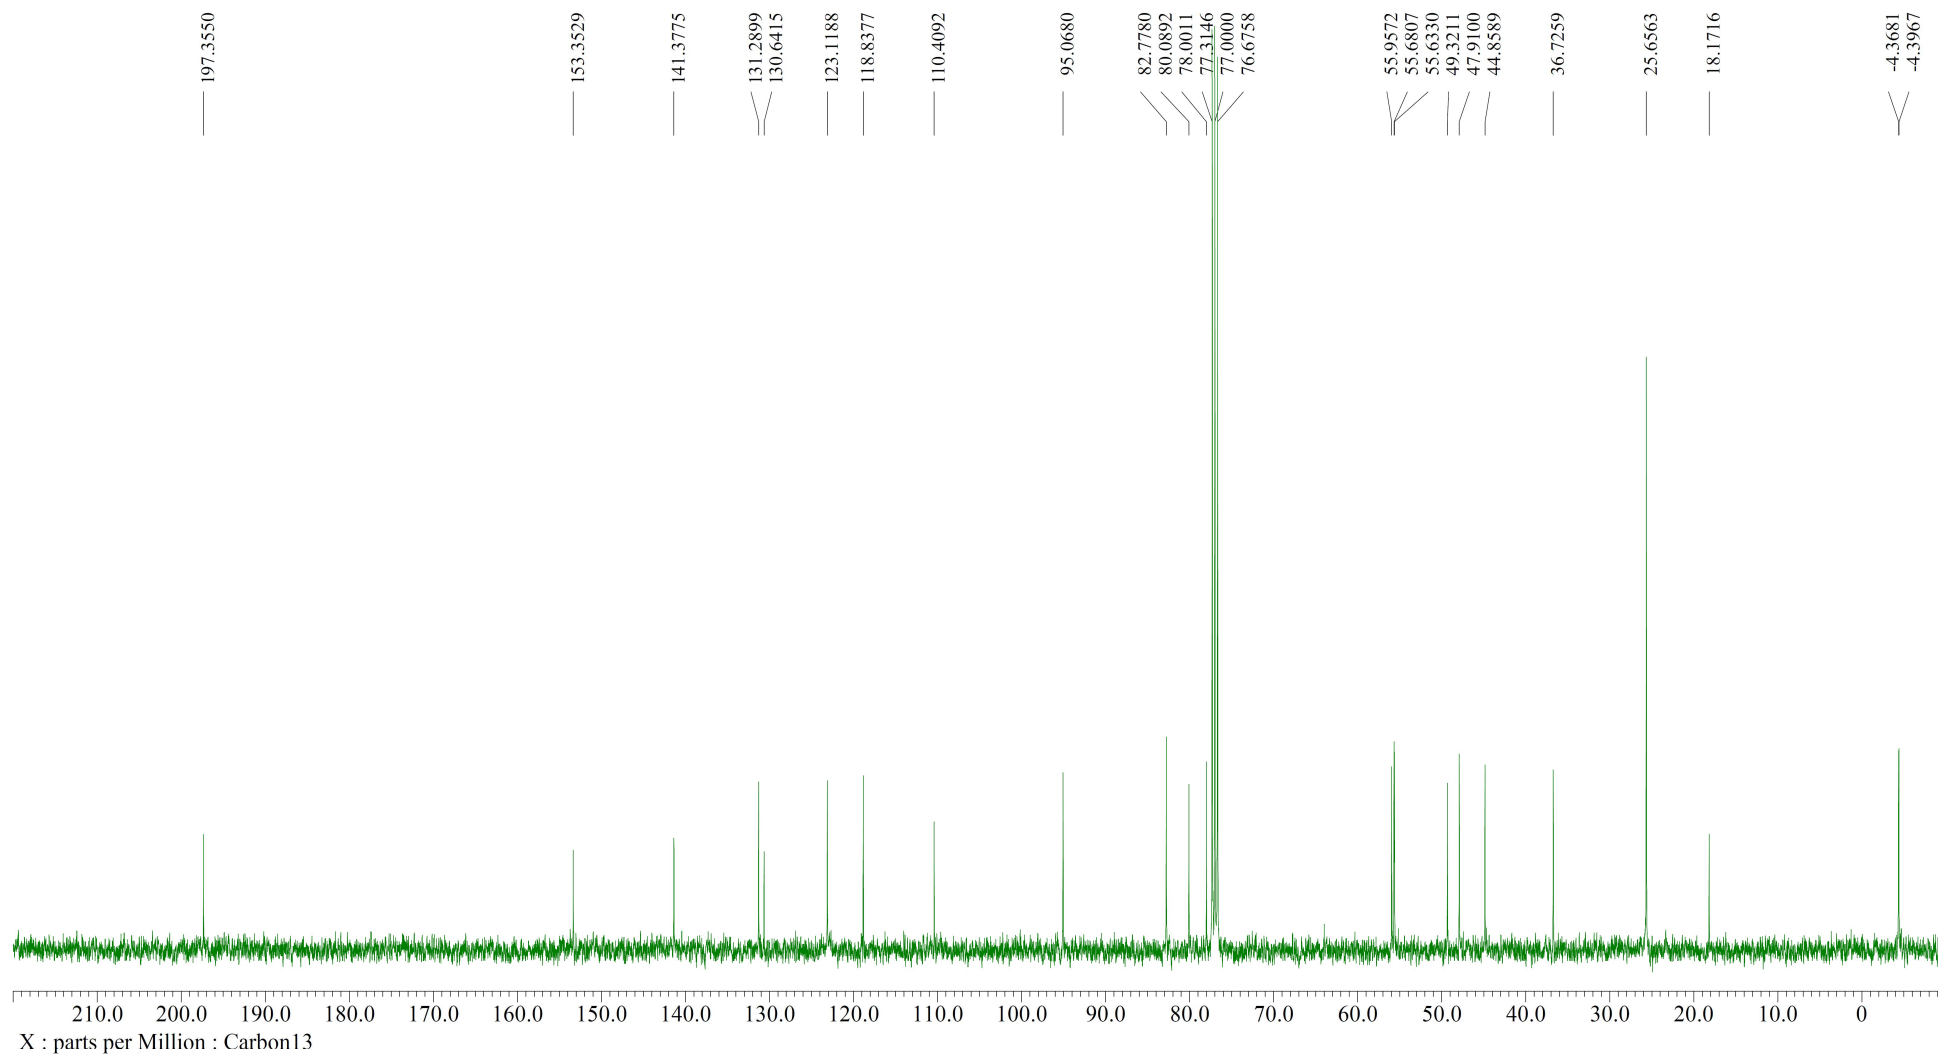

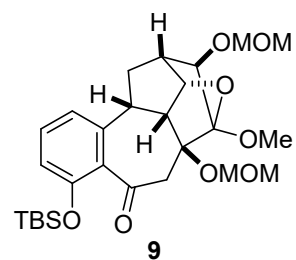

# <sup>1</sup>H-NMR (400 MHz, CDCl<sub>3</sub>)

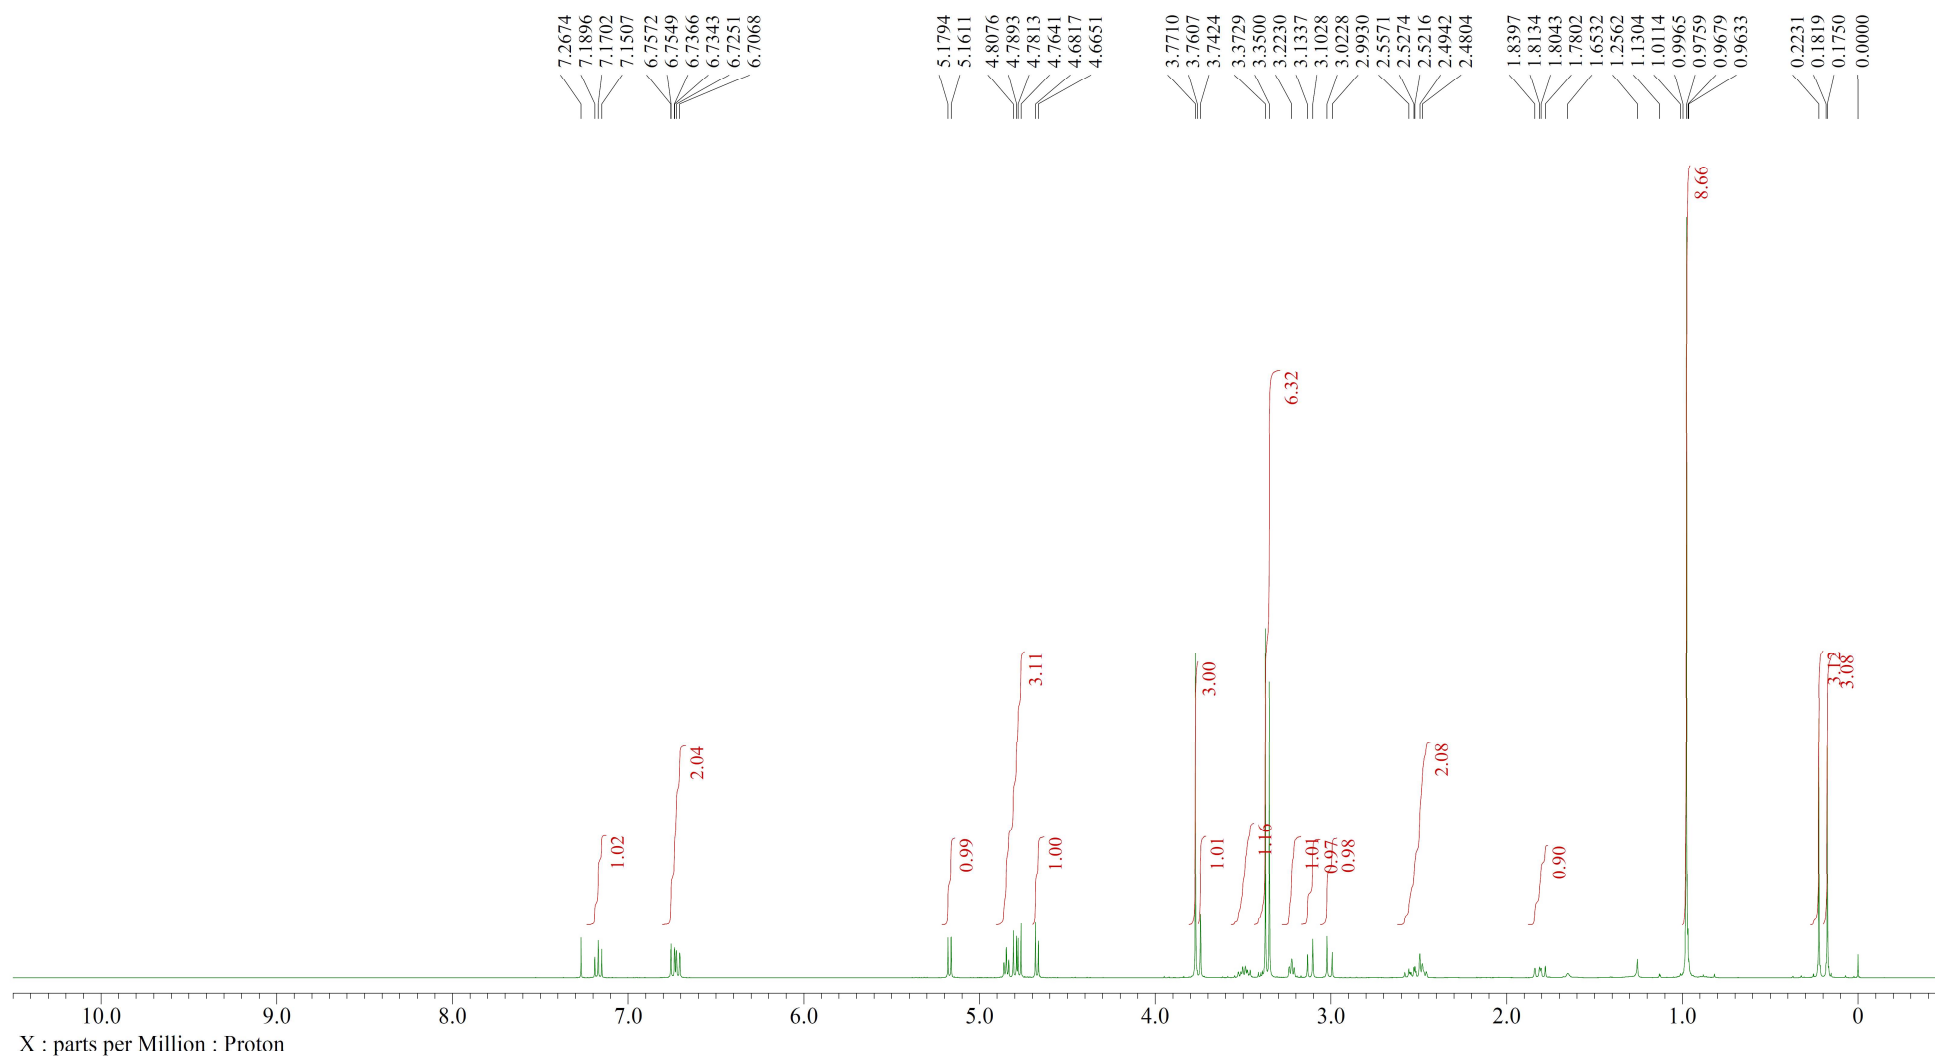



$^{13}\text{C}$ -NMR (100 MHz,  $\text{CDCl}_3$ )

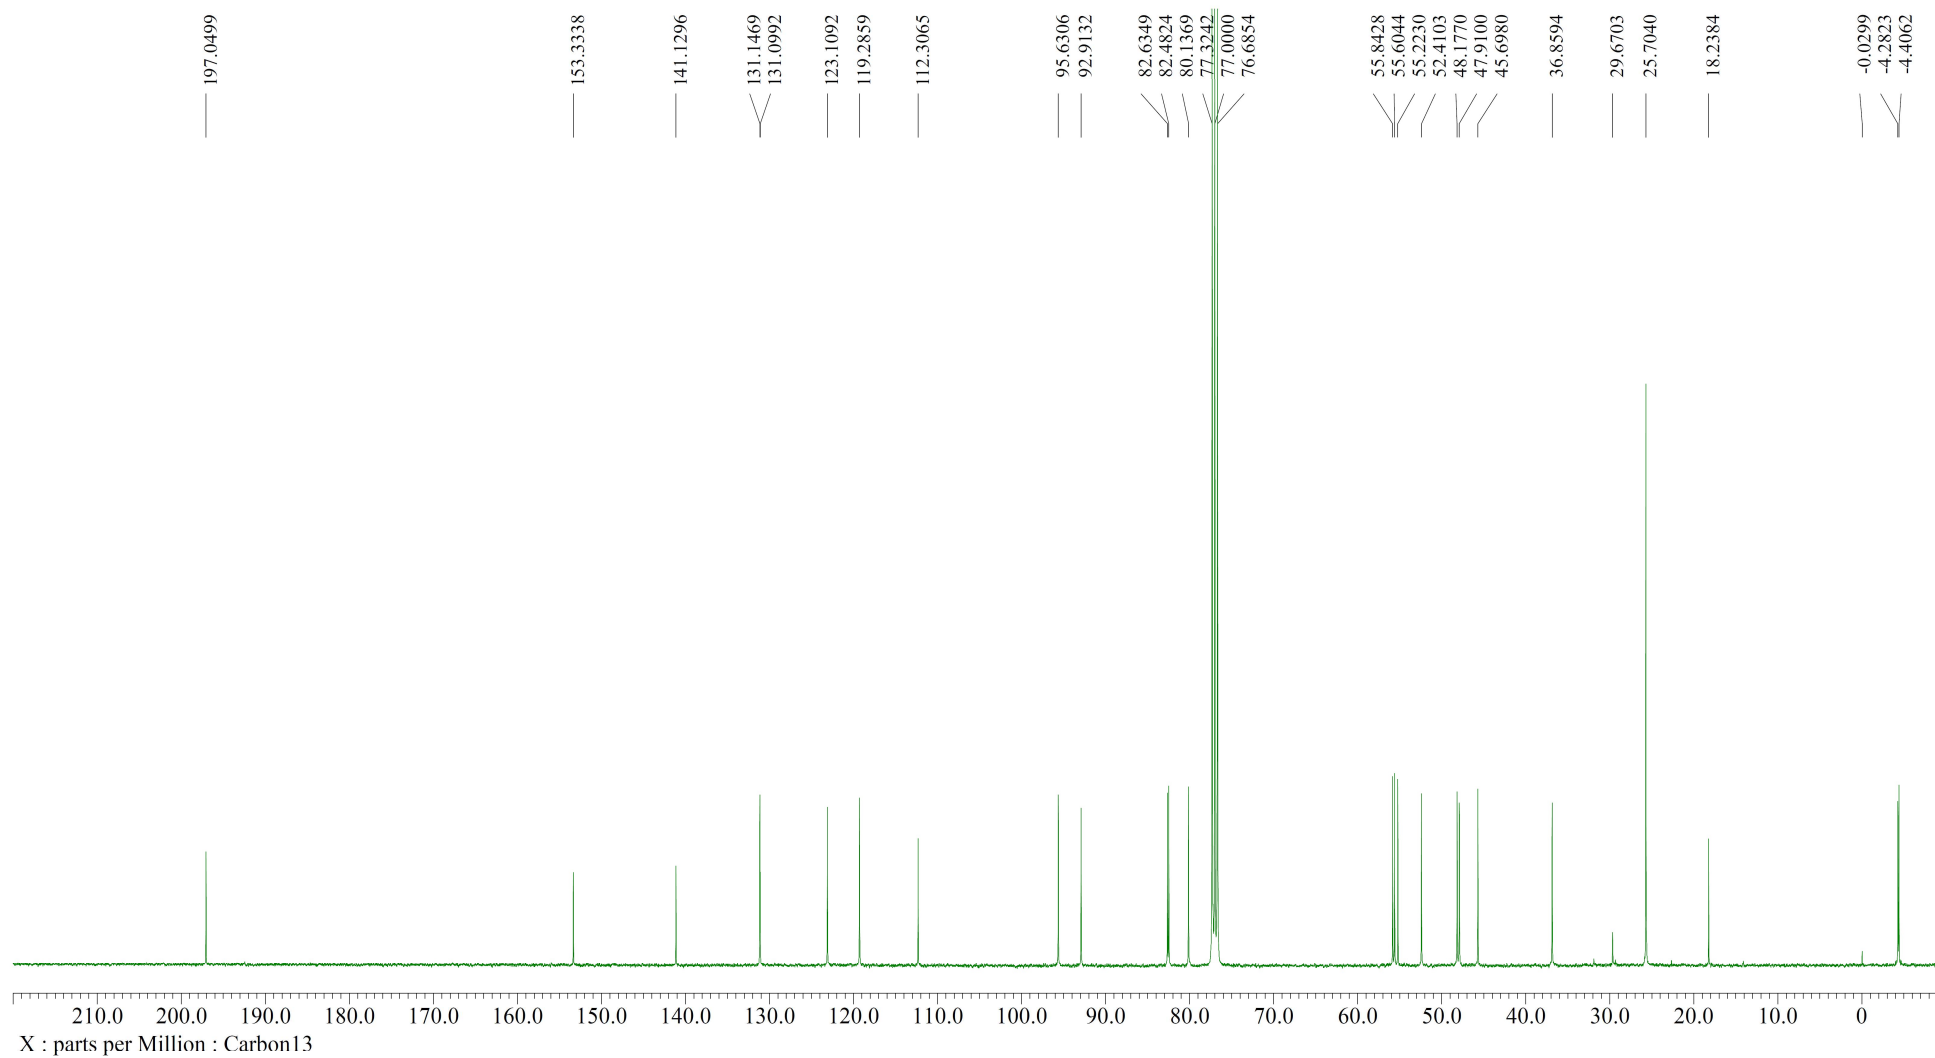

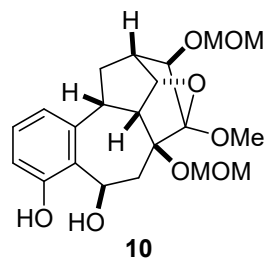

# <sup>1</sup>H-NMR (400 MHz, CDCl<sub>3</sub>)

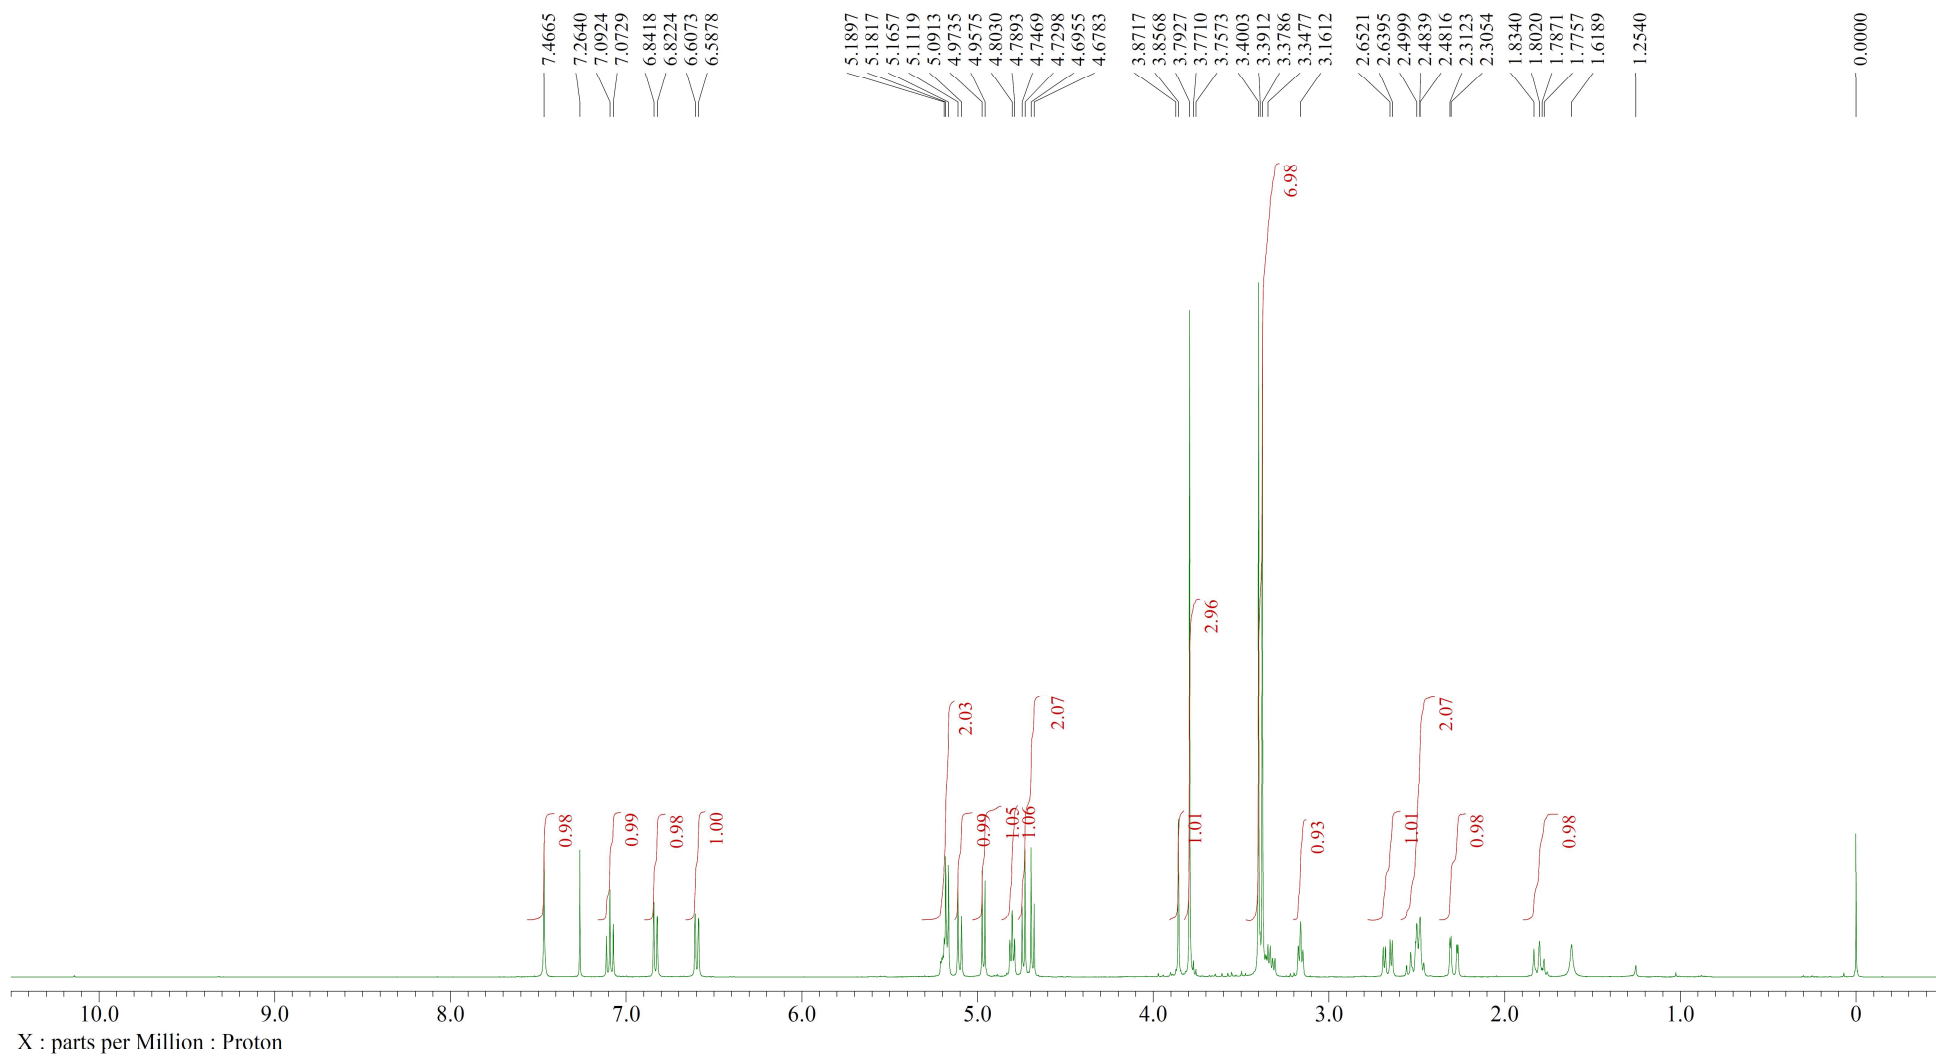



$^{13}\text{C-NMR}$  (100 MHz,  $\text{CDCl}_3$ )

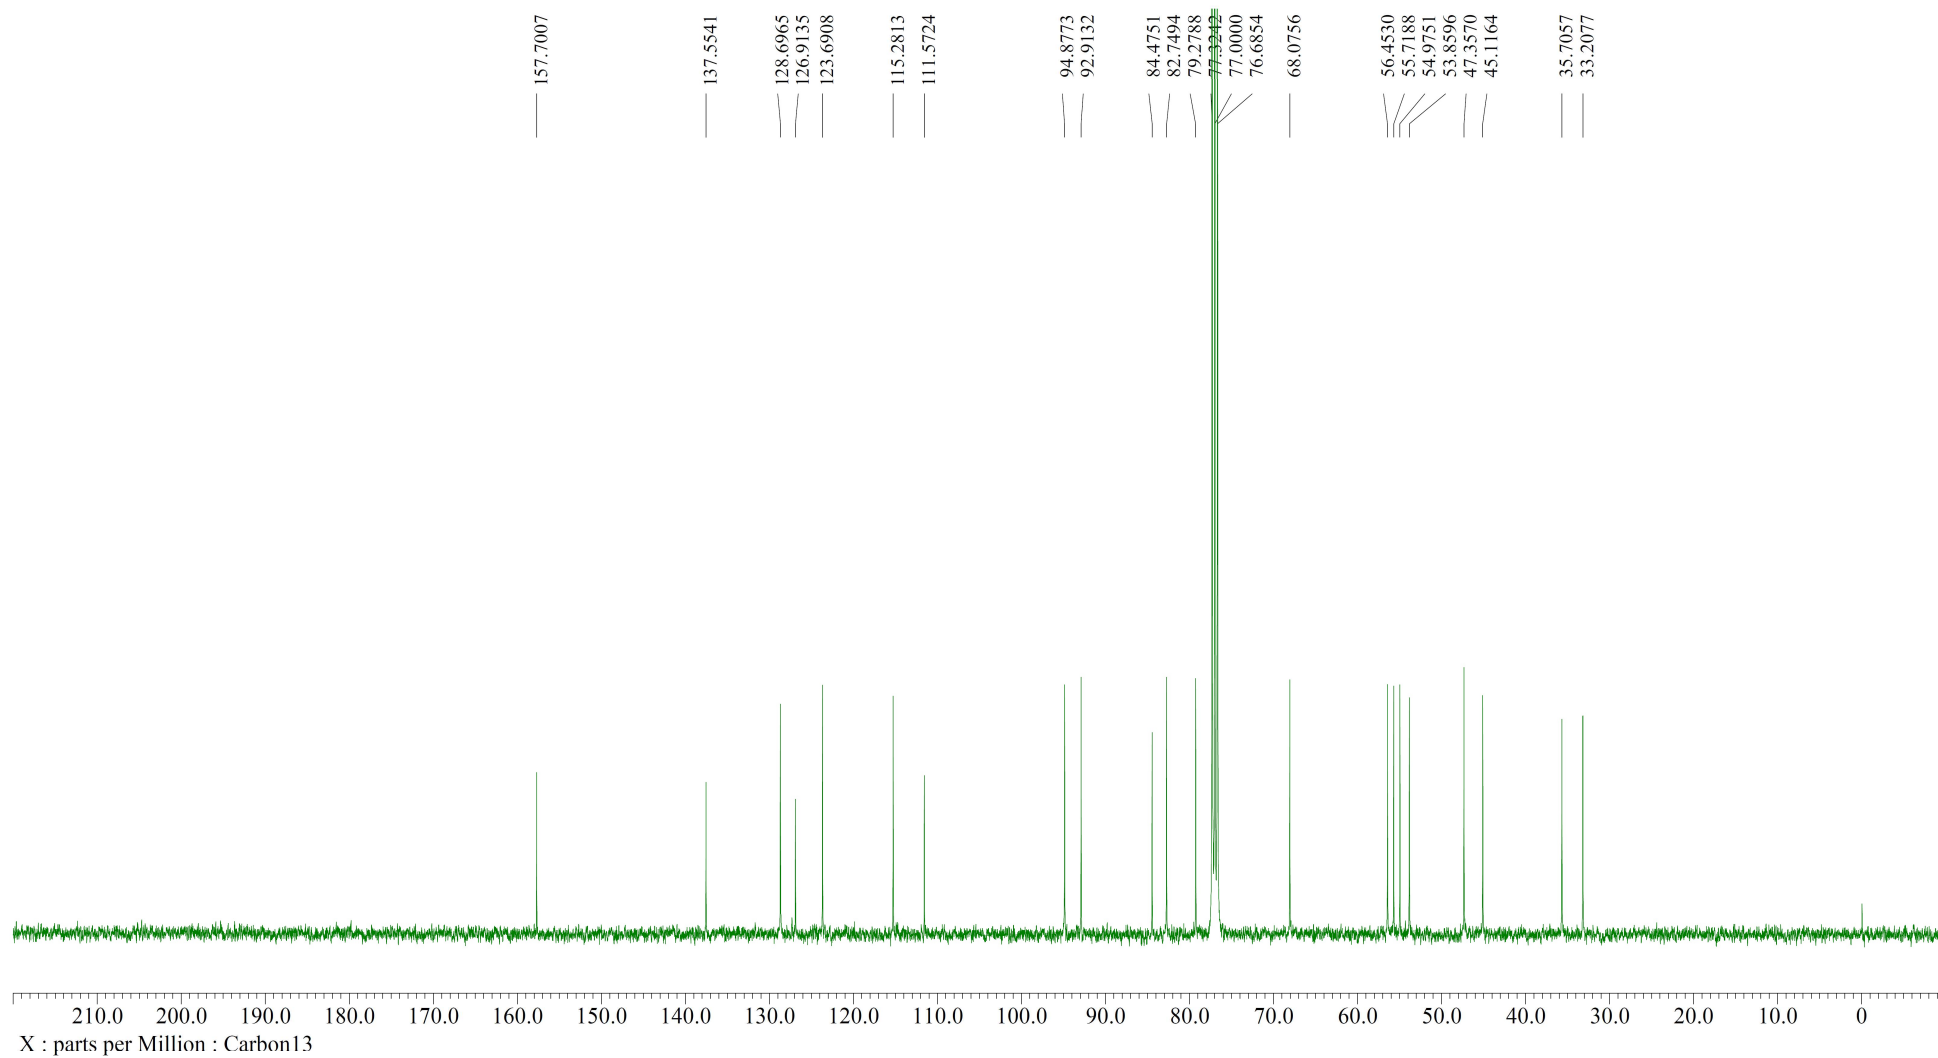

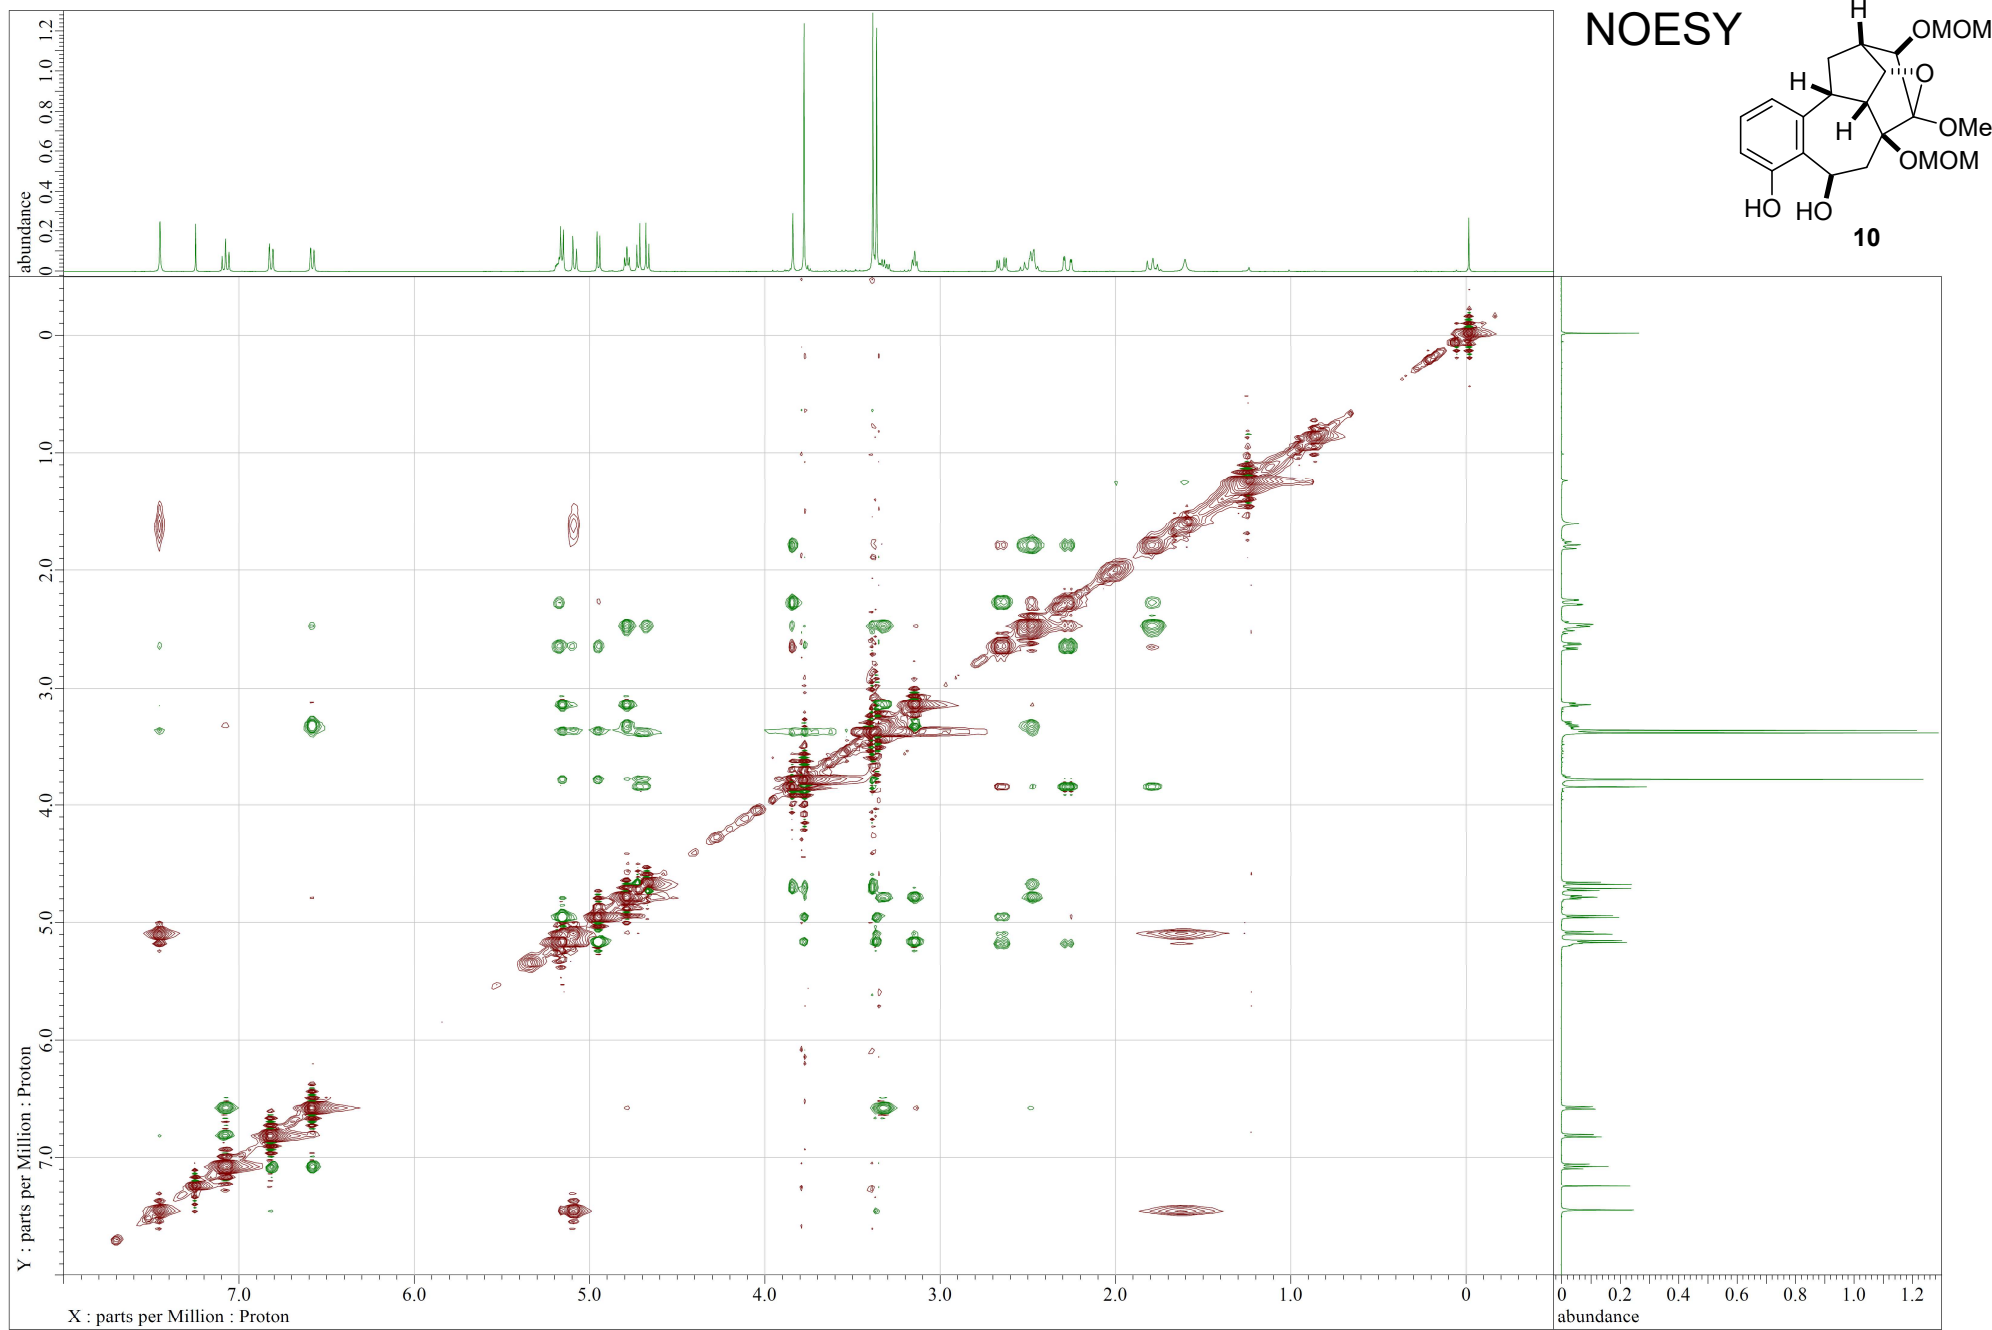



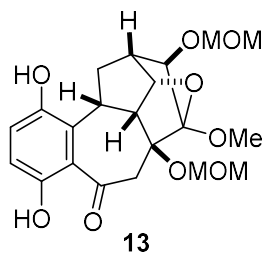

# <sup>1</sup>H-NMR (400 MHz, CDCl<sub>3</sub>)

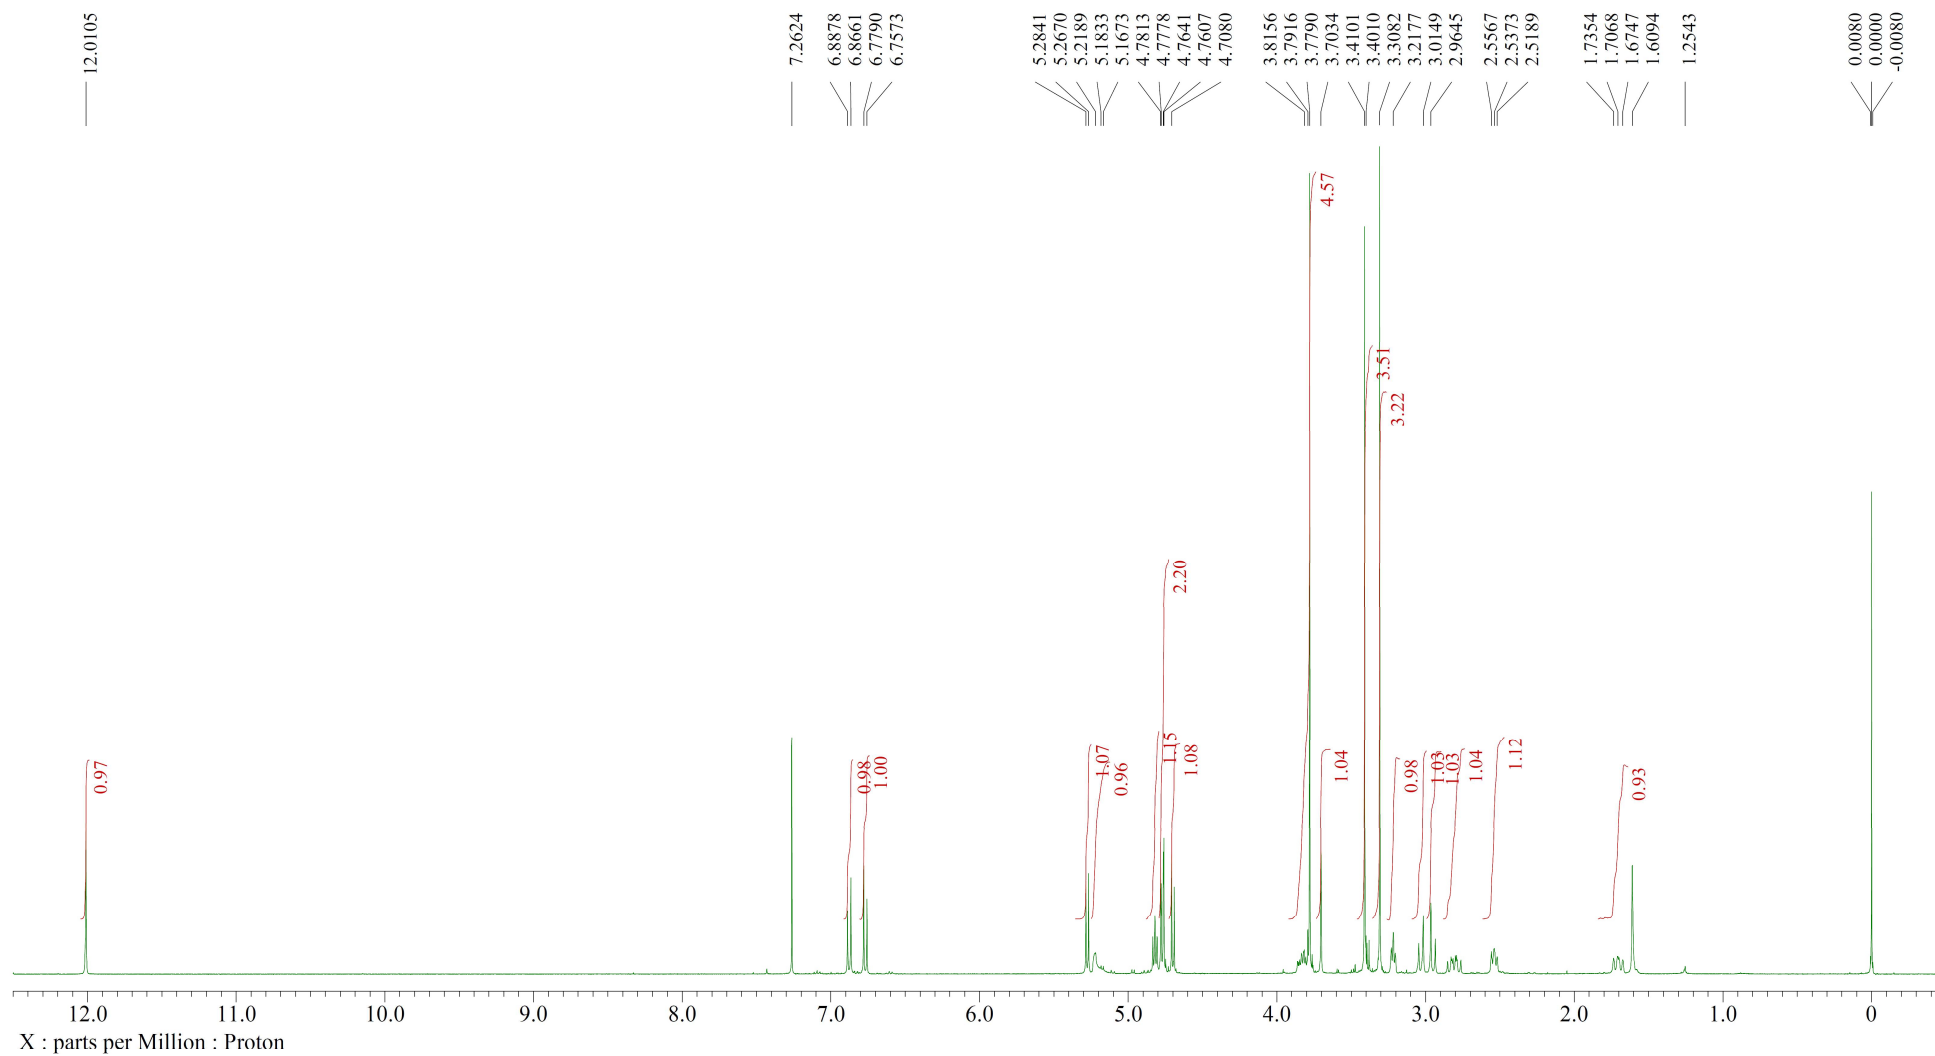



$^{13}\text{C-NMR}$  (100 MHz,  $\text{CDCl}_3$ )

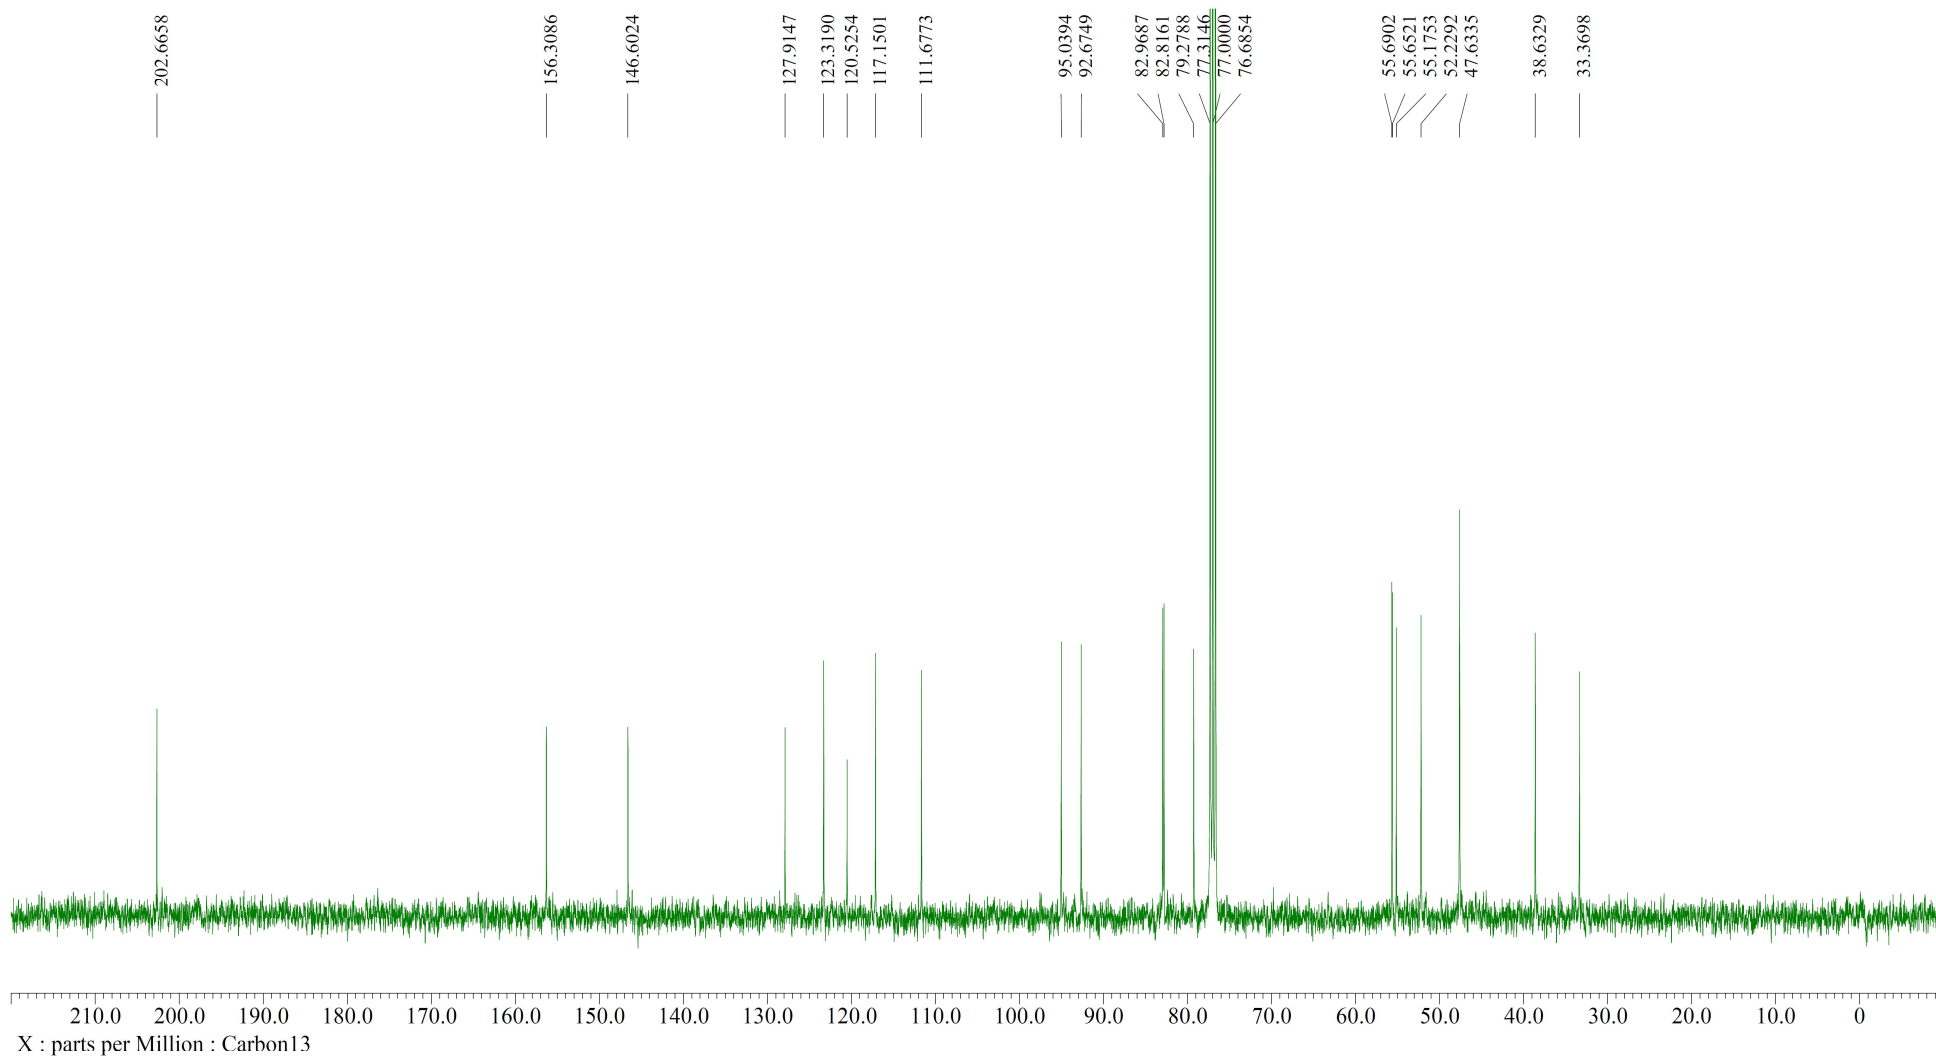

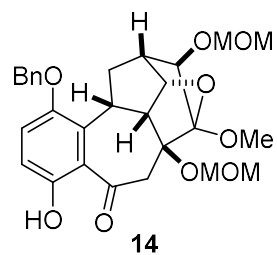

# <sup>1</sup>H-NMR (400 MHz, CDCl<sub>3</sub>)

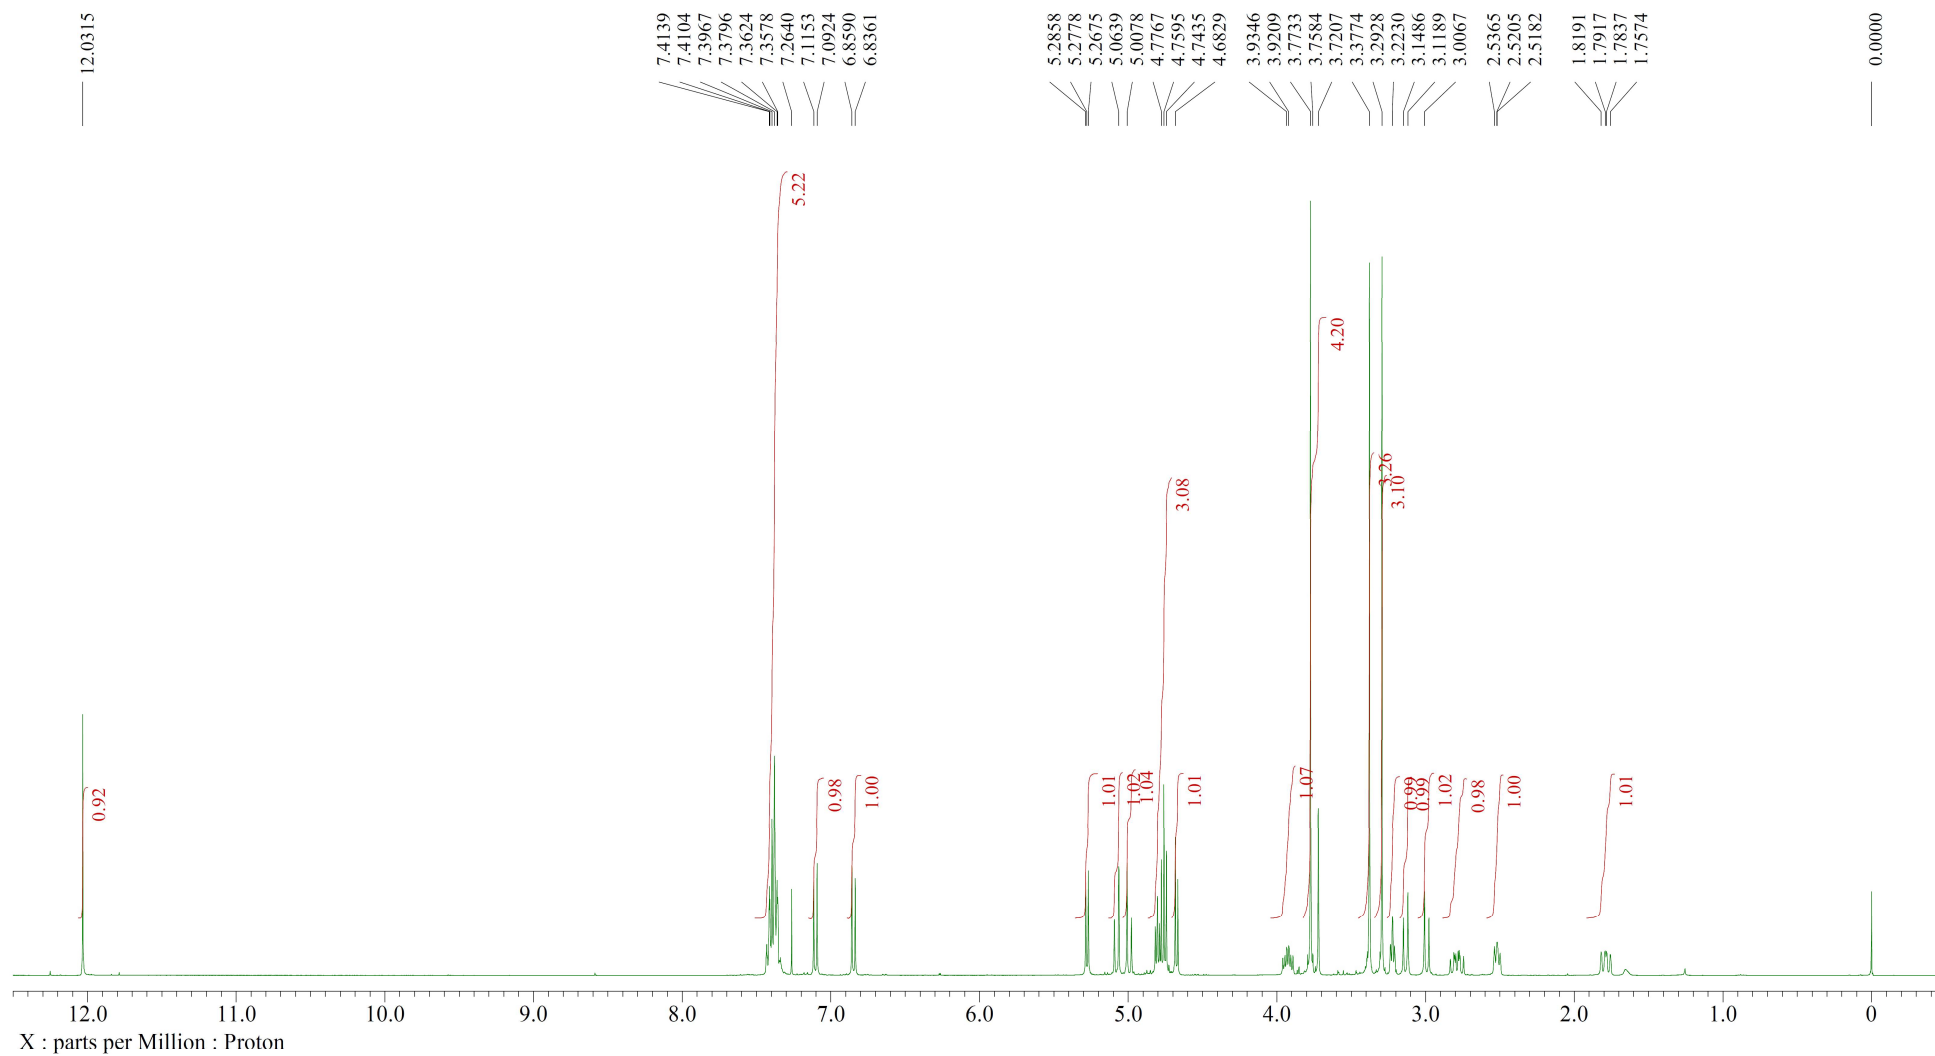

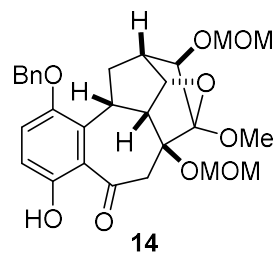

# $^{13}\text{C}$ -NMR (100 MHz, $\text{CDCl}_3$ )

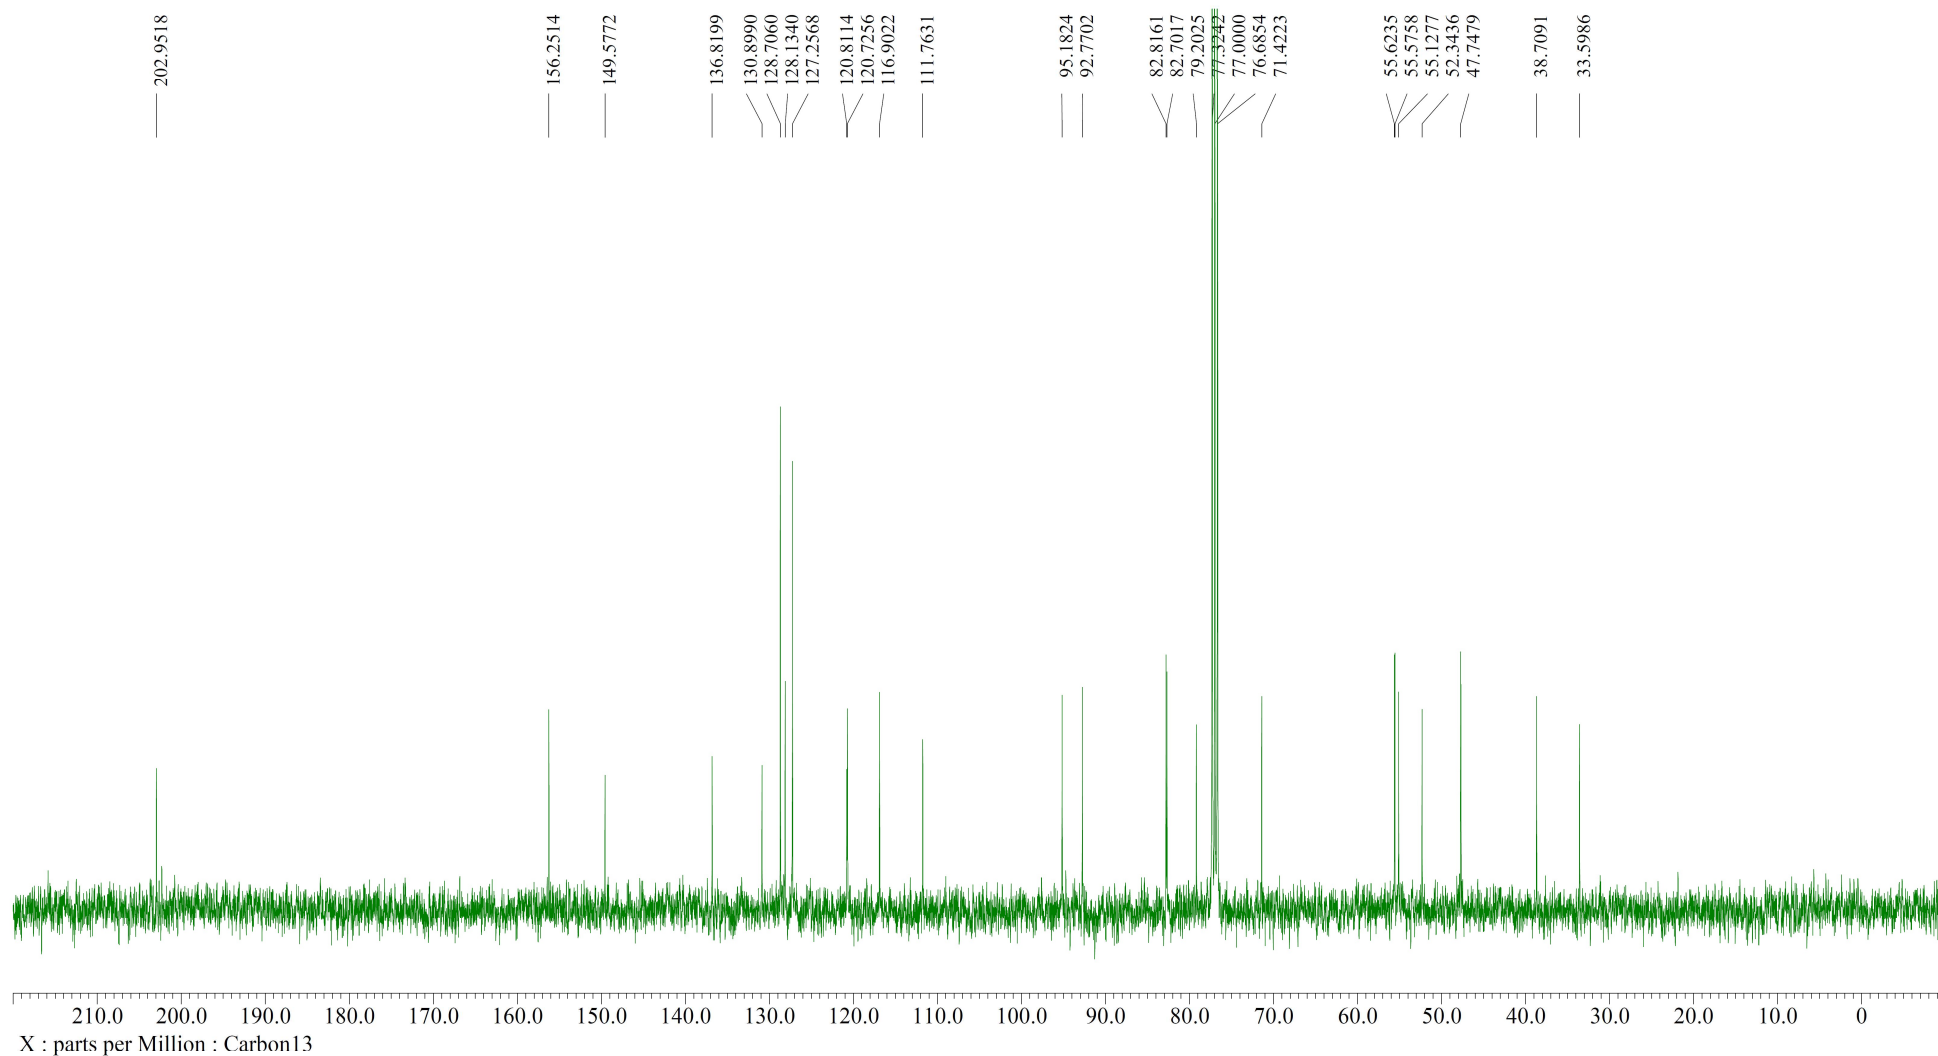

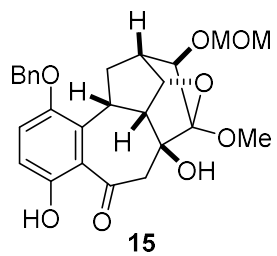

# <sup>1</sup>H-NMR (400 MHz, CDCl<sub>3</sub>)

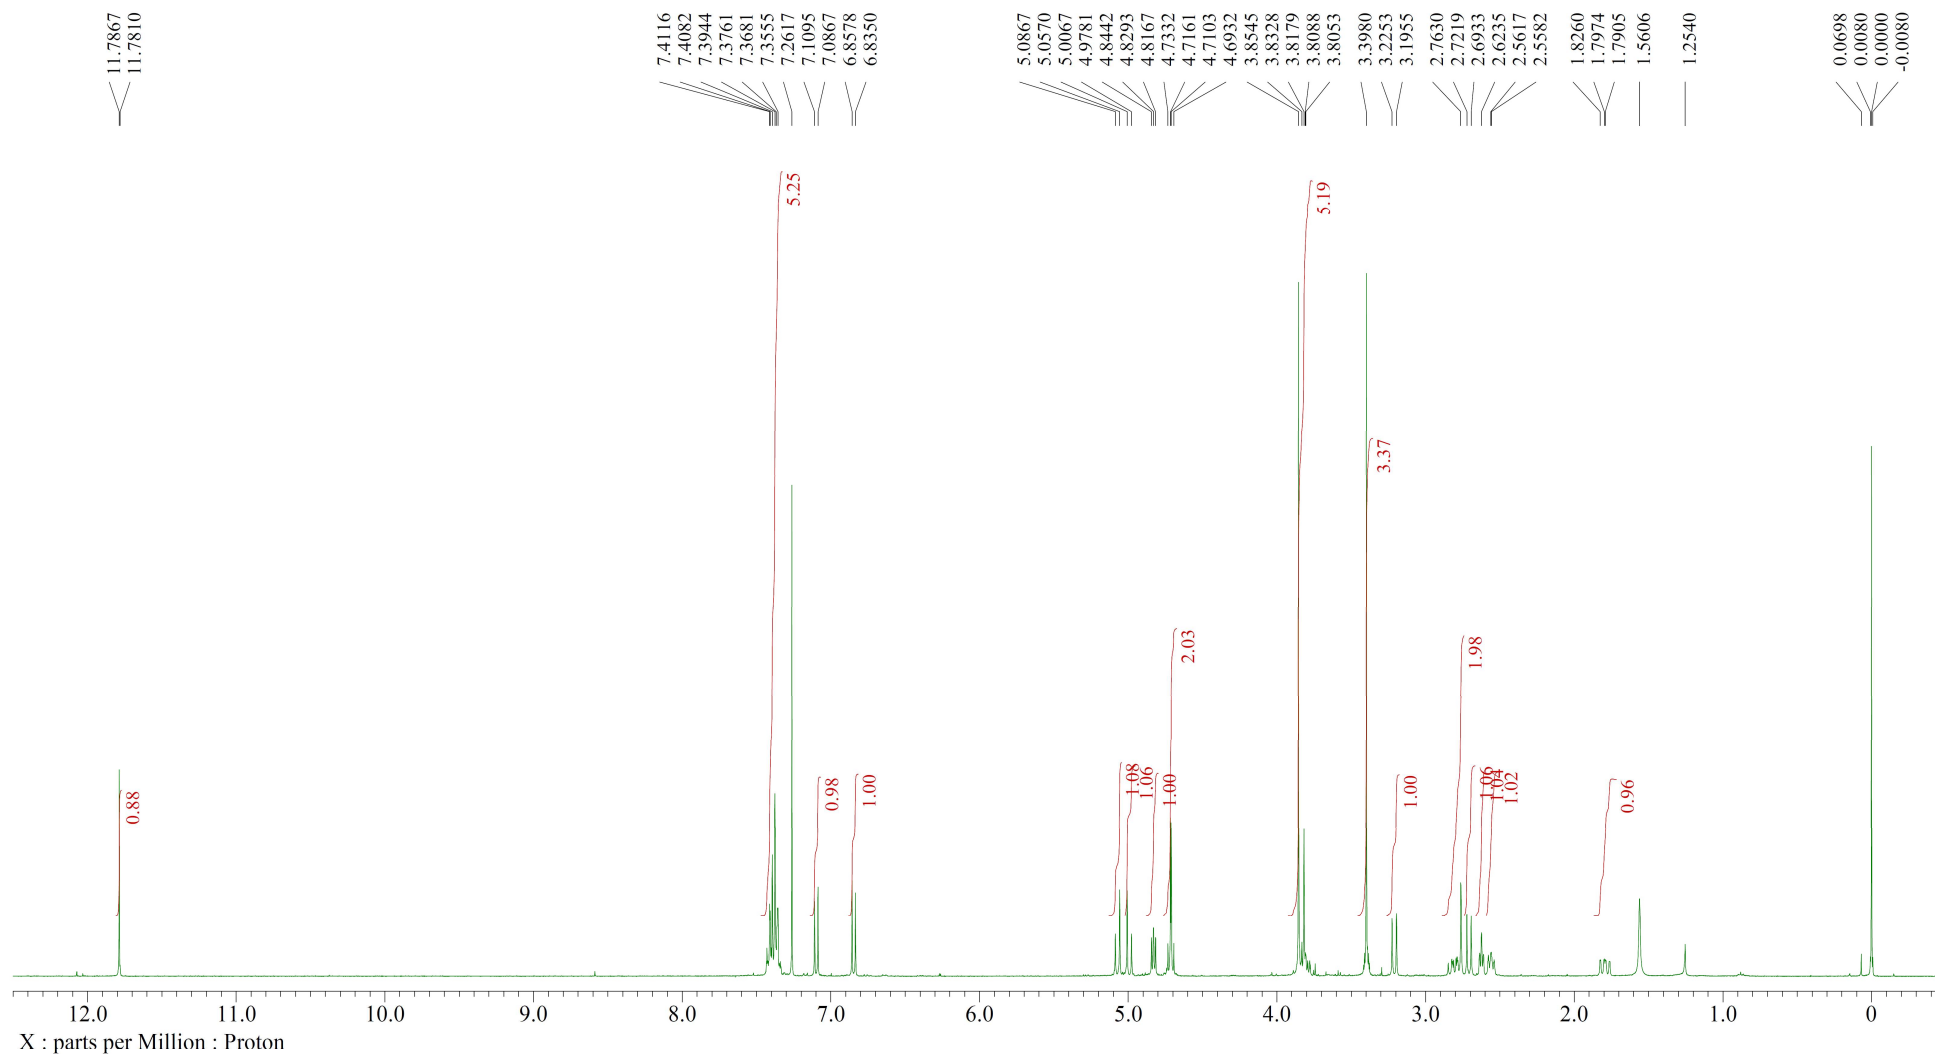



$^{13}\text{C}$ -NMR (100 MHz,  $\text{CDCl}_3$ )

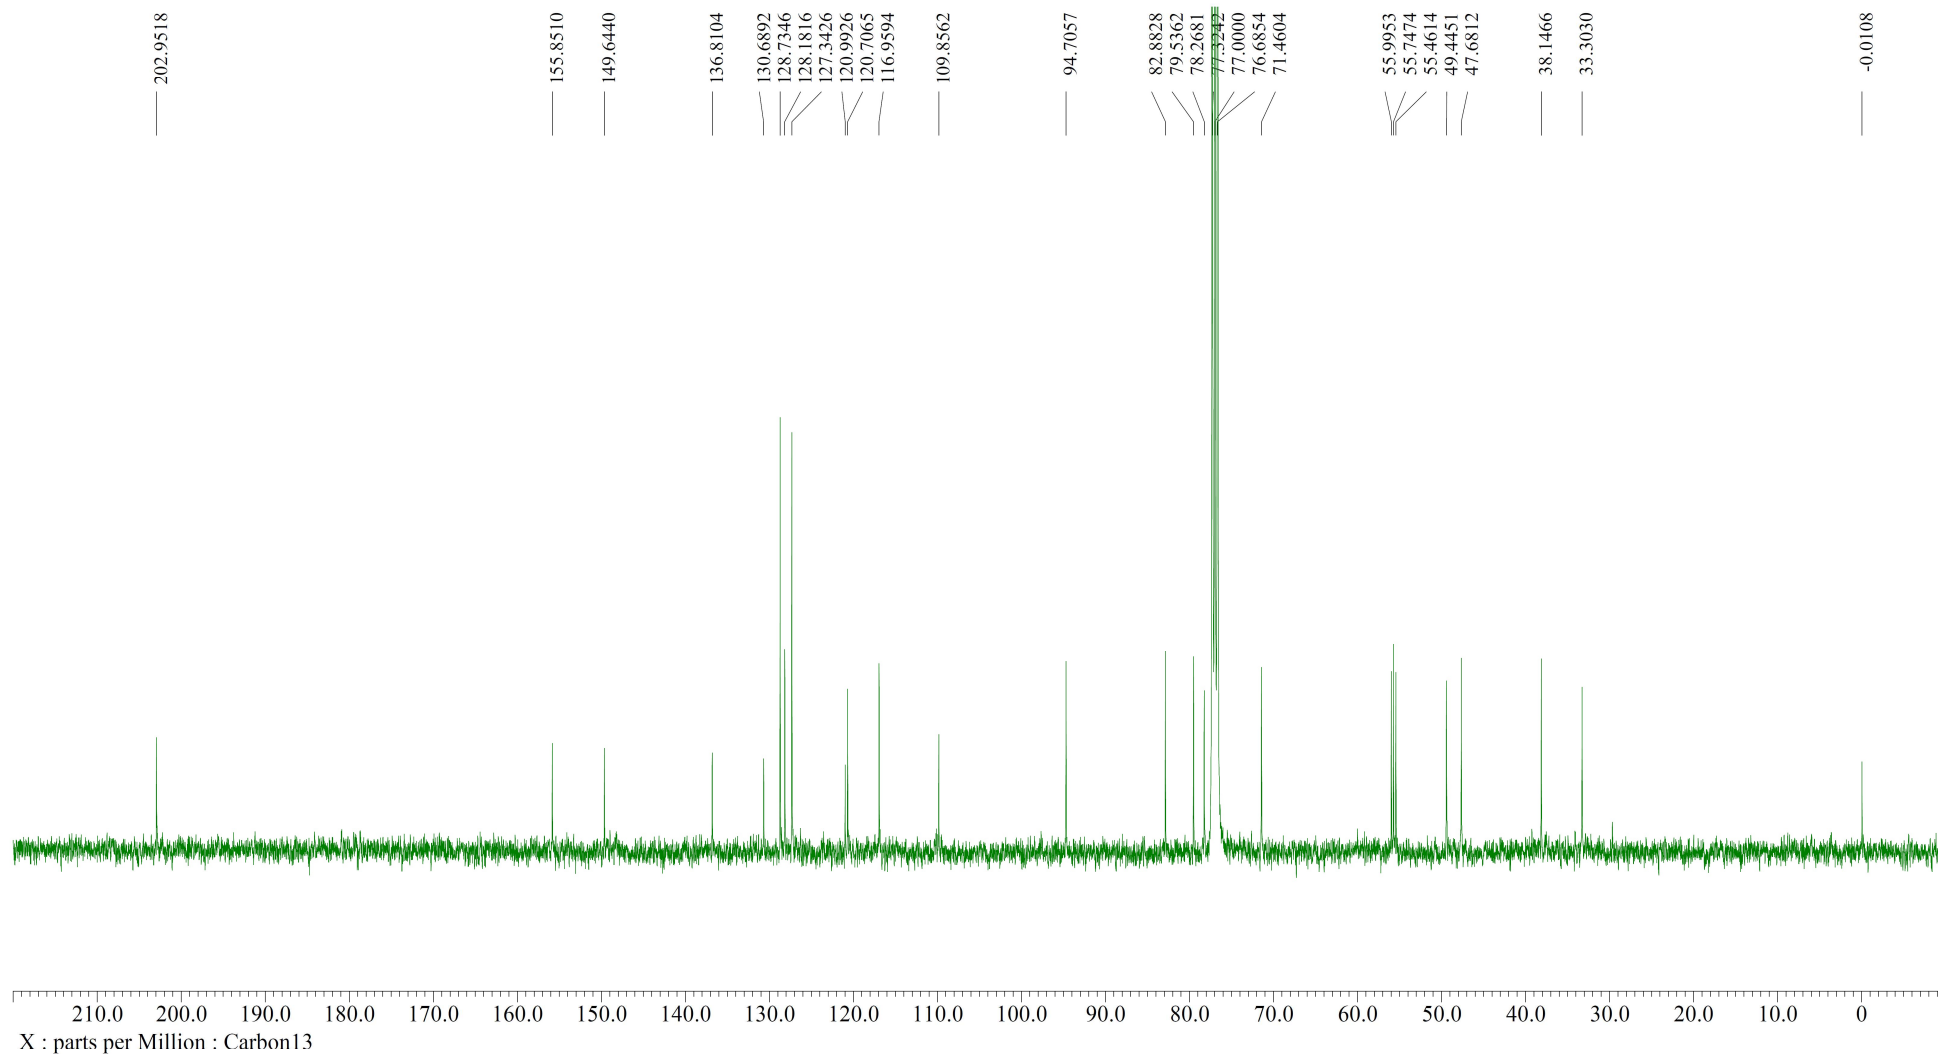

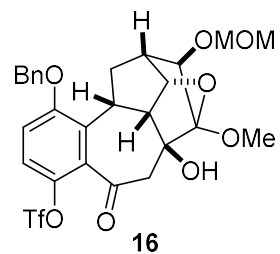

# <sup>1</sup>H-NMR (400 MHz, CDCl<sub>3</sub>)

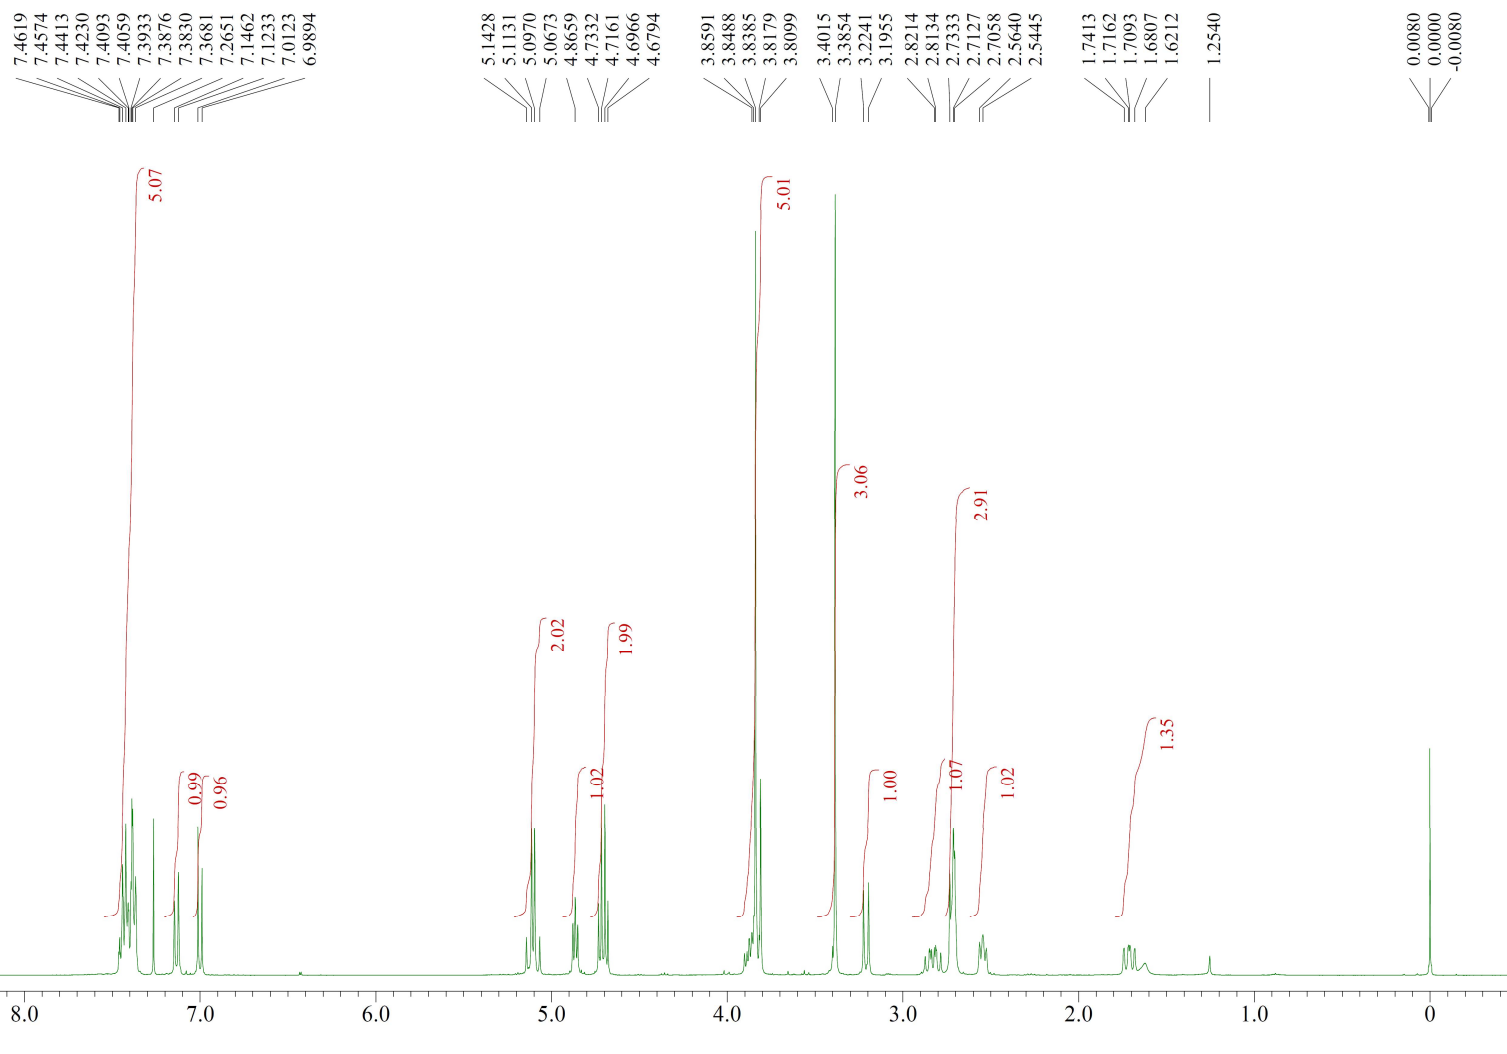

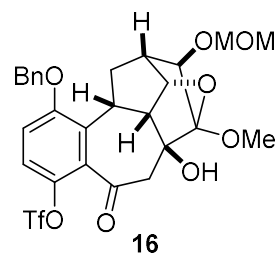

# $^{13}\text{C}$ -NMR (100 MHz, $\text{CDCl}_3$ )

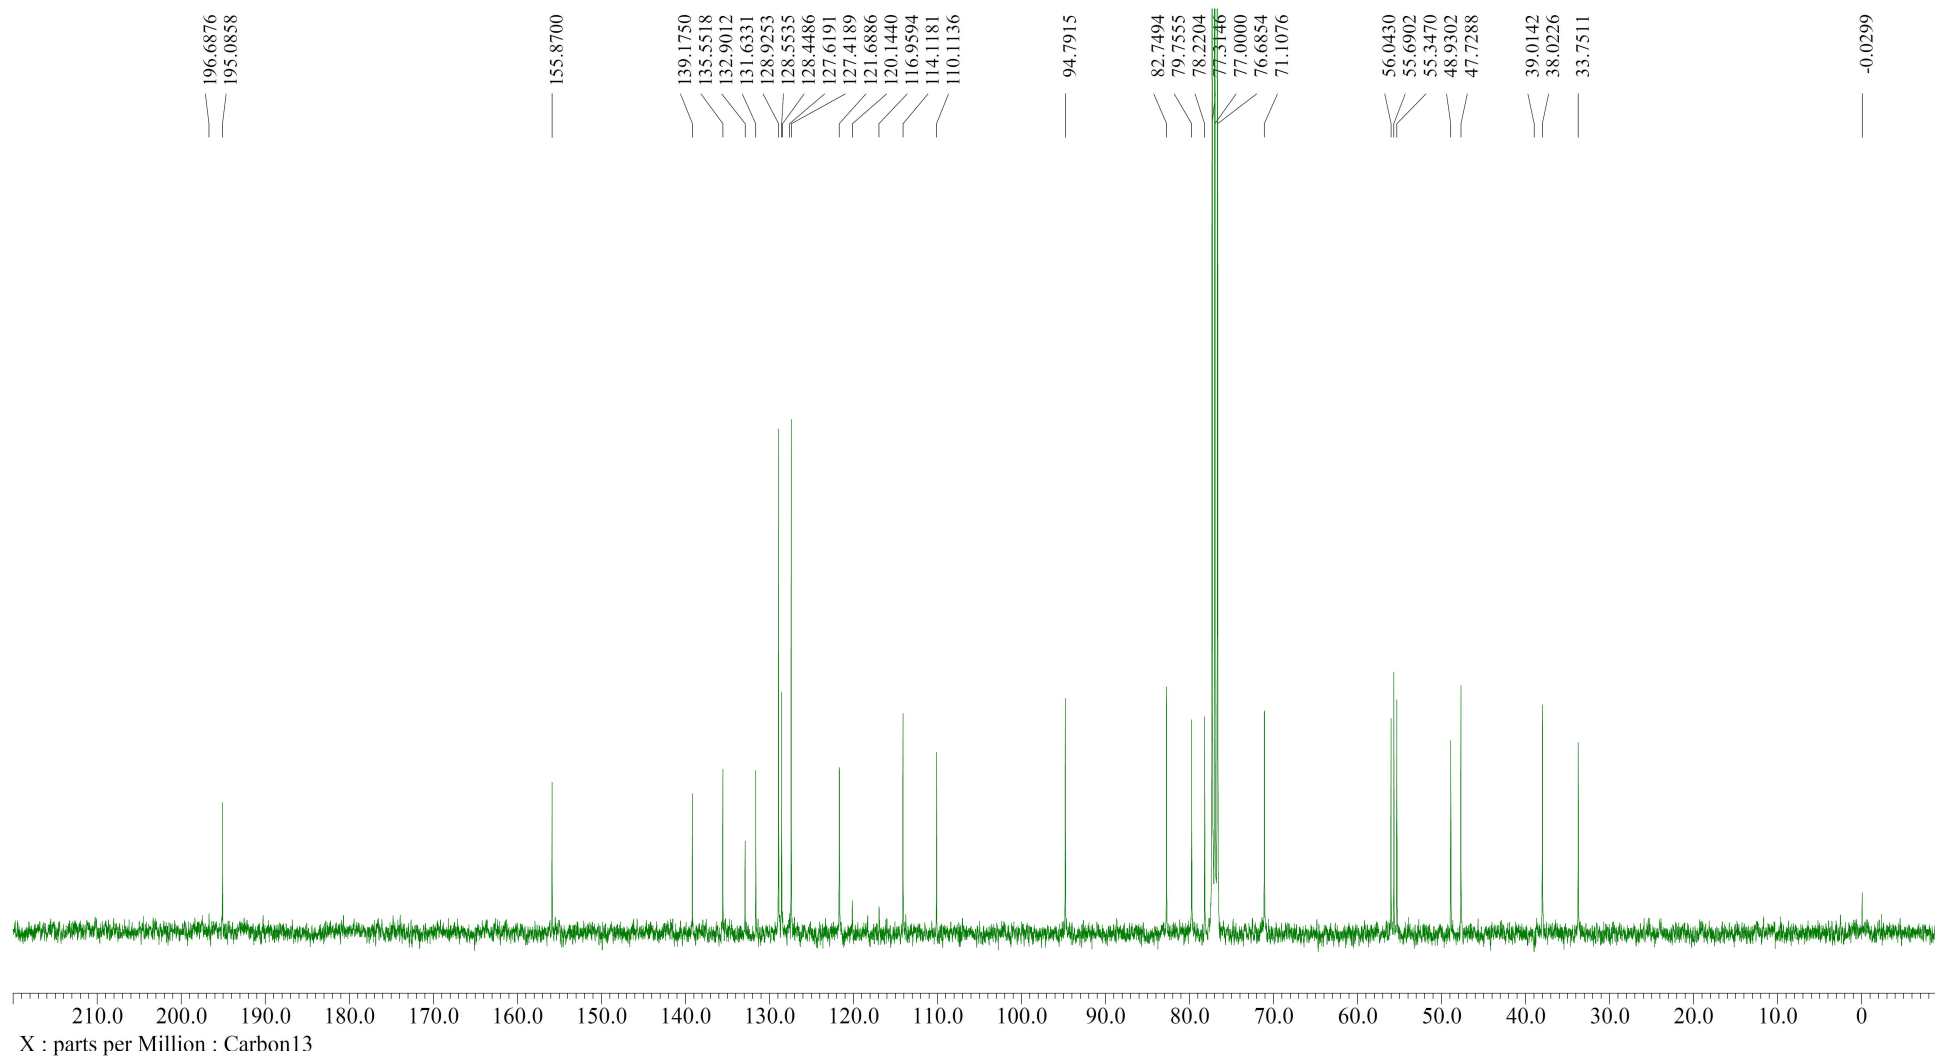



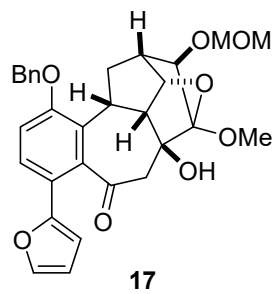

# <sup>1</sup>H-NMR (400 MHz, CDCl<sub>3</sub>)

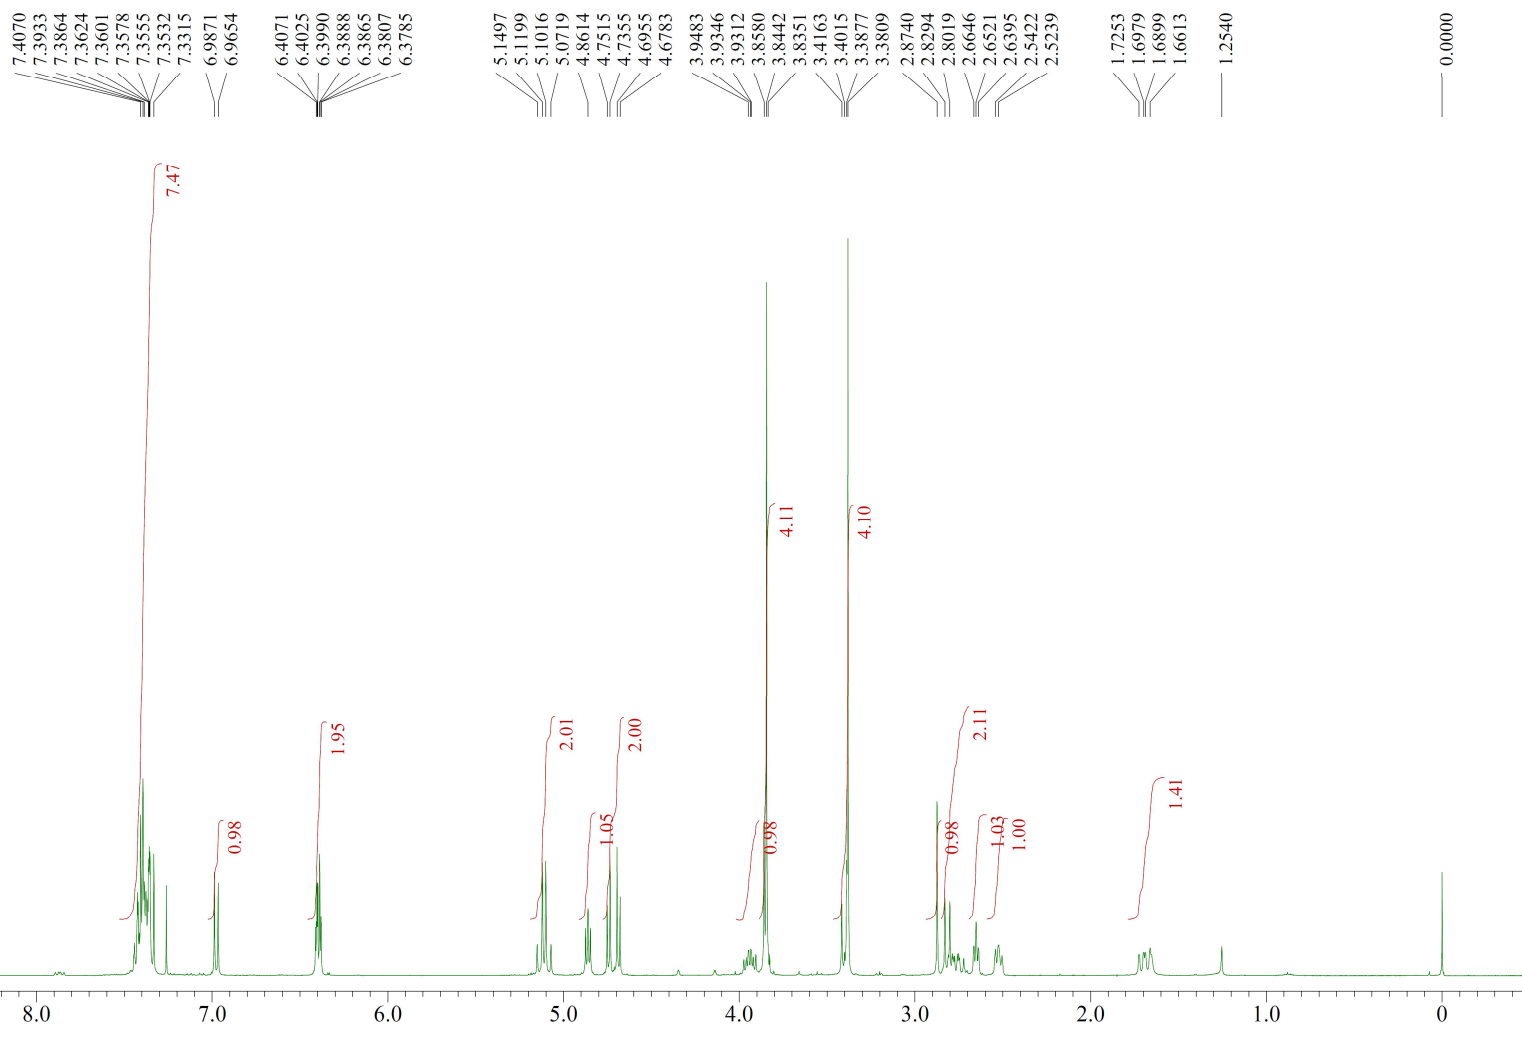

$^{13}\text{C}$ -NMR (100 MHz,  $\text{CDCl}_3$ )

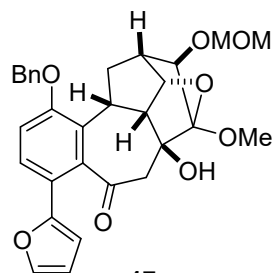

**17**

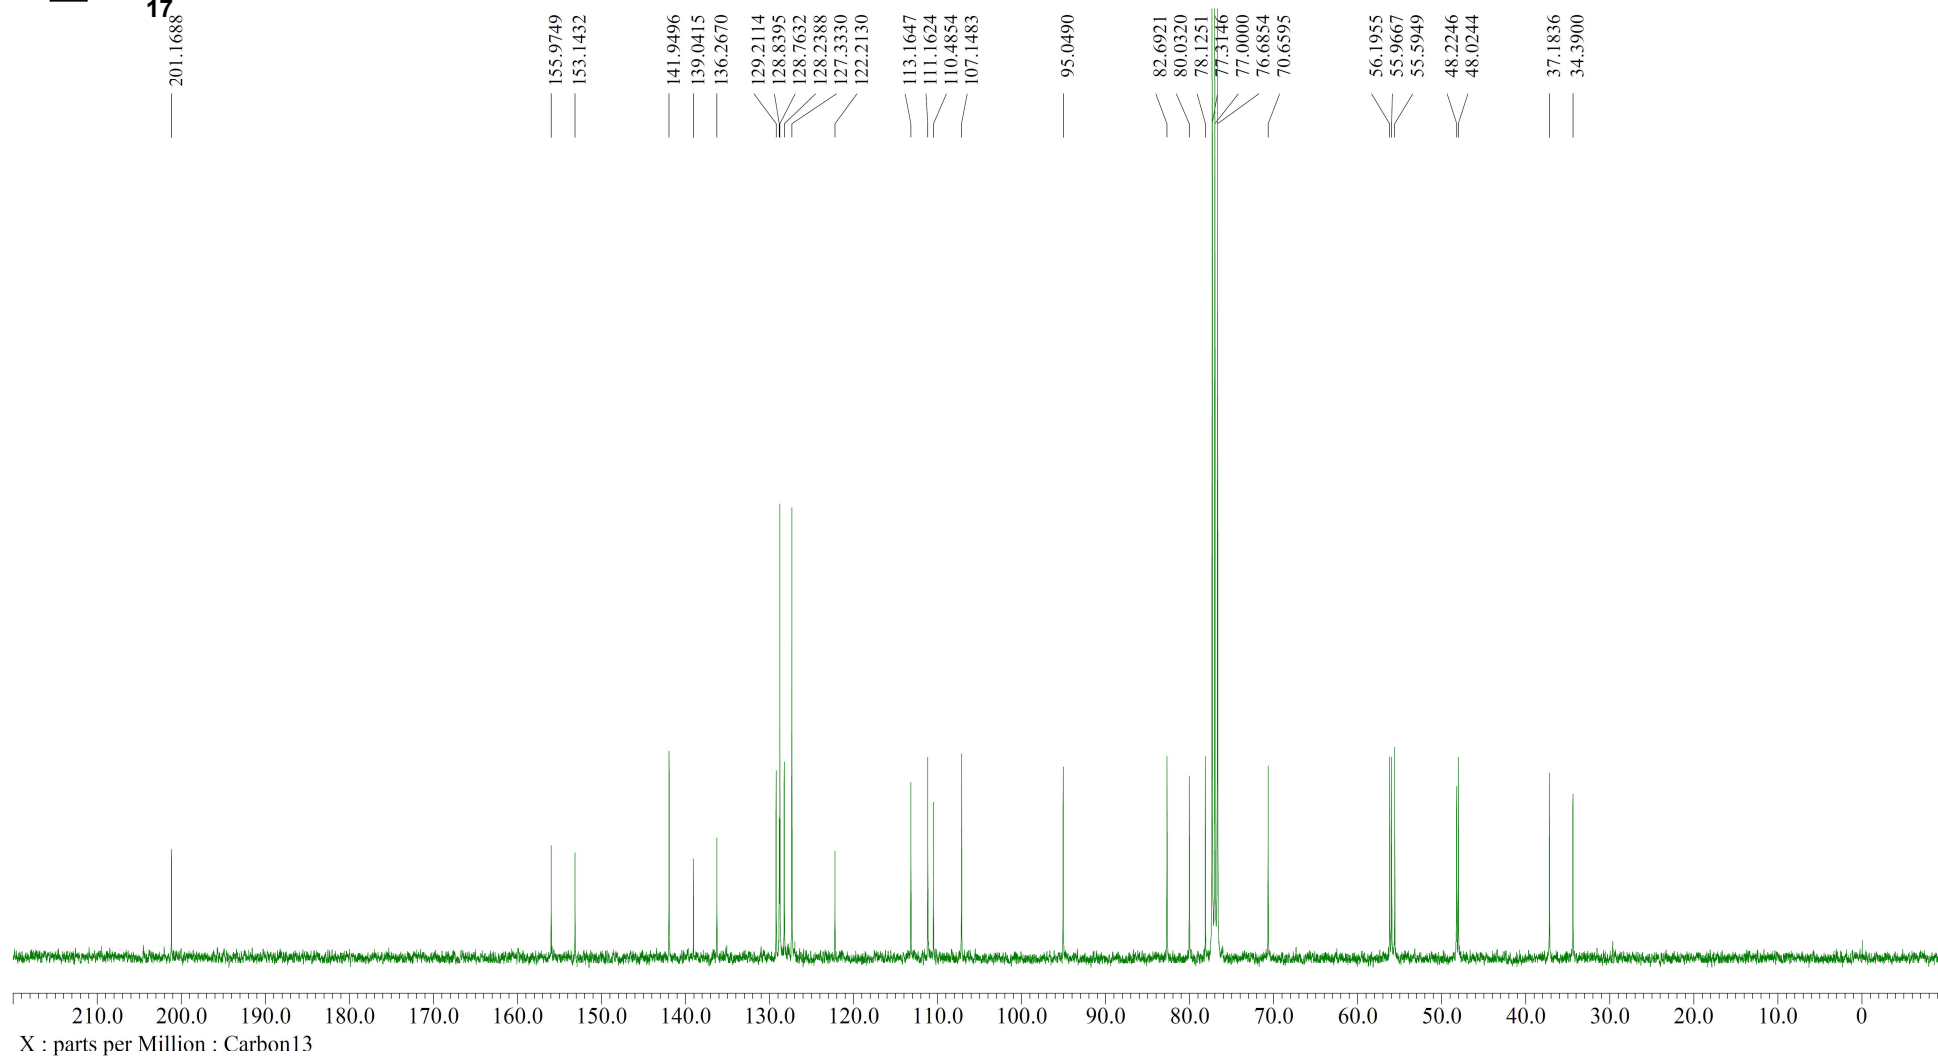

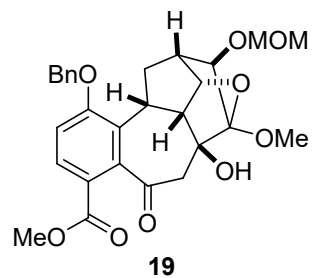

# <sup>1</sup>H-NMR (400 MHz, CDCl<sub>3</sub>)

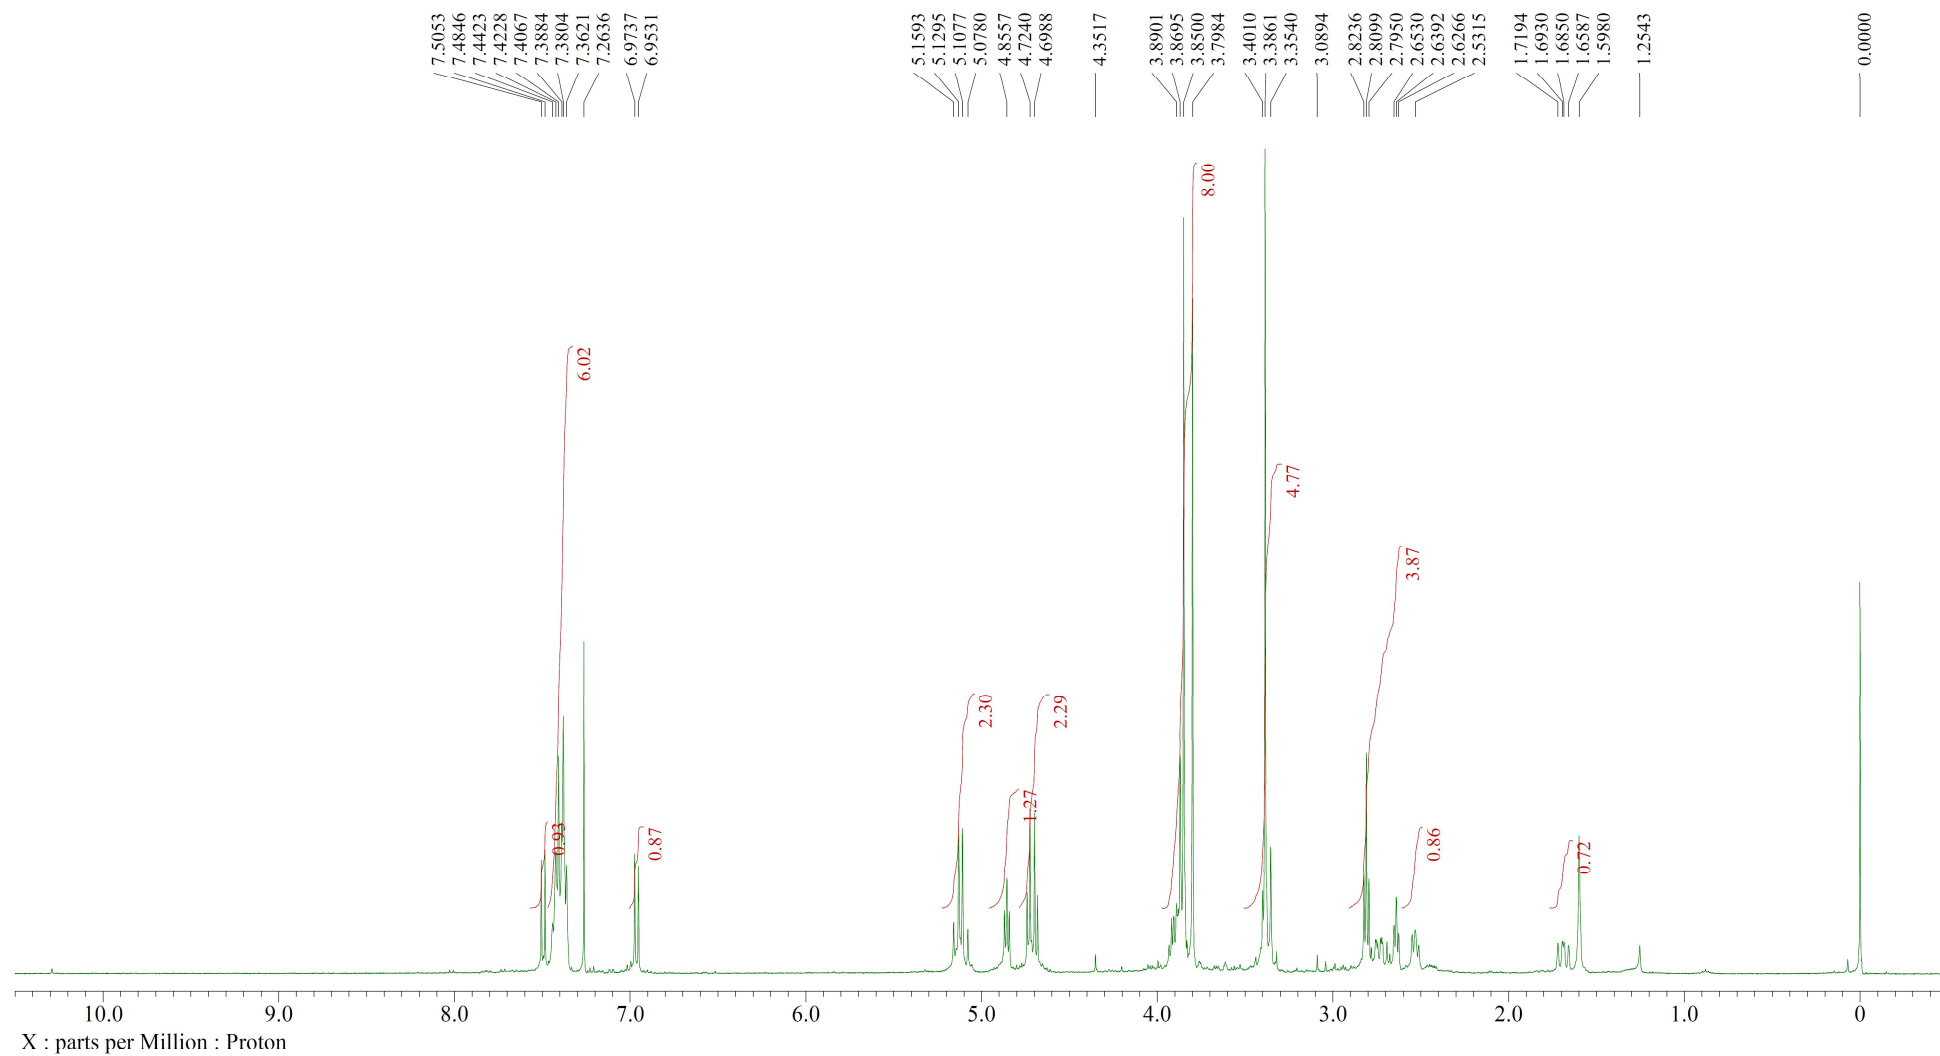

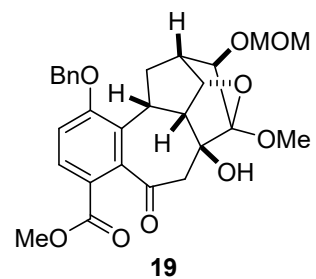

$^{13}\text{C-NMR}$  (100 MHz,  $\text{CDCl}_3$ )

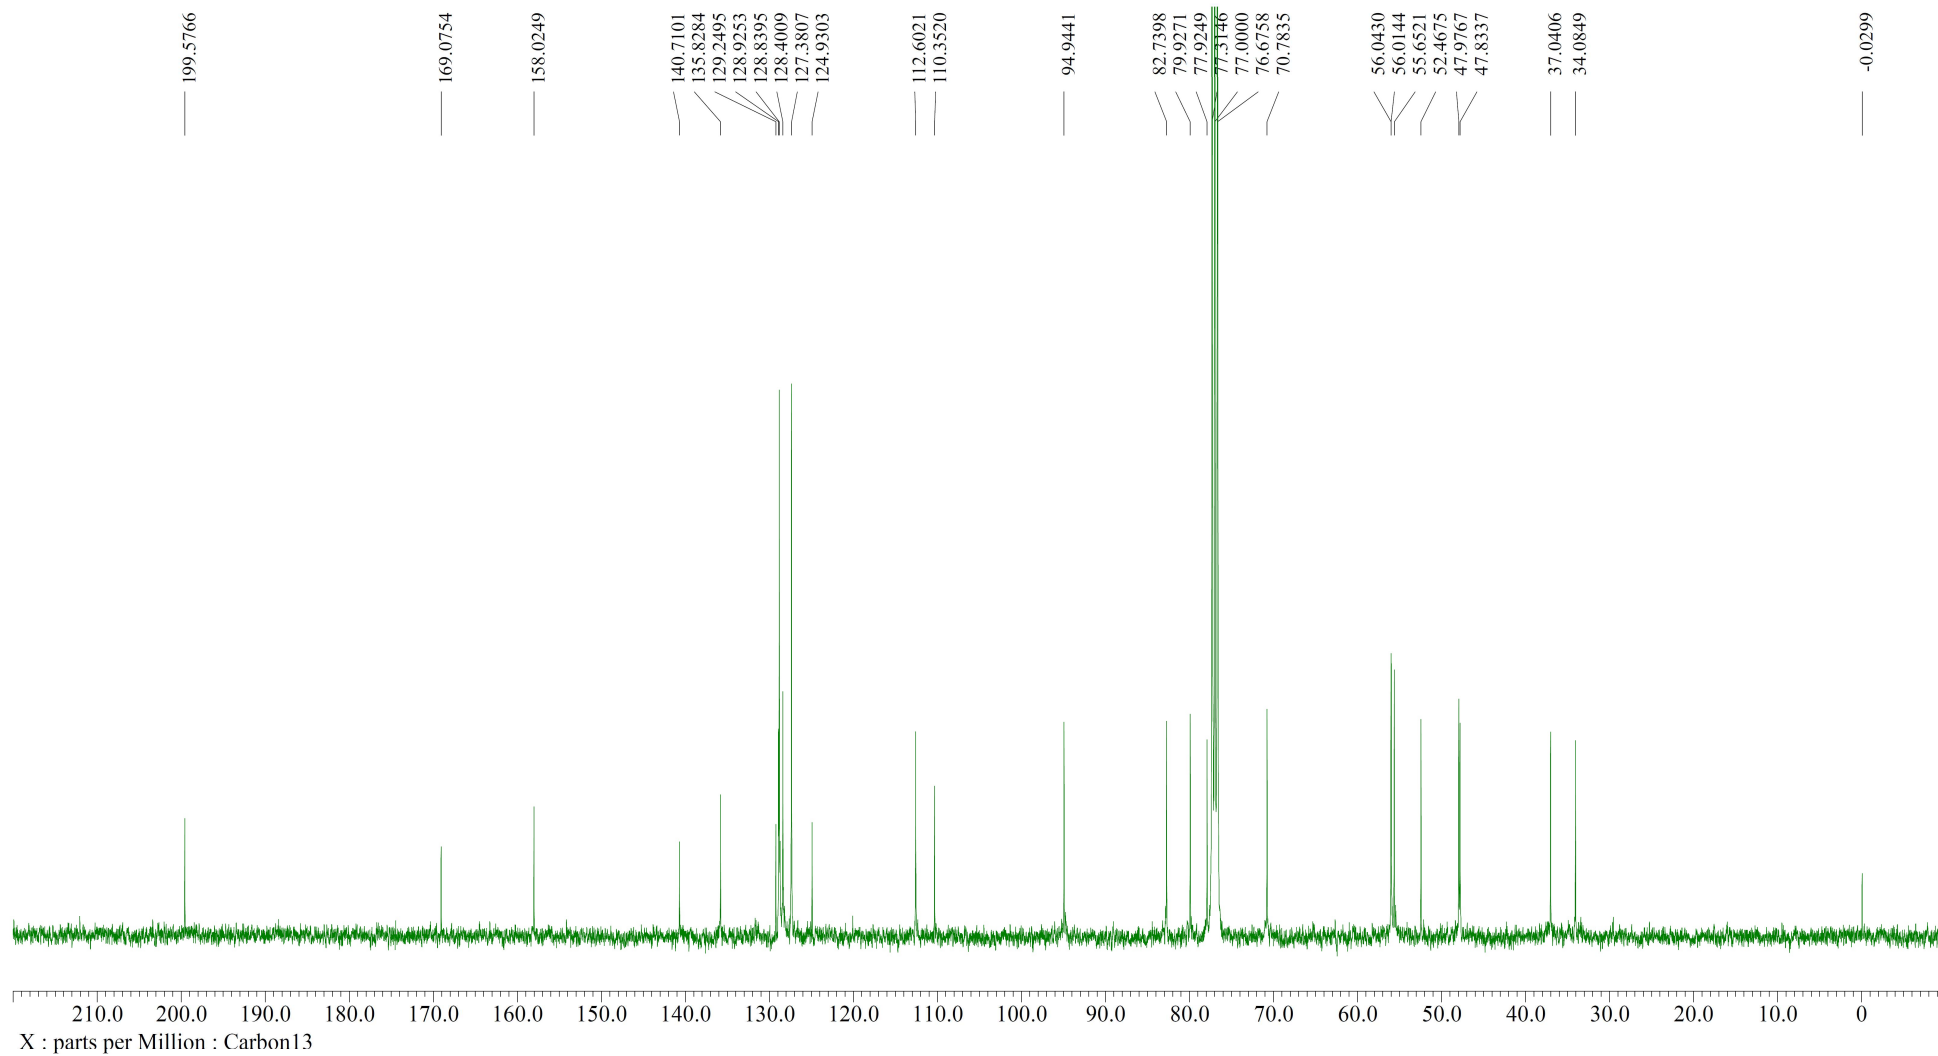

Supplement: d3ob00647f1.pdf [file d3ob00647f1.pdf]
